# Supplementary material for: Hydrogen-based microbial life in Arctic hydrothermal vent plumes of the Gakkel Ridge
Source: Research Square preprint supplement (doi:10.21203/rs.3.rs-3705307/v1), 2023-12-11
Supplement: Supplementary file 1 [file e0d7ccd82339d52a7bb5192d.xlsx]

## Sheet: Suppl.Table1
Supplementary Table 1: Source data for images from the hydrothermal vent sites
Image	image dataset DOI:	small vents	sulphur mats	diffuse fluid flow	pock / crev	blackened sediment	stained cliffs
HOTKEY_2014_07_15 at 11_49_59 6U1B1155.JPG	https://doi.org/10.1594/PANGAEA.839014				1
HOTKEY_2014_07_15 at 11_50_15 6U1B1157.JPG	https://doi.org/10.1594/PANGAEA.839014				1
HOTKEY_2014_07_15 at 11_53_38 6U1B1171.JPG	https://doi.org/10.1594/PANGAEA.839014				1
HOTKEY_2014_07_15 at 11_53_48 6U1B1172.JPG	https://doi.org/10.1594/PANGAEA.839014				1
HOTKEY_2014_07_15 at 11_54_05 6U1B1174.JPG	https://doi.org/10.1594/PANGAEA.839014				1
HOTKEY_2014_07_15 at 11_57_32 6U1B1193.JPG	https://doi.org/10.1594/PANGAEA.839014				1
HOTKEY_2014_07_15 at 11_54_52 6U1B1179.JPG	https://doi.org/10.1594/PANGAEA.839014				1
HOTKEY_2014_07_15 at 11_55_07 6U1B1181.JPG	https://doi.org/10.1594/PANGAEA.839014				1
HOTKEY_2014_07_15 at 11_55_26 6U1B1183.JPG	https://doi.org/10.1594/PANGAEA.839014				1
HOTKEY_2014_07_15 at 11_56_14 6U1B1186.JPG	https://doi.org/10.1594/PANGAEA.839014				1
HOTKEY_2014_07_15 at 11_56_27 6U1B1188.JPG	https://doi.org/10.1594/PANGAEA.839014				1
HOTKEY_2014_07_15 at 11_57_10 6U1B1191.JPG	https://doi.org/10.1594/PANGAEA.839014				1
HOTKEY_2014_07_15 at 12_06_51 6U1B1235.JPG	https://doi.org/10.1594/PANGAEA.839014				1
HOTKEY_2014_07_15 at 12_08_04 6U1B1240.JPG	https://doi.org/10.1594/PANGAEA.839014				1
HOTKEY_2014_07_15 at 11_57_32 6U1B1193.JPG	https://doi.org/10.1594/PANGAEA.839014				1
HOTKEY_2014_07_15 at 11_58_11 6U1B1196.JPG	https://doi.org/10.1594/PANGAEA.839014				1
HOTKEY_2014_07_15 at 11_59_38 6U1B1204.JPG	https://doi.org/10.1594/PANGAEA.839014				1
HOTKEY_2014_07_15 at 12_06_15 6U1B1232.JPG	https://doi.org/10.1594/PANGAEA.839014				1
HOTKEY_2014_07_15 at 12_06_15 6U1B1232.JPG	https://doi.org/10.1594/PANGAEA.839014				1
TIMER_SYNC_TO_2014_07_15 at 12_09_04 6U1B1244.JPG	https://doi.org/10.1594/PANGAEA.839014				1
TIMER_SYNC_TO_2014_07_15 at 11_49_23 6U1B1153.JPG	https://doi.org/10.1594/PANGAEA.839014				1
TIMER_SYNC_TO_2014_07_15 at 11_49_43 6U1B1154.JPG	https://doi.org/10.1594/PANGAEA.839014				1
TIMER_SYNC_TO_2014_07_15 at 11_50_04 6U1B1156.JPG	https://doi.org/10.1594/PANGAEA.839014				1
TIMER_SYNC_TO_2014_07_15 at 11_50_24 6U1B1158.JPG	https://doi.org/10.1594/PANGAEA.839014				1
TIMER_SYNC_TO_2014_07_15 at 11_53_54 6U1B1173.JPG	https://doi.org/10.1594/PANGAEA.839014				1
TIMER_SYNC_TO_2014_07_15 at 11_54_15 6U1B1175.JPG	https://doi.org/10.1594/PANGAEA.839014				1
TIMER_SYNC_TO_2014_07_15 at 11_54_36 6U1B1177.JPG	https://doi.org/10.1594/PANGAEA.839014				1
TIMER_SYNC_TO_2014_07_15 at 11_54_58 6U1B1180.JPG	https://doi.org/10.1594/PANGAEA.839014				1
TIMER_SYNC_TO_2014_07_15 at 11_55_20 6U1B1182.JPG	https://doi.org/10.1594/PANGAEA.839014				1
TIMER_SYNC_TO_2014_07_15 at 11_55_41 6U1B1184.JPG	https://doi.org/10.1594/PANGAEA.839014				1
TIMER_SYNC_TO_2014_07_15 at 11_56_21 6U1B1187.JPG	https://doi.org/10.1594/PANGAEA.839014				1
TIMER_SYNC_TO_2014_07_15 at 11_56_41 6U1B1189.JPG	https://doi.org/10.1594/PANGAEA.839014				1
TIMER_SYNC_TO_2014_07_15 at 11_57_01 6U1B1190.JPG	https://doi.org/10.1594/PANGAEA.839014				1
TIMER_SYNC_TO_2014_07_15 at 11_57_22 6U1B1192.JPG	https://doi.org/10.1594/PANGAEA.839014				1
TIMER_SYNC_TO_2014_07_15 at 11_57_43 6U1B1194.JPG	https://doi.org/10.1594/PANGAEA.839014				1
TIMER_SYNC_TO_2014_07_15 at 11_58_02 6U1B1195.JPG	https://doi.org/10.1594/PANGAEA.839014				1
TIMER_SYNC_TO_2014_07_15 at 11_58_47 6U1B1200.JPG	https://doi.org/10.1594/PANGAEA.839014				1
TIMER_SYNC_TO_2014_07_15 at 11_59_08 6U1B1201.JPG	https://doi.org/10.1594/PANGAEA.839014				1
TIMER_SYNC_TO_2014_07_15 at 11_59_29 6U1B1203.JPG	https://doi.org/10.1594/PANGAEA.839014				1
TIMER_SYNC_TO_2014_07_15 at 12_00_32 6U1B1208.JPG	https://doi.org/10.1594/PANGAEA.839014				1
TIMER_SYNC_TO_2014_07_15 at 12_01_12 6U1B1211.JPG	https://doi.org/10.1594/PANGAEA.839014				1
TIMER_SYNC_TO_2014_07_15 at 12_01_32 6U1B1213.JPG	https://doi.org/10.1594/PANGAEA.839014				1
TIMER_SYNC_TO_2014_07_15 at 12_02_13 6U1B1216.JPG	https://doi.org/10.1594/PANGAEA.839014				1
TIMER_SYNC_TO_2014_07_15 at 12_02_33 6U1B1218.JPG	https://doi.org/10.1594/PANGAEA.839014				1
TIMER_SYNC_TO_2014_07_15 at 12_05_58 6U1B1231.JPG	https://doi.org/10.1594/PANGAEA.839014				1
TIMER_SYNC_TO_2014_07_15 at 12_06_40 6U1B1234.JPG	https://doi.org/10.1594/PANGAEA.839014				1
TIMER_SYNC_TO_2014_07_15 at 12_07_01 6U1B1236.JPG	https://doi.org/10.1594/PANGAEA.839014				1
TIMER_SYNC_TO_2014_07_15 at 12_07_21 6U1B1237.JPG	https://doi.org/10.1594/PANGAEA.839014				1
TIMER_SYNC_TO_2014_07_15 at 12_08_22 6U1B1241.JPG	https://doi.org/10.1594/PANGAEA.839014				1
TIMER_SYNC_TO_2014_07_15 at 12_08_43 6U1B1242.JPG	https://doi.org/10.1594/PANGAEA.839014				1
TIMER_SYNC_TO_2014_07_15 at 12_22_02 6U1B1298.JPG	https://doi.org/10.1594/PANGAEA.839014				1
HOTKEY_2014_07_16 at 16_47_46 6U1B1856.JPG	https://doi.org/10.1594/PANGAEA.839015				1
HOTKEY_2014_07_16 at 16_47_29 6U1B1854.JPG	https://doi.org/10.1594/PANGAEA.839015				1
HOTKEY_2014_07_16 at 16_47_41 6U1B1855.JPG	https://doi.org/10.1594/PANGAEA.839015				1
HOTKEY_2014_07_16 at 19_23_17 6U1B2411.JPG	https://doi.org/10.1594/PANGAEA.839015				1
HOTKEY_2014_07_16 at 19_23_13 6U1B2410.JPG	https://doi.org/10.1594/PANGAEA.839015				1
TIMER_SYNC_2014_07_16 at 19_23_22 6U1B2412.JPG	https://doi.org/10.1594/PANGAEA.839015				1
TIMER_SYNC_2014_07_16 at 19_23_01 6U1B2409.JPG	https://doi.org/10.1594/PANGAEA.839015				1
HOTKEY_2014_07_17 at 19_52_57 6U1B2733.JPG	https://doi.org/10.1594/PANGAEA.839026		1
HOTKEY_2014_07_17 at 19_53_04 6U1B2734.JPG	https://doi.org/10.1594/PANGAEA.839026		1
HOTKEY_2014_07_17 at 19_53_43 6U1B2737.JPG	https://doi.org/10.1594/PANGAEA.839026		1
TIMER_SYNC_2014_07_17 at 19_53_55 6U1B2738.JPG	https://doi.org/10.1594/PANGAEA.839026		1
TIMER_SYNC_2014_07_17 at 19_52_52 6U1B2732.JPG	https://doi.org/10.1594/PANGAEA.839026		1
TIMER_SYNC_2014_07_17 at 19_53_13 6U1B2735.JPG	https://doi.org/10.1594/PANGAEA.839026		1
TIMER_SYNC_TO_2014_07_17 at 19_54_19 6U1B2739.JPG	https://doi.org/10.1594/PANGAEA.839026		1
TIMER_SYNC_TO_2014_07_17 at 19_51_34 6U1B2728.JPG	https://doi.org/10.1594/PANGAEA.839026		1
TIMER_SYNC_TO_2014_07_17 at 19_52_15 6U1B2730.JPG	https://doi.org/10.1594/PANGAEA.839026		1
TIMER_SYNC_TO_2014_07_17 at 19_52_35 6U1B2731.JPG	https://doi.org/10.1594/PANGAEA.839026		1
TIMER_SYNC_TO_2014_07_17 at 19_53_36 6U1B2736.JPG	https://doi.org/10.1594/PANGAEA.839026		1
HOTKEY_2014_07_20 at 18_12_35 6U1B3389.JPG	https://doi.org/10.1594/PANGAEA.839018				1
HOTKEY_2014_07_20 at 17_59_34 6U1B3351.JPG	https://doi.org/10.1594/PANGAEA.839018				1
HOTKEY_2014_07_20 at 18_00_03 6U1B3353.JPG	https://doi.org/10.1594/PANGAEA.839018				1
HOTKEY_2014_07_20 at 18_03_15 6U1B3361.JPG	https://doi.org/10.1594/PANGAEA.839018				1
HOTKEY_2014_07_20 at 18_08_56 6U1B3377.JPG	https://doi.org/10.1594/PANGAEA.839018				1
HOTKEY_2014_07_20 at 18_09_42 6U1B3380.JPG	https://doi.org/10.1594/PANGAEA.839018				1
HOTKEY_2014_07_20 at 18_09_53 6U1B3381.JPG	https://doi.org/10.1594/PANGAEA.839018				1
HOTKEY_2014_07_20 at 18_10_49 6U1B3384.JPG	https://doi.org/10.1594/PANGAEA.839018				1
HOTKEY_2014_07_20 at 18_11_54 6U1B3387.JPG	https://doi.org/10.1594/PANGAEA.839018				1
TIMER_SYNC_2014_07_20 at 17_20_56 6U1B3251.JPG	https://doi.org/10.1594/PANGAEA.839018				1
TIMER_SYNC_2014_07_20 at 18_03_22 6U1B3362.JPG	https://doi.org/10.1594/PANGAEA.839018				1
TIMER_SYNC_2014_07_20 at 18_12_39 6U1B3390.JPG	https://doi.org/10.1594/PANGAEA.839018				1
TIMER_SYNC_2014_07_20 at 18_09_00 6U1B3378.JPG	https://doi.org/10.1594/PANGAEA.839018				1
TIMER_SYNC_2014_07_20 at 18_09_30 6U1B3379.JPG	https://doi.org/10.1594/PANGAEA.839018				1
TIMER_SYNC_2014_07_20 at 18_10_03 6U1B3382.JPG	https://doi.org/10.1594/PANGAEA.839018				1
TIMER_SYNC_2014_07_20 at 18_10_34 6U1B3383.JPG	https://doi.org/10.1594/PANGAEA.839018				1
TIMER_SYNC_2014_07_20 at 18_11_05 6U1B3385.JPG	https://doi.org/10.1594/PANGAEA.839018				1
TIMER_SYNC_2014_07_20 at 18_12_07 6U1B3388.JPG	https://doi.org/10.1594/PANGAEA.839018				1
TIMER_SYNC_TO_2014_07_20 at 18_20_52 6U1B3407.JPG	https://doi.org/10.1594/PANGAEA.839018				1
TIMER_SYNC_TO_2014_07_20 at 17_59_52 6U1B3352.JPG	https://doi.org/10.1594/PANGAEA.839018				1
TIMER_SYNC_TO_2014_07_20 at 18_11_38 6U1B3386.JPG	https://doi.org/10.1594/PANGAEA.839018				1
HOTKEY_2014_07_21T21_00_23_6U1B0661.JPG	https://doi.org/10.1594/PANGAEA.839019				1
HOTKEY_2014_07_22 at 15_21_26 6U1B1003.JPG	https://doi.org/10.1594/PANGAEA.839020				1
HOTKEY_2014_07_22 at 15_21_53 6U1B1005.JPG	https://doi.org/10.1594/PANGAEA.839020				1
HOTKEY_2014_07_22 at 15_22_06 6U1B1006.JPG	https://doi.org/10.1594/PANGAEA.839020				1
HOTKEY_2014_07_22 at 15_23_04 6U1B1009.JPG	https://doi.org/10.1594/PANGAEA.839020				1
HOTKEY_2014_07_22 at 15_23_30 6U1B1012.JPG	https://doi.org/10.1594/PANGAEA.839020				1
TIMER_SYNC_2014_07_22 at 15_23_18 6U1B1010.JPG	https://doi.org/10.1594/PANGAEA.839020				1
TIMER_SYNC_2014_07_22 at 15_21_11 6U1B1002.JPG	https://doi.org/10.1594/PANGAEA.839020				1
TIMER_SYNC_2014_07_22 at 15_22_17 6U1B1007.JPG	https://doi.org/10.1594/PANGAEA.839020				1
TIMER_SYNC_TO_2014_07_22 at 15_24_55 6U1B1016.JPG	https://doi.org/10.1594/PANGAEA.839020				1
HOTKEY_2014_07_24 at 20_39_03 6U1B1777.JPG	https://doi.org/10.1594/PANGAEA.839026				1
HOTKEY_2014_07_24 at 20_32_10 6U1B1757.JPG	https://doi.org/10.1594/PANGAEA.839026				1
HOTKEY_2014_07_24 at 20_32_20 6U1B1758.JPG	https://doi.org/10.1594/PANGAEA.839026				1
HOTKEY_2014_07_24 at 20_32_34 6U1B1759.JPG	https://doi.org/10.1594/PANGAEA.839026				1
HOTKEY_2014_07_24 at 20_32_46 6U1B1760.JPG	https://doi.org/10.1594/PANGAEA.839026				1
HOTKEY_2014_07_24 at 20_33_25 6U1B1763.JPG	https://doi.org/10.1594/PANGAEA.839026				1
HOTKEY_2014_07_24 at 20_33_44 6U1B1764.JPG	https://doi.org/10.1594/PANGAEA.839026				1
HOTKEY_2014_07_24 at 20_33_58 6U1B1766.JPG	https://doi.org/10.1594/PANGAEA.839026				1
HOTKEY_2014_07_25 at 12_21_29 6U1B1836.JPG	https://doi.org/10.1594/PANGAEA.839022				1
HOTKEY_2014_07_25 at 12_20_54 6U1B1834.JPG	https://doi.org/10.1594/PANGAEA.839022				1
HOTKEY_2014_07_25 at 12_28_05 6U1B1853.JPG	https://doi.org/10.1594/PANGAEA.839022				1
HOTKEY_2014_07_25 at 14_48_01 6U1B2187.JPG	https://doi.org/10.1594/PANGAEA.839022				1
HOTKEY_2014_07_25 at 14_37_19 6U1B2151.JPG	https://doi.org/10.1594/PANGAEA.839022				1
HOTKEY_2014_07_25 at 14_37_27 6U1B2152.JPG	https://doi.org/10.1594/PANGAEA.839022				1
HOTKEY_2014_07_25 at 14_38_24 6U1B2155.JPG	https://doi.org/10.1594/PANGAEA.839022				1
HOTKEY_2014_07_25 at 14_38_48 6U1B2157.JPG	https://doi.org/10.1594/PANGAEA.839022				1
HOTKEY_2014_07_25 at 14_39_00 6U1B2158.JPG	https://doi.org/10.1594/PANGAEA.839022				1
HOTKEY_2014_07_25 at 14_39_16 6U1B2160.JPG	https://doi.org/10.1594/PANGAEA.839022				1
HOTKEY_2014_07_25 at 14_39_29 6U1B2161.JPG	https://doi.org/10.1594/PANGAEA.839022				1
HOTKEY_2014_07_25 at 14_39_50 6U1B2163.JPG	https://doi.org/10.1594/PANGAEA.839022				1
HOTKEY_2014_07_25 at 14_40_23 6U1B2165.JPG	https://doi.org/10.1594/PANGAEA.839022				1
HOTKEY_2014_07_25 at 14_41_00 6U1B2167.JPG	https://doi.org/10.1594/PANGAEA.839022				1
HOTKEY_2014_07_25 at 14_43_01 6U1B2172.JPG	https://doi.org/10.1594/PANGAEA.839022				1
HOTKEY_2014_07_25 at 14_45_16 6U1B2178.JPG	https://doi.org/10.1594/PANGAEA.839022				1
HOTKEY_2014_07_25 at 14_45_37 6U1B2179.JPG	https://doi.org/10.1594/PANGAEA.839022				1
HOTKEY_2014_07_25 at 14_46_46 6U1B2183.JPG	https://doi.org/10.1594/PANGAEA.839022				1
HOTKEY_2014_07_25 at 14_47_21 6U1B2185.JPG	https://doi.org/10.1594/PANGAEA.839022				1
HOTKEY_2014_07_25 at 16_36_04 6U1B2425.JPG	https://doi.org/10.1594/PANGAEA.839022		1
HOTKEY_2014_07_25 at 16_35_06 6U1B2421.JPG	https://doi.org/10.1594/PANGAEA.839022		1
HOTKEY_2014_07_25 at 16_35_31 6U1B2423.JPG	https://doi.org/10.1594/PANGAEA.839022		1
TIMER_SYNC_TO_2014_07_25 at 14_49_13 6U1B2190.JPG	https://doi.org/10.1594/PANGAEA.839022
TIMER_SYNC_TO_2014_07_25 at 14_45_09 6U1B2177.JPG	https://doi.org/10.1594/PANGAEA.839022				1
TIMER_SYNC_TO_2014_07_25 at 14_45_40 6U1B2180.JPG	https://doi.org/10.1594/PANGAEA.839022				1
TIMER_SYNC_TO_2014_07_25 at 14_47_10 6U1B2184.JPG	https://doi.org/10.1594/PANGAEA.839022				1
TIMER_SYNC_TO_2014_07_25 at 14_47_42 6U1B2186.JPG	https://doi.org/10.1594/PANGAEA.839022				1
TIMER_SYNC_TO_2014_07_25 at 14_48_13 6U1B2188.JPG	https://doi.org/10.1594/PANGAEA.839022				1
TIMER_SYNC_TO_2014_07_25 at 14_48_43 6U1B2189.JPG	https://doi.org/10.1594/PANGAEA.839022				1
HOTKEY_2014_07_29 at 00_18_16 6U1B3108.JPG	https://doi.org/10.1594/PANGAEA.839027						1
HOTKEY_2014_07_29 at 00_40_50 6U1B3195.JPG	https://doi.org/10.1594/PANGAEA.839027				1
HOTKEY_2014_07_29 at 00_38_01 6U1B3178.JPG	https://doi.org/10.1594/PANGAEA.839027				1
TIMER_SYNC_TO_2014_07_29 at 00_38_08 6U1B3179.JPG	https://doi.org/10.1594/PANGAEA.839027				1
HOTKEY_2014_07_29 at 00_38_14 6U1B3180.JPG	https://doi.org/10.1594/PANGAEA.839027				1
HOTKEY_2014_07_29 at 00_38_26 6U1B3181.JPG	https://doi.org/10.1594/PANGAEA.839027				1
HOTKEY_2014_07_29 at 00_38_39 6U1B3182.JPG	https://doi.org/10.1594/PANGAEA.839027				1
HOTKEY_2014_07_29 at 00_38_49 6U1B3183.JPG	https://doi.org/10.1594/PANGAEA.839027				1
HOTKEY_2014_07_29 at 00_38_55 6U1B3184.JPG	https://doi.org/10.1594/PANGAEA.839027				1
HOTKEY_2014_07_29 at 00_39_01 6U1B3185.JPG	https://doi.org/10.1594/PANGAEA.839027				1
TIMER_SYNC_TO_2014_07_29 at 00_39_10 6U1B3186.JPG	https://doi.org/10.1594/PANGAEA.839027				1
TIMER_SYNC_TO_2014_07_29 at 00_39_40 6U1B3187.JPG	https://doi.org/10.1594/PANGAEA.839027				1
TIMER_SYNC_2014_07_29 at 00_40_07 6U1B3188.JPG	https://doi.org/10.1594/PANGAEA.839027				1
HOTKEY_2014_07_29 at 00_40_14 6U1B3189.JPG	https://doi.org/10.1594/PANGAEA.839027				1
HOTKEY_2014_07_29 at 00_40_21 6U1B3190.JPG	https://doi.org/10.1594/PANGAEA.839027				1
HOTKEY_2014_07_29 at 00_40_28 6U1B3191.JPG	https://doi.org/10.1594/PANGAEA.839027				1
HOTKEY_2014_07_29 at 00_40_34 6U1B3192.JPG	https://doi.org/10.1594/PANGAEA.839027				1
HOTKEY_2014_07_29 at 00_40_40 6U1B3193.JPG	https://doi.org/10.1594/PANGAEA.839027				1
HOTKEY_2014_07_29 at 00_40_45 6U1B3194.JPG	https://doi.org/10.1594/PANGAEA.839027				1
HOTKEY_2014_07_29 at 13_49_29 6U1B3562.JPG	https://doi.org/10.1594/PANGAEA.839025				1
HOTKEY_2014_07_29 at 20_05_29 6U1B3853.JPG	https://doi.org/10.1594/PANGAEA.839026						1
HOTKEY_2014_07_29 at 20_02_16 6U1B3843.JPG	https://doi.org/10.1594/PANGAEA.839026						1
HOTKEY_2014_07_29 at 20_02_46 6U1B3845.JPG	https://doi.org/10.1594/PANGAEA.839026						1
HOTKEY_2014_07_29 at 20_04_04 6U1B3848.JPG	https://doi.org/10.1594/PANGAEA.839026						1
HOTKEY_2014_07_29 at 20_04_21 6U1B3850.JPG	https://doi.org/10.1594/PANGAEA.839026						1
HOTKEY_2014_07_29 at 20_06_46 6U1B3858.JPG	https://doi.org/10.1594/PANGAEA.839026		1
HOTKEY_2014_07_29 at 20_13_19 6U1B3882.JPG	https://doi.org/10.1594/PANGAEA.839026		1
HOTKEY_2014_07_29 at 20_08_03 6U1B3864.JPG	https://doi.org/10.1594/PANGAEA.839026		1
HOTKEY_2014_07_29 at 20_08_21 6U1B3866.JPG	https://doi.org/10.1594/PANGAEA.839026		1
HOTKEY_2014_07_29 at 20_08_39 6U1B3867.JPG	https://doi.org/10.1594/PANGAEA.839026		1
HOTKEY_2014_07_29 at 20_10_16 6U1B3872.JPG	https://doi.org/10.1594/PANGAEA.839026		1
TIMER_SYNC_2014_07_29 at 20_01_02 6U1B3840.JPG	https://doi.org/10.1594/PANGAEA.839026	1	1
TIMER_SYNC_2014_07_29 at 20_14_03 6U1B3885.JPG	https://doi.org/10.1594/PANGAEA.839026		1
TIMER_SYNC_2014_07_29 at 20_09_18 6U1B3869.JPG	https://doi.org/10.1594/PANGAEA.839026		1
TIMER_SYNC_2014_07_29 at 20_09_39 6U1B3870.JPG	https://doi.org/10.1594/PANGAEA.839026		1
TIMER_SYNC_2014_07_29 at 20_09_59 6U1B3871.JPG	https://doi.org/10.1594/PANGAEA.839026		1
TIMER_SYNC_2014_07_29 at 20_10_20 6U1B3873.JPG	https://doi.org/10.1594/PANGAEA.839026		1
TIMER_SYNC_2014_07_29 at 20_10_40 6U1B3874.JPG	https://doi.org/10.1594/PANGAEA.839026		1
TIMER_SYNC_2014_07_29 at 20_11_00 6U1B3875.JPG	https://doi.org/10.1594/PANGAEA.839026		1
TIMER_SYNC_2014_07_29 at 20_11_21 6U1B3876.JPG	https://doi.org/10.1594/PANGAEA.839026		1
TIMER_SYNC_2014_07_29 at 20_11_41 6U1B3877.JPG	https://doi.org/10.1594/PANGAEA.839026		1
TIMER_SYNC_2014_07_29 at 20_12_01 6U1B3878.JPG	https://doi.org/10.1594/PANGAEA.839026		1
TIMER_SYNC_2014_07_29 at 20_12_22 6U1B3879.JPG	https://doi.org/10.1594/PANGAEA.839026		1
TIMER_SYNC_2014_07_29 at 20_12_42 6U1B3880.JPG	https://doi.org/10.1594/PANGAEA.839026		1
TIMER_SYNC_2014_07_29 at 20_13_02 6U1B3881.JPG	https://doi.org/10.1594/PANGAEA.839026		1
TIMER_SYNC_2014_07_29 at 20_13_23 6U1B3883.JPG	https://doi.org/10.1594/PANGAEA.839026		1
TIMER_SYNC_2014_07_29 at 20_13_43 6U1B3884.JPG	https://doi.org/10.1594/PANGAEA.839026		1
TIMER_SYNC_TO_2014_07_29 at 20_05_38 6U1B3854.JPG	https://doi.org/10.1594/PANGAEA.839026						1
TIMER_SYNC_TO_2014_07_29 at 20_03_37 6U1B3847.JPG	https://doi.org/10.1594/PANGAEA.839026						1
TIMER_SYNC_TO_2014_07_29 at 20_04_09 6U1B3849.JPG	https://doi.org/10.1594/PANGAEA.839026						1
TIMER_SYNC_TO_2014_07_29 at 20_04_39 6U1B3851.JPG	https://doi.org/10.1594/PANGAEA.839026						1
TIMER_SYNC_TO_2014_07_29 at 20_05_09 6U1B3852.JPG	https://doi.org/10.1594/PANGAEA.839026						1
HOTKEY_2014_07_29 at 23_58_40 6U1B4013.JPG	https://doi.org/10.1594/PANGAEA.839027						1
HOTKEY_2014_07_29 at 23_57_20 6U1B4006.JPG	https://doi.org/10.1594/PANGAEA.839027						1
HOTKEY_2014_07_29 at 23_57_33 6U1B4007.JPG	https://doi.org/10.1594/PANGAEA.839027						1
HOTKEY_2014_07_29 at 23_57_47 6U1B4009.JPG	https://doi.org/10.1594/PANGAEA.839027						1
HOTKEY_2014_07_29 at 23_58_29 6U1B4011.JPG	https://doi.org/10.1594/PANGAEA.839027						1
HOTKEY_2014_07_29 at 23_58_35 6U1B4012.JPG	https://doi.org/10.1594/PANGAEA.839027						1
TIMER_SYNC_TO_2014_07_29 at 23_59_47 6U1B4019.JPG	https://doi.org/10.1594/PANGAEA.839027						1
TIMER_SYNC_TO_2014_07_29 at 23_58_10 6U1B4010.JPG	https://doi.org/10.1594/PANGAEA.839027						1
TIMER_SYNC_TO_2014_07_29 at 23_58_43 6U1B4014.JPG	https://doi.org/10.1594/PANGAEA.839027						1
TIMER_SYNC_TO_2014_07_29 at 23_59_16 6U1B4017.JPG	https://doi.org/10.1594/PANGAEA.839027						1
HOTKEY_2014_07_30 at 00_03_42 6U1B4043.JPG	https://doi.org/10.1594/PANGAEA.839027						1
HOTKEY_2014_07_30 at 00_00_17 6U1B4021.JPG	https://doi.org/10.1594/PANGAEA.839027						1
HOTKEY_2014_07_30 at 00_00_26 6U1B4023.JPG	https://doi.org/10.1594/PANGAEA.839027						1
HOTKEY_2014_07_30 at 00_00_35 6U1B4024.JPG	https://doi.org/10.1594/PANGAEA.839027					1	1
HOTKEY_2014_07_30 at 00_00_52 6U1B4025.JPG	https://doi.org/10.1594/PANGAEA.839027					1	1
HOTKEY_2014_07_30 at 00_01_14 6U1B4027.JPG	https://doi.org/10.1594/PANGAEA.839027					1	1
HOTKEY_2014_07_30 at 00_01_24 6U1B4028.JPG	https://doi.org/10.1594/PANGAEA.839027					1	1
HOTKEY_2014_07_30 at 00_01_44 6U1B4030.JPG	https://doi.org/10.1594/PANGAEA.839027					1	1
HOTKEY_2014_07_30 at 00_01_54 6U1B4031.JPG	https://doi.org/10.1594/PANGAEA.839027		1			1	1
HOTKEY_2014_07_30 at 00_02_03 6U1B4032.JPG	https://doi.org/10.1594/PANGAEA.839027		1			1	1
HOTKEY_2014_07_30 at 00_02_10 6U1B4033.JPG	https://doi.org/10.1594/PANGAEA.839027		1			1	1
HOTKEY_2014_07_30 at 00_02_19 6U1B4034.JPG	https://doi.org/10.1594/PANGAEA.839027		1	1		1	1
HOTKEY_2014_07_30 at 00_02_24 6U1B4035.JPG	https://doi.org/10.1594/PANGAEA.839027		1	1		1	1
HOTKEY_2014_07_30 at 00_02_29 6U1B4036.JPG	https://doi.org/10.1594/PANGAEA.839027		1	1		1	1
HOTKEY_2014_07_30 at 00_02_36 6U1B4037.JPG	https://doi.org/10.1594/PANGAEA.839027		1	1		1	1
HOTKEY_2014_07_30 at 00_02_42 6U1B4038.JPG	https://doi.org/10.1594/PANGAEA.839027		1	1		1	1
HOTKEY_2014_07_30 at 00_02_48 6U1B4039.JPG	https://doi.org/10.1594/PANGAEA.839027		1	1		1	1
HOTKEY_2014_07_30 at 00_02_55 6U1B4040.JPG	https://doi.org/10.1594/PANGAEA.839027		1	1		1	1
HOTKEY_2014_07_30 at 00_03_20 6U1B4041.JPG	https://doi.org/10.1594/PANGAEA.839027		1			1	1
HOTKEY_2014_07_30 at 00_03_28 6U1B4042.JPG	https://doi.org/10.1594/PANGAEA.839027		1			1	1
HOTKEY_2014_07_30 at 00_35_36 6U1B4117.JPG	https://doi.org/10.1594/PANGAEA.839027				1		1
HOTKEY_2014_07_30 at 00_12_03 6U1B4057.JPG	https://doi.org/10.1594/PANGAEA.839027				1		1
HOTKEY_2014_07_30 at 00_12_43 6U1B4059.JPG	https://doi.org/10.1594/PANGAEA.839027				1		1
HOTKEY_2014_07_30 at 00_13_12 6U1B4061.JPG	https://doi.org/10.1594/PANGAEA.839027				1
HOTKEY_2014_07_30 at 00_13_42 6U1B4063.JPG	https://doi.org/10.1594/PANGAEA.839027				1
HOTKEY_2014_07_30 at 00_13_48 6U1B4064.JPG	https://doi.org/10.1594/PANGAEA.839027				1
HOTKEY_2014_07_30 at 00_14_10 6U1B4066.JPG	https://doi.org/10.1594/PANGAEA.839027				1
HOTKEY_2014_07_30 at 00_17_42 6U1B4074.JPG	https://doi.org/10.1594/PANGAEA.839027				1
HOTKEY_2014_07_30 at 00_17_52 6U1B4075.JPG	https://doi.org/10.1594/PANGAEA.839027				1
HOTKEY_2014_07_30 at 00_18_08 6U1B4077.JPG	https://doi.org/10.1594/PANGAEA.839027				1
HOTKEY_2014_07_30 at 00_18_15 6U1B4078.JPG	https://doi.org/10.1594/PANGAEA.839027				1
HOTKEY_2014_07_30 at 00_19_06 6U1B4081.JPG	https://doi.org/10.1594/PANGAEA.839027				1
HOTKEY_2014_07_30 at 00_19_13 6U1B4082.JPG	https://doi.org/10.1594/PANGAEA.839027				1
HOTKEY_2014_07_30 at 00_32_11 6U1B4108.JPG	https://doi.org/10.1594/PANGAEA.839027				1
HOTKEY_2014_07_30 at 00_35_27 6U1B4116.JPG	https://doi.org/10.1594/PANGAEA.839027				1
TIMER_SYNC_2014_07_30 at 00_21_03 6U1B4086.JPG	https://doi.org/10.1594/PANGAEA.839027						1
TIMER_SYNC_2014_07_30 at 00_13_19 6U1B4062.JPG	https://doi.org/10.1594/PANGAEA.839027						1
TIMER_SYNC_2014_07_30 at 00_13_52 6U1B4065.JPG	https://doi.org/10.1594/PANGAEA.839027						1
TIMER_SYNC_2014_07_30 at 00_19_31 6U1B4083.JPG	https://doi.org/10.1594/PANGAEA.839027						1
TIMER_SYNC_2014_07_30 at 00_20_02 6U1B4084.JPG	https://doi.org/10.1594/PANGAEA.839027						1
TIMER_SYNC_TO_2014_07_30 at 00_01_29 6U1B4029.JPG	https://doi.org/10.1594/PANGAEA.839027					1	1
TIMER_SYNC_TO_2014_07_30 at 00_00_23 6U1B4022.JPG	https://doi.org/10.1594/PANGAEA.839027					1	1
TIMER_SYNC_TO_2014_07_30 at 00_00_58 6U1B4026.JPG	https://doi.org/10.1594/PANGAEA.839027					1	1
TIMER_SYNC_TO_2014_07_30 at 00_19_01 6U1B4080.JPG	https://doi.org/10.1594/PANGAEA.839027				1
TIMER_SYNC_TO_2014_07_30 at 00_20_35 6U1B4085.JPG	https://doi.org/10.1594/PANGAEA.839027				1
TIMER_SYNC_TO_2014_07_30 at 00_12_18 6U1B4058.JPG	https://doi.org/10.1594/PANGAEA.839027				1
TIMER_SYNC_TO_2014_07_30 at 00_14_25 6U1B4067.JPG	https://doi.org/10.1594/PANGAEA.839027				1
TIMER_SYNC_TO_2014_07_30 at 00_16_57 6U1B4072.JPG	https://doi.org/10.1594/PANGAEA.839027				1
TIMER_SYNC_TO_2014_07_30 at 00_17_27 6U1B4073.JPG	https://doi.org/10.1594/PANGAEA.839027				1
TIMER_SYNC_TO_2014_07_30 at 00_18_00 6U1B4076.JPG	https://doi.org/10.1594/PANGAEA.839027				1
TIMER_SYNC_TO_2014_07_30 at 00_18_30 6U1B4079.JPG	https://doi.org/10.1594/PANGAEA.839027				1
HOTKEY_2016_09_24 at 20_06_50 IMG_0377.JPG	https://doi.org/10.1594/PANGAEA.871541						1
HOTKEY_2016_09_24 at 20_05_03 IMG_0369.JPG	https://doi.org/10.1594/PANGAEA.871541		1				1
HOTKEY_2016_09_24 at 20_05_57 IMG_0373.JPG	https://doi.org/10.1594/PANGAEA.871541		1			1	1
HOTKEY_2016_09_24 at 20_06_43 IMG_0376.JPG	https://doi.org/10.1594/PANGAEA.871541					1	1
HOTKEY_2016_09_24 at 20_07_22 IMG_0381.JPG	https://doi.org/10.1594/PANGAEA.871541					1
TIMER_2016_09_24 at 20_07_15 IMG_0380.JPG	https://doi.org/10.1594/PANGAEA.871541						1
TIMER_2016_09_24 at 20_05_52 IMG_0372.JPG	https://doi.org/10.1594/PANGAEA.871541						1
TIMER_2016_09_24 at 20_06_14 IMG_0374.JPG	https://doi.org/10.1594/PANGAEA.871541						1
TIMER_2016_09_24 at 20_06_34 IMG_0375.JPG	https://doi.org/10.1594/PANGAEA.871541						1
TIMER_2016_09_24 at 20_06_55 IMG_0378.JPG	https://doi.org/10.1594/PANGAEA.871541					1
HOTKEY_2016_09_28 at 09_04_00 IMG_0228.JPG	https://doi.org/10.1594/PANGAEA.871543		1
TIMER_SYNC_2016_09_28 at 08_57_17 IMG_0204.JPG	https://doi.org/10.1594/PANGAEA.871543				1
TIMER_SYNC_2016_09_28 at 08_58_18 IMG_0208.JPG	https://doi.org/10.1594/PANGAEA.871543				1
TIMER_SYNC_2016_09_28 at 09_03_27 IMG_0225.JPG	https://doi.org/10.1594/PANGAEA.871543	1	1
TIMER_SYNC_2016_09_28 at 09_03_06 IMG_0224.JPG	https://doi.org/10.1594/PANGAEA.871543	1	1
TIMER_SYNC_2016_09_28 at 09_07_30 IMG_0240.JPG	https://doi.org/10.1594/PANGAEA.871543	1	1
TIMER_SYNC_2016_09_28 at 09_06_50 IMG_0238.JPG	https://doi.org/10.1594/PANGAEA.871543	1	1
TIMER_SYNC_2016_09_28 at 09_07_10 IMG_0239.JPG	https://doi.org/10.1594/PANGAEA.871543	1	1
HOTKEY_2016_10_03 at 11_59_29 IMG_0393.JPG	https://doi.org/10.1594/PANGAEA.871545	1
HOTKEY_2016_10_03 at 11_56_26 IMG_0383.JPG	https://doi.org/10.1594/PANGAEA.871545	1	1
HOTKEY_2016_10_03 at 12_02_58 IMG_0408.JPG	https://doi.org/10.1594/PANGAEA.871545	1	1
HOTKEY_2016_10_03 at 12_03_08 IMG_0410.JPG	https://doi.org/10.1594/PANGAEA.871545	1	1
HOTKEY_2016_10_03 at 12_11_10 IMG_0455.JPG	https://doi.org/10.1594/PANGAEA.871545					1
HOTKEY_2016_10_03 at 12_07_43 IMG_0430.JPG	https://doi.org/10.1594/PANGAEA.871545					1
HOTKEY_2016_10_03 at 12_08_00 IMG_0432.JPG	https://doi.org/10.1594/PANGAEA.871545	1	1			1
HOTKEY_2016_10_03 at 12_08_03 IMG_0433.JPG	https://doi.org/10.1594/PANGAEA.871545	1	1			1
HOTKEY_2016_10_03 at 12_08_10 IMG_0434.JPG	https://doi.org/10.1594/PANGAEA.871545	1	1			1
HOTKEY_2016_10_03 at 12_08_21 IMG_0436.JPG	https://doi.org/10.1594/PANGAEA.871545					1
HOTKEY_2016_10_03 at 12_08_28 IMG_0437.JPG	https://doi.org/10.1594/PANGAEA.871545	1	1			1
HOTKEY_2016_10_03 at 12_08_33 IMG_0438.JPG	https://doi.org/10.1594/PANGAEA.871545	1	1			1
HOTKEY_2016_10_03 at 12_08_39 IMG_0440.JPG	https://doi.org/10.1594/PANGAEA.871545	1	1			1
HOTKEY_2016_10_03 at 12_09_19 IMG_0443.JPG	https://doi.org/10.1594/PANGAEA.871545					1
HOTKEY_2016_10_03 at 12_09_46 IMG_0445.JPG	https://doi.org/10.1594/PANGAEA.871545					1
HOTKEY_2016_10_03 at 12_10_06 IMG_0447.JPG	https://doi.org/10.1594/PANGAEA.871545	1				1
HOTKEY_2016_10_03 at 12_10_15 IMG_0448.JPG	https://doi.org/10.1594/PANGAEA.871545	1				1
HOTKEY_2016_10_03 at 12_10_23 IMG_0449.JPG	https://doi.org/10.1594/PANGAEA.871545	1				1
HOTKEY_2016_10_03 at 12_10_30 IMG_0450.JPG	https://doi.org/10.1594/PANGAEA.871545					1
HOTKEY_2016_10_03 at 12_10_48 IMG_0452.JPG	https://doi.org/10.1594/PANGAEA.871545		1			1
HOTKEY_2016_10_03 at 12_10_55 IMG_0453.JPG	https://doi.org/10.1594/PANGAEA.871545		1			1
HOTKEY_2016_10_03 at 12_11_03 IMG_0454.JPG	https://doi.org/10.1594/PANGAEA.871545		1				1
HOTKEY_2016_10_03 at 12_14_01 IMG_0472.JPG	https://doi.org/10.1594/PANGAEA.871545						1
HOTKEY_2016_10_03 at 12_11_27 IMG_0457.JPG	https://doi.org/10.1594/PANGAEA.871545						1
HOTKEY_2016_10_03 at 12_11_41 IMG_0459.JPG	https://doi.org/10.1594/PANGAEA.871545						1
HOTKEY_2016_10_03 at 12_11_53 IMG_0460.JPG	https://doi.org/10.1594/PANGAEA.871545						1
HOTKEY_2016_10_03 at 12_12_04 IMG_0462.JPG	https://doi.org/10.1594/PANGAEA.871545						1
HOTKEY_2016_10_03 at 12_12_12 IMG_0463.JPG	https://doi.org/10.1594/PANGAEA.871545						1
HOTKEY_2016_10_03 at 12_12_26 IMG_0465.JPG	https://doi.org/10.1594/PANGAEA.871545						1
HOTKEY_2016_10_03 at 12_12_50 IMG_0467.JPG	https://doi.org/10.1594/PANGAEA.871545						1
HOTKEY_2016_10_03 at 12_13_23 IMG_0470.JPG	https://doi.org/10.1594/PANGAEA.871545						1
TIMER_SYNC_2016_10_03 at 12_03_02 IMG_0409.JPG	https://doi.org/10.1594/PANGAEA.871545	1	1
TIMER_SYNC_2016_10_03 at 12_06_08 IMG_0423.JPG	https://doi.org/10.1594/PANGAEA.871545						1
TIMER_SYNC_2016_10_03 at 12_08_35 IMG_0439.JPG	https://doi.org/10.1594/PANGAEA.871545					1
TIMER_SYNC_2016_10_03 at 12_07_29 IMG_0429.JPG	https://doi.org/10.1594/PANGAEA.871545					1
TIMER_SYNC_2016_10_03 at 12_07_51 IMG_0431.JPG	https://doi.org/10.1594/PANGAEA.871545					1
TIMER_SYNC_2016_10_03 at 12_08_12 IMG_0435.JPG	https://doi.org/10.1594/PANGAEA.871545	1	1			1
TIMER_SYNC_2016_10_03 at 12_08_35 IMG_0439.JPG	https://doi.org/10.1594/PANGAEA.871545	1	1			1
TIMER_SYNC_2016_10_03 at 12_09_14 IMG_0442.JPG	https://doi.org/10.1594/PANGAEA.871545					1
TIMER_SYNC_2016_10_03 at 12_09_33 IMG_0444.JPG	https://doi.org/10.1594/PANGAEA.871545					1
TIMER_SYNC_2016_10_03 at 12_09_54 IMG_0446.JPG	https://doi.org/10.1594/PANGAEA.871545					1
TIMER_SYNC_2016_10_03 at 12_10_35 IMG_0451.JPG	https://doi.org/10.1594/PANGAEA.871545					1
TIMER_SYNC_2016_10_03 at 12_11_16 IMG_0456.JPG	https://doi.org/10.1594/PANGAEA.871545					1	1
TIMER_SYNC_2016_10_03 at 12_11_36 IMG_0458.JPG	https://doi.org/10.1594/PANGAEA.871545					1	1
TIMER_SYNC_2016_10_03 at 12_11_58 IMG_0461.JPG	https://doi.org/10.1594/PANGAEA.871545					1	1
TIMER_SYNC_2016_10_03 at 12_12_19 IMG_0464.JPG	https://doi.org/10.1594/PANGAEA.871545					1	1
TIMER_SYNC_2016_10_03 at 12_12_40 IMG_0466.JPG	https://doi.org/10.1594/PANGAEA.871545					1	1
TIMER_SYNC_2016_10_03 at 12_13_00 IMG_0468.JPG	https://doi.org/10.1594/PANGAEA.871545					1	1
HOTKEY_2016_10_04 at 11_48_23 IMG_0057.JPG	https://doi.org/10.1594/PANGAEA.871546	1	1
HOTKEY_2016_10_04 at 11_48_31 IMG_0058.JPG	https://doi.org/10.1594/PANGAEA.871546	1	1
HOTKEY_2016_10_04 at 11_48_44 IMG_0060.JPG	https://doi.org/10.1594/PANGAEA.871546	1	1
HOTKEY_2016_10_04 at 11_55_58 IMG_0091.JPG	https://doi.org/10.1594/PANGAEA.871546	1	1
HOTKEY_2016_10_04 at 11_56_29 IMG_0094.JPG	https://doi.org/10.1594/PANGAEA.871546	1	1
HOTKEY_2016_10_04 at 11_56_57 IMG_0096.JPG	https://doi.org/10.1594/PANGAEA.871546	1	1
HOTKEY_2016_10_04 at 11_57_10 IMG_0098.JPG	https://doi.org/10.1594/PANGAEA.871546	1	1
HOTKEY_2016_10_04 at 12_00_59 IMG_0118.JPG	https://doi.org/10.1594/PANGAEA.871546	1	1
HOTKEY_2016_10_04 at 12_01_07 IMG_0119.JPG	https://doi.org/10.1594/PANGAEA.871546	1	1
HOTKEY_2016_10_04 at 13_02_22 IMG_0330.JPG	https://doi.org/10.1594/PANGAEA.871546				1
HOTKEY_2016_10_04 at 13_01_26 IMG_0323.JPG	https://doi.org/10.1594/PANGAEA.871546				1
HOTKEY_2016_10_04 at 13_01_41 IMG_0325.JPG	https://doi.org/10.1594/PANGAEA.871546				1
HOTKEY_2016_10_09 at 17_26_29 IMG_0128.JPG	https://doi.org/10.1594/PANGAEA.871547						1
HOTKEY_2016_10_09 at 17_26_35 IMG_0129.JPG	https://doi.org/10.1594/PANGAEA.871547						1
HOTKEY_2016_10_09 at 17_26_40 IMG_0130.JPG	https://doi.org/10.1594/PANGAEA.871547					1	1
HOTKEY_2016_10_09 at 17_32_34 IMG_0157.JPG	https://doi.org/10.1594/PANGAEA.871547	1	1
HOTKEY_2016_10_09 at 17_32_40 IMG_0158.JPG	https://doi.org/10.1594/PANGAEA.871547	1	1
HOTKEY_2016_10_09 at 17_32_47 IMG_0159.JPG	https://doi.org/10.1594/PANGAEA.871547	1	1
HOTKEY_2016_10_09 at 17_33_01 IMG_0161.JPG	https://doi.org/10.1594/PANGAEA.871547	1	1
HOTKEY_2016_10_09 at 17_36_28 IMG_0180.JPG	https://doi.org/10.1594/PANGAEA.871547	1	1
HOTKEY_2016_10_09 at 17_47_04 IMG_0226.JPG	https://doi.org/10.1594/PANGAEA.871547	1	1
HOTKEY_2016_10_09 at 17_50_11 IMG_0239.JPG	https://doi.org/10.1594/PANGAEA.871547				1
HOTKEY_2016_10_09 at 18_13_34 IMG_0343.JPG	https://doi.org/10.1594/PANGAEA.871547	1	1
HOTKEY_2016_10_09 at 18_13_51 IMG_0345.JPG	https://doi.org/10.1594/PANGAEA.871547	1	1
HOTKEY_2016_10_09 at 18_18_18 IMG_0366.JPG	https://doi.org/10.1594/PANGAEA.871547	1
HOTKEY_2016_10_09 at 18_17_59 IMG_0363.JPG	https://doi.org/10.1594/PANGAEA.871547	1
HOTKEY_2016_10_09 at 18_18_09 IMG_0364.JPG	https://doi.org/10.1594/PANGAEA.871547	1
HOTKEY_2016_10_09 at 19_29_40 IMG_0664.JPG	https://doi.org/10.1594/PANGAEA.871547	1
HOTKEY_2016_10_09 at 19_29_59 IMG_0666.JPG	https://doi.org/10.1594/PANGAEA.871547	1	1
HOTKEY_2016_10_09 at 19_33_51 IMG_0683.JPG	https://doi.org/10.1594/PANGAEA.871547	1	1
TIMER_SYNC_2016_10_09 at 19_43_15 IMG_0725.JPG	https://doi.org/10.1594/PANGAEA.871547	1	1
TIMER_SYNC_2016_10_09 at 19_42_33 IMG_0720.JPG	https://doi.org/10.1594/PANGAEA.871547	1	1
TIMER_SYNC_2016_10_09 at 19_42_54 IMG_0722.JPG	https://doi.org/10.1594/PANGAEA.871547	1	1
TIMER_SYNC_2016_10_09 at 19_43_56 IMG_0727.JPG	https://doi.org/10.1594/PANGAEA.871547	1	1
HOTKEY_2016_10_10 at 19_08_30 IMG_0285.JPG	https://doi.org/10.1594/PANGAEA.871548	1	1
HOTKEY_2016_10_10 at 19_08_49 IMG_0287.JPG	https://doi.org/10.1594/PANGAEA.871548	1	1
HOTKEY_2016_10_10 at 19_09_48 IMG_0294.JPG	https://doi.org/10.1594/PANGAEA.871548	1	1
HOTKEY_2016_10_10 at 19_13_08 IMG_0312.JPG	https://doi.org/10.1594/PANGAEA.871548	1
HOTKEY_2016_10_10 at 19_13_00 IMG_0311.JPG	https://doi.org/10.1594/PANGAEA.871548	1
HOTKEY_2016_10_10 at 19_19_46 IMG_0346.JPG	https://doi.org/10.1594/PANGAEA.871548					1
HOTKEY_2016_10_10 at 19_17_51 IMG_0336.JPG	https://doi.org/10.1594/PANGAEA.871548					1
HOTKEY_2016_10_10 at 19_18_09 IMG_0338.JPG	https://doi.org/10.1594/PANGAEA.871548					1
HOTKEY_2016_10_10 at 19_18_34 IMG_0340.JPG	https://doi.org/10.1594/PANGAEA.871548					1
HOTKEY_2016_10_10 at 19_19_04 IMG_0342.JPG	https://doi.org/10.1594/PANGAEA.871548					1
HOTKEY_2016_10_10 at 19_19_37 IMG_0345.JPG	https://doi.org/10.1594/PANGAEA.871548					1
HOTKEY_2016_10_10 at 19_21_12 IMG_0362.JPG	https://doi.org/10.1594/PANGAEA.871548					1	1
HOTKEY_2016_10_10 at 19_20_02 IMG_0349.JPG	https://doi.org/10.1594/PANGAEA.871548					1	1
HOTKEY_2016_10_10 at 19_20_08 IMG_0350.JPG	https://doi.org/10.1594/PANGAEA.871548					1	1
HOTKEY_2016_10_10 at 19_20_18 IMG_0352.JPG	https://doi.org/10.1594/PANGAEA.871548					1	1
HOTKEY_2016_10_10 at 19_20_24 IMG_0353.JPG	https://doi.org/10.1594/PANGAEA.871548					1	1
HOTKEY_2016_10_10 at 19_20_29 IMG_0354.JPG	https://doi.org/10.1594/PANGAEA.871548	1	1			1	1
HOTKEY_2016_10_10 at 19_20_39 IMG_0356.JPG	https://doi.org/10.1594/PANGAEA.871548	1	1			1	1
HOTKEY_2016_10_10 at 19_20_47 IMG_0357.JPG	https://doi.org/10.1594/PANGAEA.871548	1	1			1	1
HOTKEY_2016_10_10 at 19_20_52 IMG_0358.JPG	https://doi.org/10.1594/PANGAEA.871548	1	1			1	1
HOTKEY_2016_10_10 at 19_21_01 IMG_0360.JPG	https://doi.org/10.1594/PANGAEA.871548		1			1	1
HOTKEY_2016_10_10 at 19_21_06 IMG_0361.JPG	https://doi.org/10.1594/PANGAEA.871548		1			1
TIMER_2016_10_10 at 19_09_43 IMG_0293.JPG	https://doi.org/10.1594/PANGAEA.871548	1	1
TIMER_2016_10_10 at 19_20_56 IMG_0359.JPG	https://doi.org/10.1594/PANGAEA.871548	1				1
TIMER_2016_10_10 at 19_18_47 IMG_0341.JPG	https://doi.org/10.1594/PANGAEA.871548					1
TIMER_2016_10_10 at 19_19_10 IMG_0343.JPG	https://doi.org/10.1594/PANGAEA.871548					1
TIMER_2016_10_10 at 19_19_31 IMG_0344.JPG	https://doi.org/10.1594/PANGAEA.871548					1
TIMER_2016_10_10 at 19_19_52 IMG_0347.JPG	https://doi.org/10.1594/PANGAEA.871548					1
TIMER_2016_10_10 at 19_20_14 IMG_0351.JPG	https://doi.org/10.1594/PANGAEA.871548					1
TIMER_2016_10_10 at 19_20_34 IMG_0355.JPG	https://doi.org/10.1594/PANGAEA.871548	1	1			1
TIMER_SYNC_2016_10_11 at 09_22_44 IMG_0419.JPG	https://doi.org/10.1594/PANGAEA.871549				1
TIMER_SYNC_2016_10_11 at 09_21_23 IMG_0411.JPG	https://doi.org/10.1594/PANGAEA.871549				1
TIMER_SYNC_2016_10_11 at 09_21_43 IMG_0414.JPG	https://doi.org/10.1594/PANGAEA.871549				1
TIMER_SYNC_2016_10_11 at 09_22_04 IMG_0416.JPG	https://doi.org/10.1594/PANGAEA.871549				1
TIMER_SYNC_2016_10_11 at 09_22_24 IMG_0417.JPG	https://doi.org/10.1594/PANGAEA.871549				1

## Sheet: Suppl.Table2
Supplementary Table 2: Rate measurements to determine methane oxidation rates in the Aurora and the Polaris plume.
Station	bottle	Character		Incubation time (days)	Replicate	14CH4 added (dpm)	DIC (dpm)	Turnover (% per day)	Average	% turnover per day (control corrected)	Lifetime Methane (days)
AURORA PLUME
086-55	6-control	plume		3	1	48679	20	0.0136952	0.0116096
	6-control			3	2	56582	19	0.0111932	0.00191172	Stdev.
	6-control			3	3	50300	15	0.00994036
086-55	6	plume		3	1	62585	22	0.0117174	0.0140924	0.0121806	bdl.
	6			3	2	29335	14	0.0159082
	6			3	3	27301	12	0.0146515
	6			3	4	33797	10	0.00986281
	6			3	5	38106	23	0.0201193
086-55	9	Out of plume		3	1	33231	14	0.0140431	0.0146214	0.0127096	7868.05
	9			3	2	38719	15	0.0129136
	9			3	3	33637	16	0.0158556
	9			3	4	32607	14	0.0143119
	9			3	5	45883	22	0.0159827
086-55	10	bottom water		3	1	55417	22	0.013233	0.0141643	0.0122526	8161.52
	10			3	2	36253	16	0.0147114
	10			3	3	44409	19	0.0142614
	10			3	4	53964	24	0.0148247
	10			3	5	50757	21	0.0137912
086-57	1-killed			3	1	45422	18	0.0132095	0.0151586
	1-killed			3	2	46352	21	0.0151018	0.0019781	Stdev.
	1-killed			3	3	48550	25	0.0171644
086-57	1	plume		3	1	50246	23	0.0152583	0.015606	0.0136279	bdl.
	1			3	2	39615	17	0.0143043
	1			3	3	32840	17	0.0172554
086-57	2	plume		3	1	31595	18	0.0189903	0.0144324	0.0124543	bdl.
	2			3	2	35633	12	0.0112255
	2			3	3	30578	12	0.0130813
086-57	5	below plume		3	1	39129	19	0.0161858	0.0196459	0.0176678	bdl.
	5			3	2	41014	29	0.0235692
	5			3	3	33016	19	0.0191826
086-57	8	plume		3	1	52476	31	0.0196915	0.0183918	0.0164137	bdl.
	8			3	2	33152	20	0.0201094
	8			3	3	43362	20	0.0153744
086-57	6			3	1	40389	26	0.021458	0.0204777	0.0184996	bdl.
	6			3	2	29158	21	0.0240071
	6			3	3	39663	19	0.0159679
	17	bottom water		3	1	41298	17	0.0137214	0.0247126	0.0227345	bdl.
	17			3	2	34380	28	0.0271476
	17			3	3	46089	46	0.033269
086-66	14-Killed			3	1	42276	29	0.0228656	0.0216259
				3	2	37638	19	0.016827	0.00431474	Stdev.
				3	3	34412	26	0.025185
				3	4	29164	21	0.0240022
086-66	1	Plume		3	1	50863	25	0.0163839	0.0169854	0.01526	bdl.
				3	1	36005	16	0.0148128	0.00172536
				3	1	45304	25	0.0183943
				3	1	41779	23	0.0183505
086-66	10	Plume		3	1	41526	15	0.0120406	0.0250691	0.0233438	bdl.
				3	2	38448	20	0.0173394	0.0243644
				3	3	48595	14	0.00960318
				3	4	9789	18	0.0612933
086-66	12	bottom water		3	1	43307	20	0.015394	0.0195455	0.0178202	bdl.
				3	2	52675	22	0.0139218	0.0102386
				3	3	15295	16	0.0348698
				3	4	30960	13	0.0139966
086-66	15	Plume		3	1	33121	15	0.0150962	0.0235788	0.0218535	4575.94
				3	2	22207	16	0.0240165	0.0102131
				3	3	24914	13	0.0173932
				3	4	27330	31	0.0378095
086-66	17	above		3	1	12512	25	0.0666027	0.0445969	0.0428715	2332.55
				3	2	23776	21	0.0294415	0.0212444
				3	3	43760	31	0.0236137
				3	4	15892	28	0.0587298
086-69	19-Killed			3	1	41363	17	0.0136998	0.0127328
	19-Killed			3	2	47908	18	0.012524	0.000881367	Stdev.
	19-Killed			3	3	25053	9	0.0119746
	19-Killed			3	4	18368	12	0.021777
	19-Killed			3	5	34579	26	0.0250634
086-69	9	plume		3	1	26145	19	0.0242239	0.0317967	0.0309153	3234.64
				3	2	19457	16	0.0274109	0.0096111
				3	3	20855	15	0.0239751
				3	4	24930	28	0.0374382
				3	5	21044	29	0.0459355
086-69	13	bottom water		3	1	20201	28	0.0462023	0.0466455	0.0457641	2185.12
				3	2	29401	26	0.0294775	0.0180173
				3	3	21125	33	0.052071
				3	4	22087	49	0.07395
				3	5	24318	23	0.0315267
086-69	14	below plume		3	1	26634	24	0.0300368	0.0383899	0.0375085	2666.06
				3	2	22711	27	0.0396284	0.00539587
				3	3	26614	36	0.0450891
				3	4	20563	24	0.0389048
				3	5	22634	26	0.0382905
086-69	17	deeper plume		3	1	31060	17	0.0182443	0.0218117	0.0209304	4777.75
				3	2	32328	23	0.0237153	0.0029737
				3	3	31396	20	0.0212341
				3	4	37502	29	0.0257764
				3	5	31527	19	0.0200886
086-69	20	above plume		3	1	47097	22	0.0155707	0.018972	0.0180907	5527.71
				3	2	40185	27	0.0223964	0.00425948		bdl.
				3	3	26194	18	0.022906
				3	5	35520	16	0.015015
086-74	4-killed			3	2	44951	22	0.0163141	0.0146591
	4-killed			3	3	46139	18	0.0130042	0.00234044	Stdev.
	4-killed			3	4	54771	27	0.0164321
086-74	3			3	1	31170	23	0.0245963	0.0195437	0.0172033	bdl.
	3			3	2	38955	14	0.0119796	0.00769021
	3			3	3	28787	26	0.0301062
	3			3	4	60149	24	0.0133003
	3			3	1	41347	22	0.0177361
086-74	7			3	2	35981	27	0.0250132	0.0249766	0.0226361	4417.72
	7			3	3	38817	30	0.0257619	0.000804286
	7			3	4	33120	24	0.0241546
086-74	20			3	1	24929	21	0.0280797	0.0278011	0.0254607	3927.63
	20			3	2	30821	27	0.0292009	0.00469726
	20			3	3	26615	26	0.0325631
	20			3	4	28089	18	0.0213607
POLARIS PLUME
101-139	10		2530	2		24894	37	0.0743151	0.102008
	10		2530	2		30956	65	0.104988	0.0430867	Stdev.
	10		2530	2		13793	48	0.174001
	10		2530	2		24567	45	0.0915863
	10		2530	2		27628	36	0.0651513
101-139	10		2530	2		19601	40	0.102036	0.0585807	0.0154941	bdl.
	10		2530	2		35513	33	0.0464619
	10		2530	2		72596	39	0.026861
	10		2530	2		53422	63	0.0589645
101-139	10		2530	7		58247	58	0.0142251	0.0124956	0	bdl.
	10		2530	7		67523	61	0.0129057
	10		2530	7		48253	44	0.0130266
	10		2530	7		55252	38	0.00982511
101-139	10		2530	14		70411	56	0.00568093	0.00655182	0	bdl.
	10		2530	14		25423	47	0.0132051
	10		2530	14		53901	31	0.00410806
	10		2530	14		60021	27	0.00321316
101-177	11		2820	7		69218	33	0.00681078	0.00733816	0	bdl.
	11		2820	7		69904	30	0.00613086
	11		2820	7		67325	37	0.00785104
	11		2820	7		73230	41	0.00799828
	11		2820	7		56059	31	0.00789984
101-177	14		2600	7		137299	108	0.0112372	0.00888848	0	bdl.
	14		2600	7		84043	52	0.00883901
	14		2600	7		96780	44	0.00649485
	14		2600	7		74032	44	0.00849054
	14		2600	7		102032	67	0.00938081
101-177	15		2595	7		75720	49	0.00924459	0.00803384	0	bdl.
	15		2595	7		103778	50	0.00688282
	15		2595	7		99583	53	0.00760313
	15		2595	7		82480	39	0.00675488
	15		2595	7		119493	81	0.00968377
101-188	2		2670	2		10074	57	0.282906	0.109631	0.0665438	bdl.
	2		2670	2		70572	79	0.0559712
	2		2670	2		65429	65	0.0496722
	2		2670	2		79044	79	0.0499722
	2		2670	2		57291	54	0.0471278
101-188	7		2669	7		87715	59	0.00960904	0.0136729	0	bdl.
	7		2669	7		40786	49	0.0171628
	7		2669	7		75194	73	0.0138689
	7		2669	7		65247	67	0.0146695
	7		2669	7		61283	56	0.0130542
101-188	10		2669	10		44044	44	0.00999001	0.00879512	0	bdl.
	10		2669	10		80479	48	0.00596429
	10		2669	10		53475	37	0.00691912
	10		2669	10		70825	57	0.00804801
	10		2669	10		67451	86	0.01275

## Sheet: Suppl.Table3
Supplementary Table 3: Numbers of cells of Sulfurimonas pluma and SUP05 bacteria obtained by CARD-FISH using taxon-specific probes and microscopic counting
Area	Station	Depth	Water type	Total cells	S. pluma	SUP05
		m		cells mL−1	%	%
AURORA	PS86-33	3190	Background	25400	1.06693	0.819523
	PS86-40	3198	Plume	18800	10.7447	5.9
	PS86-52	3200	Internal Reference	29500	4.37288	2
	PS86-55	2501	Above Plume	21900	1.79909	2.14532
	PS86-55	2975	Plume	29800	16.2416	7.3
	PS86-55	3949	Bottom water	26100	1.37548	2
	PS86-57	3360	Plume	24193.8	18.7653	10.8
	PS86-69	3517	Plume	22952.9	20.2155	11
	PS86-74	2500	External Reference	22821.1	0.8	0.811187
	PS86-74	2983	External Reference	26566.1	0.3	0.854784
POLARIS	PS101-112	3042	Internal Reference	25415	0.1566	0.523313
	PS101-139	2338	Above Plume	15100	0.203119	1
	PS101-139	2574	Plume	76773	5.79463	11.8
	PS101-139	3107	Below plume	26300	1.04686	6.1
	PS101-188	2716	Plume	14704	2.4	10.9494

## Sheet: Suppl.Table4
Supplementary Fig. 4: Satistical evaluation of the molecular analysis applied in this study
ANOSIM (﻿Hellinger + ﻿Bray–Curtis)
16SrRNA gene (Tag Bacteria)	statistic R	p value
Aurora P vs REF/AP	0.584	0.005
Aurora P vs BW	-0.0125	0.421
Polaris P vs REF/AP	0.3316	0.019
Polaris P vs BW	0.4046	0.002
Aurora P vs Polaris P	0.5158	0.004
16S and 18S rRNA (MT)
Aurora P vs REF/AP	0.999	0.005
Polaris P vs REF/AP	0.8272	0.001
Polaris P vs Aurora P	1	0.011
Transcripts (MT)
Aurora P vs REF/AP	0.9937	0.005
Polaris P vs REF/AP	0.8642	0.001
Polaris P vs Aurora P	1	0.011
ANOSIM (﻿PA + ﻿Jaccard)
	statistic R	p value
Aurora P vs Polaris P	0.3447	0.018
One-way ANOVA alpha-diversity
number of OTUs		Df	Sum Sq	Mean Sq	F-value	Pr(>F)
	Type	4	1001245	250311	1.305	0.29
	Residuals	31	5947404	191852
Exponential Shannon		Df	Sum Sq	Mean Sq	F-value	Pr(>F)
	Type	4	103037	25759	7.896	0.000165	***
	Residuals	31	101127	3262
Tukey HSD test		Estimate	Std. Error	t value	Pr(>|t|)
	AP vs REF	-14.457	35.799	-0.404	0.99395
	P vs REF	-128.057	32.657	-3.921	0.00379	**
	BP vs REF	-36.406	38.314	-0.95	0.87229
	BW vs REF	-19.874	35.799	-0.555	0.97998
	P vs AP	-113.599	26.776	-4.243	0.00157	**
	BP vs AP	-21.948	33.443	-0.656	0.96327
	BW vs AP	-5.417	30.529	-0.177	0.99976
	BP vs P	91.651	30.056	3.049	0.03421	*
	BW vs P	108.183	26.776	4.04	0.00275	**
	BW vs BP	16.532	33.443	0.494	0.98699
Inverse Simpson		Df	Sum Sq	Mean Sq	F-value	Pr(>F)
	Type	4	10580	2645	7.388	0.000267	***
	Residuals	31	11098	358
Tukey HSD test		Estimate	Std. Error	t value	Pr(>|t|)
	AP vs REF	-10.664	11.859	-0.899	0.8928
	P vs REF	-38.478	10.819	-3.557	0.0098	**
	BP vs REF	-5.285	12.693	-0.416	0.9932
	BW vs REF	1.803	11.859	0.152	0.9999
	P vs AP	-27.814	8.87	-3.136	0.0279	*
	BP vs AP	5.379	11.079	0.485	0.9878
	BW vs AP	12.467	10.114	1.233	0.7284
	BP vs P	33.193	9.957	3.334	0.0172	*
	BW vs P	40.281	8.87	4.541	<0.001	***
	BW vs BP	7.088	11.079	0.64	0.9665

## Sheet: Suppl.Table5
Supplementary Table 5: Beta-diversity on rarefied (at 15,427 sequences) counts of 16S rRNA genes (V3-V4 region). Means and standard deviations of percentage of shared OTUs calculated with 100 times rarefactions are reported in lower and upper triangles, respectively.
	Ka.REF.St.55	Ka.REF.St.112	Ka.AP.1500.St.159	Ka.AP.St.139	Ka.AP.St.159	Ka.AP.St.177	Ka.AP.St.188	Ka.P.St.139	Ka.P1.St.159	Ka.P2.St.159	Ka.P3.St.159	Ka.P4.St.159	Ka.P1.St.177	Ka.P2.St.177	Ka.P.St.188	Ka.BP.St.139	Ka.BP.St.159	Ka.BP.St.177	Ka.BP.St.188	Ka.BW.St.139	Ka.BW.St.159	Ka.BW.St.177	Ka.BW.St.226	Au.REF.St.74	Au.REF.St.74.1	Au.REF.St.52	Au.AP.2000.St.57	Au.AP.St.55	Au.AP.St.66	Au.AP.St.69	Au.P.St.23	Au.P.St.55	Au.P.St.57	Au.P.St.66	Au.P.St.69	Au.BW.St.23	Au.BW.St.55	Au.BP.St.57	Au.BW.St.66
Ka.REF.St.55	NA	0.00788824	0.00439073	0.00786758	0.00713654	0.00288468	0.00679124	0.00612102	0.00839173	0.00796851	0.00562186	0.00775562	0.00533165	0.00704672	0.00771717	0.00707368	0.00671922	0.00828399	0.00732059	0.0066174	0.00704139	0.00774597	0.00678498	0.00801442	0.00706396	0.00802519	0.0061478	0.00719085	0.0068805	0.00745855	0.00969039	0.00712834	0.00903373	0.00759313	0.00722052	0.00788239	0.00839446	0.00681738	0.00757628
Ka.REF.St.112	0.439982	NA	0.00507305	0.00747233	0.00724497	0.00371478	0.00717632	0.00758221	0.00813184	0.00729662	0.00795806	0.00861545	0.00534922	0.00830238	0.00775987	0.0071569	0.00771838	0.00773788	0.00834372	0.0073702	0.00774416	0.00686493	0.00739368	0.00780692	0.00793574	0.00835013	0.00702389	0.00723138	0.00754392	0.00815082	0.00937726	0.00751284	0.00735572	0.00846388	0.00741496	0.00758947	0.00908249	0.00825664	0.00802395
Ka.AP.1500.St.159	0.208339	0.224323	NA	0.00575181	0.00580444	0.00377435	0.00465548	0.00587189	0.00551315	0.0049723	0.00456367	0.00591563	0.00395932	0.00584092	0.00466607	0.00474516	0.00423988	0.00514517	0.00461001	0.00483103	0.00457619	0.00406682	0.0049459	0.0056339	0.00533631	0.00534217	0.0063331	0.00637134	0.00563573	0.00602071	0.00642961	0.00652901	0.00547815	0.00619281	0.00625009	0.00579259	0.00579058	0.00578973	0.00511877
Ka.AP.St.139	0.369725	0.396036	0.280049	NA	0.007275	0.00338607	0.00914573	0.00841783	0.00859108	0.00875637	0.0064521	0.0079971	0.00467409	0.00781257	0.00790233	0.00651875	0.00670307	0.00716291	0.00656302	0.00678551	0.00643756	0.0070066	0.00629965	0.0074376	0.00719805	0.00741244	0.00804541	0.00778686	0.00858214	0.00730742	0.00796497	0.00655801	0.00710465	0.00747601	0.00709903	0.0067594	0.00757195	0.00760976	0.00791223
Ka.AP.St.159	0.389376	0.400459	0.310724	0.463521	NA	0.00327011	0.00769425	0.00759922	0.00828364	0.00824021	0.00645649	0.00732666	0.00493947	0.00848479	0.00774666	0.00679217	0.00531181	0.00752213	0.00655209	0.00715418	0.00604854	0.00688653	0.00634558	0.00697864	0.00830762	0.00684446	0.00850981	0.00869311	0.00867703	0.00763111	0.0094354	0.00759494	0.00818601	0.00756491	0.00748747	0.00816454	0.00806025	0.0070606	0.00731359
Ka.AP.St.177	0.155219	0.16067	0.178559	0.155764	0.15977	NA	0.00361681	0.00449593	0.00428555	0.00324241	0.00576373	0.00401728	0.00457289	0.00420721	0.00372821	0.0032215	0.0035006	0.00378436	0.00437314	0.00360225	0.00418199	0.0027176	0.00305268	0.0031967	0.0037036	0.00451	0.0032792	0.00438238	0.00399149	0.00396903	0.00580998	0.00741932	0.00425583	0.00444922	0.00426117	0.00399224	0.00493198	0.00465135	0.00423168
Ka.AP.St.188	0.386895	0.394235	0.259696	0.429727	0.444627	0.153365	NA	0.00745526	0.00808959	0.00752985	0.00639569	0.00798147	0.00443882	0.00741452	0.0077765	0.00726551	0.00709297	0.00741468	0.0080722	0.00705296	0.00734988	0.00717666	0.00748682	0.00669174	0.00699402	0.00778815	0.00756378	0.00783659	0.00741089	0.00806163	0.00776904	0.00817391	0.00737363	0.00833297	0.00750981	0.00830413	0.00777731	0.00654728	0.00801496
Ka.P.St.139	0.337834	0.360936	0.221496	0.354697	0.34639	0.155855	0.348183	NA	0.00756824	0.00855206	0.00748271	0.00880138	0.00604881	0.00775731	0.00754063	0.00670028	0.0071353	0.00798617	0.00790508	0.00778794	0.00711086	0.00664803	0.00669886	0.00688402	0.00667959	0.00726649	0.00730419	0.00724283	0.00766861	0.00820178	0.0080444	0.00844877	0.00779021	0.00789711	0.00781711	0.0067523	0.00806197	0.00661945	0.00689145
Ka.P1.St.159	0.411042	0.42839	0.241108	0.390889	0.414467	0.164166	0.402594	0.382192	NA	0.00926345	0.00733173	0.00763982	0.00623366	0.00872325	0.00749746	0.00814154	0.00901546	0.00830717	0.00891613	0.00658697	0.00837401	0.00674772	0.00717891	0.00826671	0.0089315	0.00699649	0.00792823	0.00855427	0.0074286	0.00846471	0.00916787	0.00849892	0.00827084	0.00846814	0.00704885	0.00784153	0.00814872	0.00758798	0.00856653
Ka.P2.St.159	0.401661	0.417126	0.221385	0.380234	0.401341	0.143864	0.389232	0.390748	0.44029	NA	0.00730448	0.00859011	0.00536765	0.00836067	0.00791225	0.00812147	0.00840837	0.00831724	0.00708353	0.00804317	0.00798262	0.0079208	0.00813579	0.0077635	0.00717607	0.0085399	0.00662552	0.00719586	0.006271	0.00850808	0.00835711	0.00759596	0.00680189	0.00716872	0.00713248	0.00797841	0.00717129	0.00715415	0.00807633
Ka.P3.St.159	0.300981	0.337357	0.229695	0.301676	0.299837	0.222973	0.297279	0.306722	0.334982	0.315455	NA	0.00730971	0.00592963	0.00788696	0.00692547	0.00743951	0.00663763	0.00735033	0.00737997	0.00561939	0.0061743	0.00612996	0.00715985	0.00667003	0.00633281	0.00695785	0.00590135	0.00631769	0.00722461	0.00740778	0.00986395	0.00833616	0.00782644	0.00724332	0.00721315	0.00749415	0.00765483	0.00727097	0.00690067
Ka.P4.St.159	0.386224	0.419411	0.260742	0.398389	0.41156	0.173268	0.400797	0.370457	0.425967	0.405105	0.34749	NA	0.0055789	0.00923124	0.00772041	0.00770231	0.00745234	0.00789218	0.00769871	0.008239	0.00815866	0.00692501	0.00681789	0.00773954	0.00732737	0.0072525	0.00720476	0.00737191	0.00716493	0.00765027	0.0100129	0.00797105	0.00838861	0.00867554	0.00802304	0.00910638	0.00848461	0.00667867	0.00832139
Ka.P1.St.177	0.240336	0.263249	0.195486	0.226285	0.230609	0.250812	0.226523	0.241163	0.265523	0.241741	0.294363	0.273396	NA	0.00597416	0.00536206	0.00509106	0.00493849	0.00456092	0.00543444	0.00500031	0.00520006	0.00591602	0.0049792	0.00413123	0.00484629	0.00644669	0.00450829	0.00544947	0.00546284	0.00608368	0.00801909	0.00839002	0.00724513	0.00642712	0.00571795	0.00509898	0.00595451	0.00643249	0.00641402
Ka.P2.St.177	0.363923	0.386456	0.240289	0.367311	0.391758	0.162102	0.372568	0.381948	0.407071	0.407985	0.323458	0.396834	0.24986	NA	0.00883255	0.00695102	0.0080137	0.0089424	0.00765002	0.00679663	0.00736001	0.00790819	0.00706295	0.0083837	0.00799739	0.00813313	0.00714493	0.00731033	0.00799098	0.00791387	0.00874865	0.00767144	0.00761248	0.00809425	0.00876249	0.0083773	0.00844876	0.00862478	0.00795564
Ka.P.St.188	0.372958	0.382228	0.208637	0.354911	0.35988	0.153098	0.369112	0.368463	0.396765	0.406704	0.299941	0.388274	0.239363	0.382685	NA	0.00825726	0.0066508	0.00742293	0.00727011	0.0066745	0.00662724	0.00690404	0.00726911	0.00822017	0.00778458	0.00731305	0.00663624	0.00662486	0.00766443	0.00804114	0.00848815	0.00739644	0.00734023	0.00850212	0.00784457	0.00802858	0.00794328	0.00665164	0.0091733
Ka.BP.St.139	0.378797	0.406233	0.197503	0.335203	0.337641	0.133156	0.340276	0.33197	0.389207	0.390529	0.298429	0.379466	0.239701	0.352143	0.367057	NA	0.00766622	0.00689707	0.00644169	0.00813747	0.007804	0.00657419	0.00701129	0.00708484	0.0064811	0.00754298	0.00689939	0.00763757	0.00782433	0.00698459	0.00834718	0.00707302	0.00729082	0.00815388	0.00831911	0.00621804	0.00778826	0.00769086	0.00763346
Ka.BP.St.159	0.37031	0.401603	0.218381	0.321074	0.342231	0.176126	0.349368	0.326959	0.404427	0.387189	0.353997	0.391754	0.287124	0.367412	0.359246	0.382819	NA	0.00742598	0.00746375	0.00716768	0.00782093	0.00799237	0.00551632	0.00806561	0.00670043	0.00834322	0.00633282	0.00758627	0.00757295	0.00815706	0.00968386	0.00861693	0.00726496	0.00851501	0.00806494	0.00759076	0.0089439	0.00771906	0.0077574
Ka.BP.St.177	0.409955	0.432395	0.242635	0.408381	0.421689	0.168295	0.430419	0.374498	0.431229	0.415701	0.33546	0.424409	0.255984	0.402117	0.394128	0.369527	0.380676	NA	0.00777201	0.00678738	0.00729979	0.00720129	0.00833741	0.00832617	0.00795646	0.00803066	0.00686445	0.0080542	0.00803687	0.00796052	0.00786762	0.00878489	0.00819776	0.00829275	0.00810603	0.00787237	0.00885736	0.00795243	0.00745554
Ka.BP.St.188	0.376737	0.397179	0.202764	0.342656	0.341285	0.147737	0.352305	0.332981	0.391405	0.376947	0.301497	0.374213	0.24619	0.353771	0.364331	0.383985	0.380387	0.382396	NA	0.00691637	0.00871243	0.0066836	0.00779609	0.00795296	0.00721902	0.00753514	0.0057023	0.00711503	0.00734884	0.00817431	0.00819379	0.00735996	0.00671152	0.00827334	0.00786038	0.0076613	0.00771499	0.00697875	0.00801318
Ka.BW.St.139	0.376587	0.402477	0.193736	0.329578	0.333138	0.128563	0.335708	0.320545	0.386239	0.38234	0.284127	0.368774	0.231929	0.339663	0.35383	0.446852	0.386197	0.361716	0.387896	NA	0.00808571	0.00809552	0.00729822	0.00702625	0.0065279	0.00659931	0.00654845	0.00724715	0.00725306	0.00705338	0.00665215	0.00687587	0.00709574	0.00769307	0.00656277	0.0074367	0.00862243	0.00734572	0.00768608
Ka.BW.St.159	0.370157	0.390302	0.195475	0.30854	0.333147	0.146808	0.327946	0.308582	0.393473	0.380282	0.302246	0.372182	0.263686	0.344272	0.350878	0.429451	0.418222	0.355543	0.381132	0.4355	NA	0.00676045	0.00735247	0.00754781	0.00665674	0.00829698	0.0064141	0.00736072	0.00764159	0.00686433	0.00950305	0.00693255	0.00833004	0.00765224	0.00832286	0.00711109	0.00852799	0.00754447	0.00910183
Ka.BW.St.177	0.372623	0.390959	0.191328	0.326328	0.328501	0.135854	0.349315	0.334003	0.389377	0.38765	0.298003	0.36608	0.23946	0.349689	0.372142	0.423545	0.388119	0.377406	0.386781	0.430913	0.41427	NA	0.00681011	0.00651592	0.00630234	0.00692417	0.00607469	0.00752981	0.00711893	0.00836149	0.00769064	0.00714833	0.00690689	0.00873986	0.00776255	0.00720662	0.00756635	0.0068111	0.00866394
Ka.BW.St.226	0.364213	0.382191	0.188039	0.313477	0.319603	0.132367	0.337856	0.312791	0.375791	0.368739	0.289347	0.360308	0.231901	0.33304	0.356197	0.421875	0.377172	0.367989	0.391932	0.42578	0.410632	0.424425	NA	0.00667215	0.00658299	0.00784958	0.00559819	0.00634803	0.0071131	0.0086223	0.00798953	0.00731601	0.00660528	0.0079131	0.00753174	0.00858887	0.00772115	0.00685932	0.00663837
Au.REF.St.74	0.400965	0.414705	0.240105	0.392656	0.415762	0.156687	0.38725	0.343447	0.408825	0.391001	0.302938	0.396736	0.242428	0.365256	0.354655	0.360273	0.368395	0.412602	0.366149	0.370105	0.357638	0.353614	0.347973	NA	0.00862968	0.00876339	0.00717017	0.00783538	0.00821168	0.0073225	0.00912819	0.00869134	0.00821871	0.0100114	0.00744611	0.00750218	0.00803479	0.00847426	0.00847421
Au.REF.St.74.1	0.391588	0.398424	0.278758	0.433815	0.47179	0.157105	0.425009	0.344472	0.405305	0.386654	0.292026	0.403099	0.231383	0.376532	0.350916	0.336191	0.349735	0.410252	0.343882	0.344859	0.331049	0.331573	0.321558	0.478864	NA	0.00783776	0.00766821	0.00840934	0.00827136	0.00819857	0.00824945	0.00753708	0.0078541	0.00757604	0.00831643	0.00829537	0.0088321	0.00808084	0.00918158
Au.REF.St.52	0.368179	0.373295	0.237363	0.342468	0.361034	0.184417	0.348067	0.323557	0.374739	0.353111	0.322296	0.36213	0.266973	0.345619	0.330295	0.328478	0.358882	0.378564	0.335721	0.326895	0.327899	0.325742	0.325014	0.40022	0.396692	NA	0.00792272	0.00848801	0.00839642	0.00977813	0.0101548	0.00913245	0.00914799	0.00807032	0.00970412	0.00872961	0.010523	0.00906006	0.0098757
Au.AP.2000.St.57	0.322909	0.324592	0.323917	0.39681	0.43121	0.151785	0.374037	0.298574	0.334592	0.320568	0.25716	0.339733	0.210667	0.31672	0.293402	0.27516	0.285515	0.347196	0.283101	0.27751	0.269568	0.272681	0.264068	0.37412	0.425191	0.347658	NA	0.00879654	0.00837046	0.00766662	0.00749376	0.0071043	0.0073084	0.00799749	0.00855127	0.00737497	0.00837155	0.00645468	0.00849758
Au.AP.St.55	0.382849	0.387625	0.266129	0.394094	0.425337	0.162813	0.390998	0.327736	0.386063	0.368203	0.288201	0.378343	0.235236	0.354931	0.336072	0.326771	0.338719	0.389088	0.330842	0.326144	0.329159	0.319462	0.314277	0.418857	0.443718	0.409633	0.434707	NA	0.00819512	0.00929248	0.0087648	0.00811963	0.00812623	0.00872519	0.00855297	0.00807884	0.00746885	0.00923263	0.00869736
Au.AP.St.66	0.379179	0.382738	0.273815	0.398756	0.435841	0.161582	0.402695	0.326455	0.38862	0.369721	0.293987	0.376568	0.230192	0.362117	0.338732	0.32634	0.342677	0.395749	0.330621	0.329127	0.324501	0.324265	0.317755	0.420212	0.450443	0.403297	0.440039	0.462059	NA	0.00880804	0.00829244	0.00921335	0.00816844	0.00811231	0.0103977	0.00863268	0.00938508	0.00798832	0.00931593
Au.AP.St.69	0.399103	0.406887	0.245169	0.378628	0.401858	0.168042	0.390653	0.342222	0.399217	0.379275	0.309217	0.38839	0.250356	0.363153	0.350295	0.349096	0.364263	0.411187	0.35228	0.350322	0.344197	0.344542	0.33882	0.432792	0.439723	0.434367	0.389639	0.448456	0.44784	NA	0.0090551	0.0090669	0.00860498	0.0101483	0.00980475	0.00955466	0.00892675	0.00784632	0.0100051
Au.P.St.23	0.336839	0.347374	0.215021	0.296057	0.31569	0.196964	0.310833	0.298835	0.342533	0.317658	0.31032	0.330742	0.275214	0.313469	0.304727	0.302601	0.345299	0.341287	0.306254	0.300565	0.314219	0.302793	0.302089	0.350801	0.33617	0.390504	0.294719	0.353064	0.352776	0.387005	NA	0.0107285	0.010218	0.0106177	0.0109997	0.00945301	0.0103556	0.00952704	0.00863857
Au.P.St.55	0.28149	0.291583	0.206408	0.244684	0.257466	0.200005	0.256978	0.254828	0.280478	0.261214	0.292355	0.275743	0.269751	0.266987	0.25933	0.254068	0.293976	0.285947	0.266483	0.250228	0.27333	0.257417	0.257242	0.297534	0.281484	0.336929	0.251986	0.299346	0.290197	0.322486	0.342576	NA	0.010574	0.0108954	0.00972078	0.00830437	0.00943177	0.00928152	0.00944626
Au.P.St.57	0.388203	0.403765	0.224616	0.335531	0.355622	0.189146	0.356788	0.330862	0.389488	0.367975	0.334948	0.373321	0.286718	0.35748	0.347473	0.351314	0.383109	0.389322	0.35479	0.357803	0.364472	0.34951	0.345277	0.408529	0.386274	0.432076	0.333841	0.404999	0.400296	0.442915	0.400066	0.349832	NA	0.0108096	0.0083048	0.00846402	0.0092987	0.00942572	0.00902039
Au.P.St.66	0.379241	0.386434	0.220398	0.325624	0.350104	0.17546	0.346387	0.320366	0.377012	0.354675	0.317724	0.360298	0.264048	0.340195	0.333739	0.335993	0.364664	0.379449	0.337714	0.341054	0.346802	0.337618	0.334605	0.393368	0.382215	0.416014	0.331267	0.396597	0.392143	0.429513	0.396645	0.345403	0.446694	NA	0.00982567	0.00926177	0.00961595	0.00954506	0.0114022
Au.P.St.69	0.406179	0.412651	0.225133	0.35554	0.379222	0.1632	0.371753	0.338289	0.401359	0.382534	0.308456	0.380212	0.255845	0.361433	0.353853	0.358552	0.380607	0.404095	0.357451	0.369095	0.366054	0.355783	0.352862	0.434649	0.415928	0.427322	0.359528	0.419647	0.421291	0.453906	0.396878	0.337744	0.447268	0.43711	NA	0.00936913	0.00961824	0.00932761	0.00871768
Au.BW.St.23	0.391841	0.407856	0.231454	0.352431	0.376073	0.168099	0.36835	0.327601	0.394178	0.372011	0.318585	0.374997	0.265444	0.353193	0.346772	0.349603	0.373006	0.392883	0.351175	0.357381	0.357831	0.352299	0.345307	0.43003	0.416881	0.414579	0.348136	0.404316	0.407104	0.436137	0.386966	0.335017	0.440245	0.427479	0.4499	NA	0.00951247	0.00878097	0.00953079
Au.BW.St.55	0.381386	0.396944	0.225722	0.333594	0.356871	0.179	0.352153	0.324712	0.3873	0.363193	0.320358	0.37124	0.269187	0.348891	0.33906	0.344456	0.375502	0.390612	0.343945	0.348484	0.354327	0.342475	0.341052	0.403549	0.387535	0.422369	0.342614	0.405505	0.401513	0.437152	0.402005	0.342341	0.452386	0.447344	0.450953	0.43442	NA	0.00908531	0.00965641
Au.BP.St.57	0.395714	0.40771	0.226164	0.350798	0.371519	0.176713	0.359464	0.333447	0.391942	0.370423	0.31055	0.375711	0.269507	0.354036	0.344693	0.3477	0.369766	0.391145	0.353863	0.358686	0.35791	0.346996	0.345569	0.428163	0.411038	0.423917	0.349759	0.411296	0.400771	0.433533	0.393555	0.33798	0.442378	0.429041	0.44795	0.441541	0.437281	NA	0.00854398
Au.BW.St.66	0.402844	0.406922	0.227884	0.35364	0.373339	0.169875	0.370076	0.328105	0.389868	0.371779	0.313504	0.377085	0.262547	0.356989	0.347638	0.35379	0.370483	0.394365	0.3551	0.355829	0.361573	0.349596	0.343705	0.422845	0.416563	0.42332	0.355481	0.421144	0.412687	0.446756	0.384933	0.337047	0.439823	0.428792	0.446325	0.44031	0.433868	0.443278	NA
											5

## Sheet: Suppl.Table6
Supplementary Table 6: Differential abundance analysis with edgeR of OTU (16S rRNA gene); cutoff: FDR < 0.01
OTU	Domain	Phylum	Class	Order	Family	Genus	logFC (PO.P / AU.P)	logCPM	P-Value	FDR
otu50	Bacteria	Proteobacteria	Gammaproteobacteria	Alteromonadales	Pseudoalteromonadaceae	Pseudoalteromonas	-9.89608	11.76	9.21e-09	3.67e-06
otu116	Bacteria	Proteobacteria	Gammaproteobacteria	Methylococcales	Methylococcales_unclassified	Methylococcales_unclassified	-9.55215	10.8908	5.46e-44	1.38e-40
otu814	Bacteria	Proteobacteria	Gammaproteobacteria	Oceanospirillales	Saccharospirillaceae	Oleispira	-8.83372	9.17432	2.63e-05	0.00367655
otu27	Bacteria	Proteobacteria	Gammaproteobacteria	Methylococcales	Cycloclasticaceae	Cycloclasticus	-8.74423	12.6202	8.58e-47	3.24e-43
otu329	Bacteria	Proteobacteria	Alphaproteobacteria	Rhodobacterales	Rhodobacteraceae	Oceanibulbus	-8.343	9.80731	3.44e-05	0.00458826
otu256	Bacteria	Proteobacteria	Gammaproteobacteria	Betaproteobacteriales	Burkholderiaceae	Polaromonas	-8.10269	8.51604	1.95e-06	0.00039785
otu89	Bacteria	Proteobacteria	Alphaproteobacteria	Rhizobiales	Beijerinckiaceae	Methylobacterium	-7.90919	8.48728	4.18e-05	0.00539484
otu349	Bacteria	Proteobacteria	Gammaproteobacteria	Pseudomonadales	Moraxellaceae	Enhydrobacter	-7.7135	10.1789	4.1e-06	0.0007561
otu65	Bacteria	Proteobacteria	Gammaproteobacteria	Alteromonadales	Pseudoalteromonadaceae	Pseudoalteromonas	-7.62596	11.507	1.12e-07	3.68e-05
otu165	Bacteria	Proteobacteria	Gammaproteobacteria	Alteromonadales	Pseudoalteromonadaceae	Pseudoalteromonas	-7.56612	8.99834	6.02e-07	0.00015151
otu357	Bacteria	Proteobacteria	Gammaproteobacteria	Pseudomonadales	Pseudomonadaceae	Pseudomonas	-7.5427	8.14447	1.74e-06	0.00037659
otu1069	Bacteria	Proteobacteria	Gammaproteobacteria	Oceanospirillales	Halomonadaceae	Halomonas	-7.05388	7.77124	6e-06	0.00107972
otu38	Bacteria	Proteobacteria	Gammaproteobacteria	Gammaproteobacteria_unclassified	Gammaproteobacteria_unclassified	Gammaproteobacteria_unclassified	-7.01545	12.1293	2.42e-25	4.58e-22
otu678	Bacteria	Proteobacteria	Gammaproteobacteria	Pseudomonadales	Moraxellaceae	Acinetobacter	-6.65257	8.56394	8.32e-08	2.86e-05
otu971	Bacteria	Proteobacteria	Gammaproteobacteria	Thiotrichales	Thiotrichaceae	Thiotrichaceae_unclassified	-6.48047	7.31184	4.28e-12	3.23e-09
otu614	Bacteria	Proteobacteria	Deltaproteobacteria	Oligoflexales	053A03-B-DI-P58	053A03-B-DI-P58_unclassified	-6.41256	7.99464	1.84e-18	1.99e-15
otu1010	Bacteria	Proteobacteria	Gammaproteobacteria	Betaproteobacteriales	Burkholderiaceae	Polaromonas	-6.41046	7.13082	3.39e-05	0.00458826
otu1363	Bacteria	Actinobacteria	Actinobacteria	Micrococcales	Micrococcaceae	Rothia	-6.19914	7.13583	5.16e-05	0.00629455
otu199	Bacteria	Firmicutes	Bacilli	Lactobacillales	Streptococcaceae	Streptococcus	-6.16943	8.27165	4.65e-07	0.00012558
otu4	Bacteria	Proteobacteria	Gammaproteobacteria	Thiomicrospirales	Thioglobaceae	SUP05 cluster	-6.09411	15.5601	2.77e-78	2.1e-74
otu44	Bacteria	Proteobacteria	Gammaproteobacteria	Pseudomonadales	Moraxellaceae	Psychrobacter	-6.03434	12.6371	1.27e-07	4e-05
otu1148	Bacteria	Proteobacteria	Deltaproteobacteria	Bdellovibrionales	Bacteriovoracaceae	Bacteriovoracaceae_unclassified	-5.87586	6.92258	5.52e-09	2.32e-06
otu2039	Bacteria	Epsilonbacteraeota	Campylobacteria	Campylobacterales	Thiovulaceae	Sulfurimonas	-5.83721	6.83695	1.31e-05	0.00211036
otu339	Bacteria	Proteobacteria	Gammaproteobacteria	Pseudomonadales	Moraxellaceae	Acinetobacter	-5.53495	8.35015	2.97e-06	0.00059054
otu620	Bacteria	Proteobacteria	Gammaproteobacteria	Pseudomonadales	Moraxellaceae	Acinetobacter	-5.38224	7.24483	7.92e-06	0.00139188
otu1	Bacteria	Epsilonbacteraeota	Campylobacteria	Campylobacterales	Thiovulaceae	Sulfurimonas	-5.32851	17.2008	3.79e-17	3.59e-14
otu1891	Bacteria	Bacteria_unclassified	Bacteria_unclassified	Bacteria_unclassified	Bacteria_unclassified	Bacteria_unclassified	-5.17014	7.08323	3.46e-05	0.00458826
otu1977	Bacteria	Actinobacteria	Actinobacteria	Micrococcales	Micrococcaceae	Rothia	-5.01483	7.01997	1.8e-05	0.00271636
otu1281	Bacteria	Acidobacteria	Subgroup 5	Subgroup 5_unclassified	Subgroup 5_unclassified	Subgroup 5_unclassified	-5.0116	6.47794	2.6e-05	0.00367655
otu843	Bacteria	Dependentiae	Babeliae	Babeliales	Babeliaceae	Babeliaceae_unclassified	-4.59643	6.79625	6.37e-07	0.00015151
otu730	Bacteria	Proteobacteria	Deltaproteobacteria	Bdellovibrionales	Bdellovibrionaceae	OM27 clade	-3.52468	7.67122	1e-08	3.79e-06
otu456	Bacteria	Bacteroidetes	Bacteroidia	Sphingobacteriales	Lentimicrobiaceae	Lentimicrobiaceae_unclassified	-3.30438	7.8368	1.95e-09	8.65e-07
otu653	Bacteria	Patescibacteria	Parcubacteria	Candidatus Portnoybacteria	Candidatus Portnoybacteria_unclassified	Candidatus Portnoybacteria_unclassified	-3.2926	7.39659	3.89e-06	0.00073607
otu1358	Bacteria	Planctomycetes	BD7-11	BD7-11_unclassified	BD7-11_unclassified	BD7-11_unclassified	-3.14962	6.86908	3.46e-06	0.00067161
otu809	Bacteria	Proteobacteria	Deltaproteobacteria	PB19	PB19_unclassified	PB19_unclassified	-2.97557	7.0574	1.6e-05	0.00246836
otu1063	Bacteria	Chloroflexi	Anaerolineae	Caldilineales	Caldilineaceae	Caldilineaceae_unclassified	-2.87505	6.90467	5.75e-05	0.00679447
otu52	Bacteria	Planctomycetes	Pla3 lineage	Pla3 lineage_unclassified	Pla3 lineage_unclassified	Pla3 lineage_unclassified	-2.75034	11.8362	1.24e-11	7.23e-09
otu1034	Bacteria	Proteobacteria	Deltaproteobacteria	PB19	PB19_unclassified	PB19_unclassified	-2.70763	6.87632	8.54e-05	0.00964134
otu132	Bacteria	Bacteroidetes	Bacteroidia	Sphingobacteriales	Lentimicrobiaceae	Lentimicrobiaceae_unclassified	-2.53211	9.43065	7.02e-12	4.82e-09
otu387	Bacteria	Proteobacteria	Gammaproteobacteria	Ga0077536	Ga0077536_unclassified	Ga0077536_unclassified	-2.19817	7.9534	4.53e-05	0.0057095
otu367	Bacteria	Nitrospinae	P9X2b3D02	P9X2b3D02_unclassified	P9X2b3D02_unclassified	P9X2b3D02_unclassified	-2.00869	8.18992	4.21e-05	0.00539484
otu445	Bacteria	Bacteroidetes	Bacteroidia	Chitinophagales	Saprospiraceae	Aureispira	-1.97984	8.37319	5.4e-05	0.00647655
otu85	Bacteria	Planctomycetes	Phycisphaerae	Phycisphaerales	Phycisphaeraceae	JL-ETNP-F27	-1.74015	10.7937	6.32e-07	0.00015151
otu294	Bacteria	Planctomycetes	OM190	OM190_unclassified	OM190_unclassified	OM190_unclassified	-1.59308	8.91546	8.43e-06	0.00144813
otu166	Bacteria	Chloroflexi	Dehalococcoidia	SAR202 clade	SAR202 clade_unclassified	SAR202 clade_unclassified	1.87142	8.78483	8.04e-05	0.00935587
otu53	Bacteria	Proteobacteria	Alphaproteobacteria	Rhodobacterales	Rhodobacteraceae	Rhodobacteraceae_unclassified	1.92149	10.1867	2.82e-07	8.2e-05
otu202	Bacteria	Epsilonbacteraeota	Campylobacteria	Campylobacterales	Arcobacteraceae	Arcobacter	3.55279	8.0981	1.03e-05	0.00168794
otu81	Bacteria	Proteobacteria	Gammaproteobacteria	Methylococcales	Methylomonaceae	Marine Methylotrophic Group 2	3.68669	11.182	1.5e-07	4.54e-05
otu61	Bacteria	Bacteroidetes	Bacteroidia	Flavobacteriales	Cryomorphaceae	Cryomorphaceae_unclassified	3.87843	9.90634	1.16e-10	5.48e-08
otu117	Bacteria	Bacteroidetes	Bacteroidia	Flavobacteriales	Flavobacteriaceae	Flavobacteriaceae_unclassified	4.61243	9.4984	1.61e-11	8.67e-09
otu625	Bacteria	Proteobacteria	Alphaproteobacteria	Rhodobacterales	Rhodobacteraceae	Sulfitobacter	5.00362	6.81431	8.43e-05	0.00964134
otu3	Bacteria	Proteobacteria	Gammaproteobacteria	Thiomicrospirales	Thioglobaceae	SUP05 cluster	5.35905	17.0671	1.31e-13	1.1e-10
otu469	Bacteria	Proteobacteria	Gammaproteobacteria	Oceanospirillales	Nitrincolaceae	Profundimonas	5.46871	7.08966	1.93e-05	0.00285917
otu48	Bacteria	Bacteroidetes	Bacteroidia	Flavobacteriales	Flavobacteriaceae	Polaribacter 1	5.51492	11.1641	5.12e-20	6.46e-17
otu16	Bacteria	Proteobacteria	Gammaproteobacteria	Alteromonadales	Colwelliaceae	Colwellia	5.55899	10.2216	6.41e-07	0.00015151
otu19	Bacteria	Proteobacteria	Gammaproteobacteria	Alteromonadales	Colwelliaceae	Colwellia	5.71169	11.2842	8.94e-12	5.63e-09
otu121	Bacteria	Proteobacteria	Gammaproteobacteria	Oceanospirillales	Nitrincolaceae	Profundimonas	5.81062	8.45251	2.72e-11	1.37e-08
otu120	Bacteria	Proteobacteria	Gammaproteobacteria	Oceanospirillales	Halomonadaceae	Halomonas	6.01335	8.69433	4.61e-05	0.00571741
otu398	Bacteria	Verrucomicrobia	Verrucomicrobiae	Opitutales	Puniceicoccaceae	Lentimonas	6.37167	7.73764	1.26e-06	0.00028919
otu234	Bacteria	Proteobacteria	Alphaproteobacteria	Sphingomonadales	Sphingomonadaceae	Sphingomonadaceae_unclassified	6.92513	8.17481	1.33e-06	0.00029625
otu980	Bacteria	Proteobacteria	Gammaproteobacteria	Methylococcales	Methylomonaceae	Milano-WF1B-03	7.2508	8.4525	2.33e-05	0.00338693
otu194	Bacteria	Epsilonbacteraeota	Campylobacteria	Campylobacterales	Arcobacteraceae	Arcobacter	7.32979	8.5133	8.22e-08	2.86e-05
otu30	Bacteria	Proteobacteria	Gammaproteobacteria	Alteromonadales	Pseudoalteromonadaceae	Pseudoalteromonas	7.6969	11.8279	1.03e-05	0.00168794
otu33	Bacteria	Proteobacteria	Gammaproteobacteria	Oceanospirillales	Saccharospirillaceae	Oleispira	7.84106	10.5013	1.86e-06	0.00038996
otu24	Bacteria	Proteobacteria	Gammaproteobacteria	Alteromonadales	Colwelliaceae	Colwellia	8.02985	9.12818	3.61e-07	0.00010122
otu90	Bacteria	Proteobacteria	Gammaproteobacteria	Alteromonadales	Pseudoalteromonadaceae	Pseudoalteromonas	8.26672	9.36611	1.4e-05	0.0021989
otu13	Bacteria	Proteobacteria	Gammaproteobacteria	Oceanospirillales	Saccharospirillaceae	Oleispira	11.2823	13.6931	1.43e-22	2.16e-19

## Sheet: Suppl.Table7
Supplementary Table 7: Information about amplified 16S rRNA gene sequences obtained in this study
Area	Station	Depth	Water type	Sequences		ENA run accession
		(m)		n. a	n. b
AURORA	PS86-23	3290	Plume	68077	51348	ERR7132512
	PS86-23	3955	Bottom water	82198	56117	ERR7132511
	PS86-52	3200	Internal reference	51223	35734	ERR7132510
	PS86-55	2501	Above Plume	178088	45091	ERR7132509
	PS86-55	3400	Plume	56984	42619	ERR7132508
	PS86-55	3949	Bottom water	59383	42680	ERR7132507
	PS86-57	2000	Above Plume	62727	43427	ERR7132506
	PS86-57	3360	Plume	42552	30172	ERR7132505
	PS86-57	3500	Below Plume	49934	34988	ERR7132504
	PS86-66	2500	Above Plume	89974	63756	ERR7132503
	PS86-66	3575	Plume	82924	56295	ERR7132502
	PS86-66	3933	Bottom water	60696	40483	ERR7132501
	PS86-69	2900	Above Plume	105567	60704	ERR7132500
	PS86-69	3517	Plume	88607	64132	ERR7132499
	PS86-74	2500	External reference	65783	44215	ERR7132498
	PS86-74	2983	External reference	63900	42205	ERR7132497
POLARIS	PS101-55	3054	External reference	79741	25195	ERR7132496
	PS101-112	3042	Internal reference	76834	25191	ERR7132495
	PS101-139	2338	Above Plume	113827	44736	ERR7132494
	PS101-139	2574	Plume	94432	38565	ERR7132493
	PS101-139	3106.54	Below Plume	89859	33978	ERR7132492
	PS101-139	3282	Bottom water	119473	71054	ERR7132491
	PS101-159	2336	Above Plume	107497	61940	ERR7132490
	PS101-159	2604	Plume	109502	69377	ERR7132489
	PS101-159	2653	Plume	114535	66907	ERR7132488
	PS101-159	2827	Plume	60827	16534	ERR7132487
	PS101-159	2846	Plume	67182	24983	ERR7132486
	PS101-159	3006	Below Plume	90148	47216	ERR7132485
	PS101-159	3150	Bottom water	108566	66376	ERR7132484
	PS101-177	2640	Plume	58728	18134	ERR7132483
	PS101-177	2665.86	Plume	61023	48379	ERR7132482
	PS101-177	2870.49	Below Plume	83378	30588	ERR7132556
	PS101-177	3136	Bottom water	85678	31198	ERR7132555
	PS101-188	2492	Above Plume	87852	32671	ERR7132554
	PS101-188	2716	Plume	84816	32560	ERR7132553
	PS101-188	3056	Below Plume	132079	47739	ERR7132552
	PS101-226	3219	Bottom water	104932	38810	ERR7132551
a raw reads	b after quality-trimming and merging

## Sheet: Suppl.Table8
Supplementary Table 8: Summary on the transcriptomic datasets produced in this study
Area	Station	Depth	Water type	Total reads		rRNA reads	non-rRNA reads	Reconstructed Transcripts	RMBT	ENA run accession
		(m)		n. a	n. b	n.	n.	n.	%
AURORA	PS86-33	2690	Above Plume	63025911	46326818	43793362	2533456	136040	63	ERR7132538
	PS86-33	3182	Background	66684140	47890676	46426446	1464230	94871	67	ERR7132537
	PS86-40	3183	Plume	61081218	43636339	40975518	2660821	70806	79	ERR7132536
	PS86-43	3004	Plume	75816068	50503534	49043160	1460374	70656	79	ERR7132535
	PS86-55	2478	Above Plume	59302176	42661024	41382577	1278447	139171	62	ERR7132534
	PS86-55	2958	Plume	61414218	43181956	42236985	944971	55363	76	ERR7132533
POLARIS	PS101-55	2070	External reference	23971509	14640371	13606023	1034348	156264	62	ERR7132532
	PS101-55	3060	External reference	23477945	17722478	16441881	1280597	150030	66	ERR7132531
	PS101-55	3070	External reference	24281216	15227957	13849041	1378916	147341	64	ERR7132530
	PS101-55	3870	External reference	23916469	13898189	12853662	1044527	137336	58	ERR7132529
	PS101-112	2051	Internal reference	23012457	15580334	14438828	1141506	147162	63	ERR7132528
	PS101-112	3051	Internal reference	21663970	15448197	14215938	1232259	160344	63	ERR7132527
	PS101-112	4051	Internal reference	25391405	14888206	13535502	1352704	137114	66	ERR7132526
	PS101-181	2425	Above Plume	23230766	17629630	16140778	1488852	135435	66	ERR7132524
	PS101-181	2635	Plume	23872305	17480603	16028541	1452062	100288	69	ERR7132523
	PS101-181	2645	Plume	21912579	15033748	13751418	1282330	98440	72	ERR7132522
	PS101-181	2665	Plume	26730805	15909289	14149941	1759348	116280	71	ERR7132521
	PS101-188	2425	Above Plume	22560220	15212609	13633394	1579215	140429	63	ERR7132520
	PS101-188	2635	Plume	21974670	15494959	13847460	1647499	99976	71	ERR7132519
	PS101-188	2645	Plume	23429425	15943412	14270401	1673011	109585	69	ERR7132518
	PS101-188	2665	Plume	23360555	15732214	14233206	1499008	112896	70	ERR7132517
	PS101-230	3360	Bottom water at vents	24763800	14586156	12862794	1723362	115824	63	ERR7132516
	PS101-230	3379	Bottom water at vents	26749780	16975634	15377509	1598125	121543	60	ERR7132515
	PS101-230	3380	Bottom water at vents	22563499	17100687	15647569	1453118	112209	64	ERR7132514
	PS101-230	3390	Bottom water at vents	26653791	16232615	14180943	2051672	125139	61	ERR7132513
a raw reads; b after quality-trimming; RMBT: reads mapped back to transcripts

## Sheet: Suppl.Table9
Supplementary Table 9: Expression analysis with edgeR of transcripts (non-rRNA); cutoff: FDR < 0.01; counts are TPM
qseqid	logFC (PO.P / AU.P)	P-Value	FDR	taxon	Gene	Gene.short	PS101_055_Ref_2024m	PS101_055_Ref_3014m	PS101_055_Ref_3814m	PS101_055_Ref_3804m	PS101_112_Ref.in_2051m	PS101_112_Ref.in_3051m	PS101_112_Ref.in_4051m	PS101_181_AP_2425m	PS101_188_AP_2425m	PS101_181_P_2635m	PS101_181_P_2645m	PS101_181_P_2665m	PS101_188_P_2635m	PS101_188_P_2645m	PS101_188_P_2665m	PS101_230_BW_vents_3360m	PS101_230_BW_vents_3379m	PS101_230_BW_vents_3380m	PS101_230_BW_vents_3390m	PS86_033_AP_2690m	PS86_055_AP_2478m	PS86_033_BG_3181m	PS86_040_P_3183m	PS86_043_P_3004m	PS86_055_P_2958m
15_NODE_1615_length_515_cov_11.450673_g1537_i0_2	6.38904	2.77732e-15	8.7225e-13	Candidatus Thioglobus	Cytochrome cbb3 oxidase	FixN/CcoN/COX1	0	0	0	0	0	0	0	204.704	31.9005	140.969	444.626	393.547	198.302	166.722	203.033	0	0	0	0	0	0	0	0	2.62692	3.98975
15_NODE_43_length_2897_cov_43.959689_g27_i0_5	8.76741	1.60522e-40	4.39466e-36	Candidatus Thioglobus	Cytochrome cbb3 oxidase	FixN/CcoN/COX1	0	3.35565	0	3.40581	1.94066	4.97676	0	1042.39	284.179	949.503	1953.79	1927.79	2092.29	1161.76	1549.41	2.48005	0	0	2.38391	0	0	0	1.4994	2.58103	3.92006
22_NODE_2802_length_392_cov_2.656347_g2701_i0_1	3.94182	6.22558e-10	5.93349e-08	Candidatus Thioglobus	Cytochrome aa3 oxidase	CoxA	0	0	0	0	0	0	0	60.621	7.27768	60.3006	97.4852	113.307	53.9795	61.9328	59.0235	0	0	0	0	0	0	0	2.61113	5.6184	1.70664
15_NODE_13_length_4675_cov_54.065784_g8_i0_4	6.56329	1.6e-27	4.73e-24	uncultured SUP05 cluster bacterium	Adenylylsulfate_reductase_subunit_A	aprA	0	0	0	0	0	0	0	828.225	180.217	861.788	2032.09	1789.93	1055.2	1062.49	1153.44	0	0	0	0	0	0	0	14.4926	10.5546	5.82919
18_NODE_24_length_3719_cov_37.367945_g17_i0_2	5.08795	2.46e-23	3.66e-20	uncultured SUP05 cluster bacterium	Adenylylsulfate_reductase_subunit_A	aprA	0	0	0	0	1.97516	0	0	803.071	163.756	825.413	1796.38	1727.45	1050.1	1026.66	1099.93	0	0	0	0	0.990386	0.971453	1.62253	36.6254	26.2692	19.9488
18_NODE_30_length_3339_cov_36.587462_g17_i1_4	5.35202	7.64e-19	5.02e-16	Candidatus Thioglobus	Adenylylsulfate_reductase_subunit_A	aprA	0	0	0	0	0	0	0	493.74	98.6113	445.543	1126.02	993.808	620.074	576.961	665.279	0	0	0	0	0	0.738436	1.23334	26.6802	27.9553	12.131
15_NODE_34_length_3493_cov_45.349883_g8_i1_1	4.74199	4.32e-17	1.96e-14	Candidatus Thioglobus	Adenylylsulfate_reductase_subunit_A	aprA	0	0	0	0	0	0	0	274.067	56.3552	229.673	580.224	544.219	263.825	311.794	312.458	0	0	0	0	0	0	0	9.55828	12.6564	8.65016
18_NODE_76_length_2266_cov_29.284934_g17_i8_2	4.60141	1.09e-16	4.54e-14	uncultured SUP05 cluster bacterium	Adenylylsulfate_reductase_subunit_A	aprA	0	0	0	0	0	0	0.390192	210.203	30.7736	203.001	442.155	404.118	266.37	242.769	290.055	0	0	0	0	0.201845	0	0	10.5746	3.74764	2.84595
3_NODE_7_length_7251_cov_28.409914_g4_i0_7	-2.43511	4.7e-09	3.72e-07	Candidatus Thioglobus	Adenylylsulfate_reductase_subunit_A	aprA	0	0	0	0	0	0	0	71.613	22.3982	42.6224	177.556	193.835	62.5686	79.8138	92.4785	0	0	0	0	0	0	0	10.2278	0	1.90999
3_NODE_3152_length_400_cov_2.117825_g2952_i0_1	4.12156	1.25e-08	8.95e-07	uncultured SUP05 cluster bacterium	Adenylylsulfate_reductase_subunit_A	aprA	0	0	0	0	0	0	0	46.7627	7.43024	27.2181	98.3578	92.5461	37.7904	56.7163	52.3408	0	0	0	0	0	0	0	4.26538	2.75337	0
3_NODE_2050_length_536_cov_1.974304_g1850_i0_1	4.30228	5.59e-07	2.75e-05	uncultured_SUP05_cluster_bacterium	Adenylylsulfate_reductase_subunit_A	aprA	0	0	0	0	0	0	0	33.9296	6.75313	26.9254	89.1918	71.2381	56.2221	42.7907	56.3341	0	0	0	0	11.681	6.61019	13.2485	328.825	222.838	145.694
16_NODE_38_length_3720_cov_84.471925_g20_i0_5	4.97992	2.27e-17	1.08e-14	Candidatus Thioglobus	Adenylylsulfate_reductase_subunit_B	aprB	1.24768	0	0	0	0	0	0	370.318	48.9939	316.213	804.691	767.154	422.229	449.786	528.287	0	0	0	0	1.52107	0	0	22.2659	9.07765	7.65951
16_NODE_45_length_3533_cov_45.761836_g20_i1_5	4.11047	8.03e-14	1.8e-11	Candidatus Thioglobus	Adenylylsulfate_reductase_subunit_B	aprB	0	0	1.25642	0	1.22427	0	1.1867	148.843	21.0912	134.516	337.915	289.672	198.339	175.406	182.051	0	1.53525	0	1.5039	0	1.20428	0	14.1886	8.95539	4.94598
17_NODE_123_length_2504_cov_66.386858_g29_i4_1	3.48336	1.06e-11	1.48e-09	Candidatus Thioglobus	Adenylylsulfate_reductase_subunit_B	aprB	1.30096	0	1.62306	0	0	0	0	171.789	39.1661	141.095	377.485	354.508	187.652	205.514	243.068	0	1.98325	0	0	0	0	0	15.8851	16.8272	3.19464
17_NODE_54_length_3757_cov_87.649132_g29_i0_1	3.90434	2.48e-10	2.6e-08	Candidatus Thioglobus	Adenylylsulfate_reductase_subunit_B	aprB	0	0	0	0.948822	0	0.924312	0	110.987	17.4638	108.652	250.747	242.376	134.466	136.907	156.473	0	0	1.46126	0	1.08436	0.531817	0	16.7087	10.0666	7.6446
1_NODE_6_length_4085_cov_12.369024_g4_i0_1	-3.43141	1.10971e-16	4.62067e-14	Candidatus Thioglobus	Dissimilatory sulfite reductase	DsrA	0	2.89979	0	2.94314	1.67703	0	0	135.368	23.4739	181.111	390.792	287.556	185.589	149.007	185.776	4.28628	8.41199	6.79901	4.12012	310.29	164.964	662.634	2658.8	1172.08	1996.95
15_NODE_20_length_4298_cov_44.108536_g13_i0_2	3.91418	8.38507e-11	9.65045e-09	Candidatus Thioglobus	Dissimilatory sulfite reductase	DsrA	0	0	1.97437	0	0	0	0	433.284	60.0723	328.816	955.381	705.834	485.072	339.741	370.559	0	0	2.59991	0	0	0	3.16077	23.7827	35.8216	17.4876
15_NODE_24_length_3985_cov_61.356742_g13_i3_1	2.38383	1.27337e-08	9.08736e-07	Candidatus Thioglobus	Dissimilatory sulfite reductase	DsrA	0	3.41531	0	3.46636	0	3.37682	0	726.307	121.222	769.768	1505.92	1379.31	903.625	756.831	885.067	0	0	0	4.85259	13.8654	11.6574	45.4308	199.914	105.077	155.6
16_NODE_30_length_3986_cov_99.112586_g3_i5_1	3.96866	5.71464e-15	1.65338e-12	Candidatus Thioglobus	Dissimilatory sulfite reductase	DsrA	0	0	0	0	0	3.24694	0	448.548	89.9757	372.756	1005.44	891.448	641.36	461.945	551.556	0	4.7632	2.56658	0	7.61835	5.60454	23.4018	41.0862	26.5217	26.8541
16_NODE_6_length_7477_cov_60.338823_g3_i0_9	2.68343	1.97228e-09	1.6867e-07	Candidatus Thioglobus	Dissimilatory sulfite reductase	DsrA	0	1.26389	0	6.41391	1.46188	1.24965	0	464.722	111.757	554.628	1074.89	967.655	683.812	553.66	587.955	0	1.83321	1.97559	3.59155	13.9273	7.19003	31.223	114.078	50.5508	104.829
17_NODE_40_length_4424_cov_75.273249_g6_i2_6	2.62072	1.0614e-09	9.55294e-08	Candidatus Thioglobus	Dissimilatory sulfite reductase	DsrA	0	3.26998	0	4.97829	1.89111	0	0	693.516	144.57	756.547	1542.38	1394.89	945.002	743.529	939.883	0	2.37147	2.55566	2.32305	20.8613	10.2313	45.051	176.795	89.2872	131.789
19_NODE_24_length_3985_cov_34.811798_g17_i1_6	4.20763	2.41397e-12	3.89612e-10	Candidatus Thioglobus	Dissimilatory sulfite reductase	DsrA	0	0	0	0	0	0	0	269.659	51.0408	250.406	799.88	541.127	410.124	241.308	368.614	0	0	0	0	0.990386	0	1.62253	18.3127	19.7019	13.9641
20_NODE_19_length_4616_cov_28.279525_g14_i1_1	3.16143	2.67365e-09	2.22738e-07	Candidatus Thioglobus	Dissimilatory sulfite reductase	DsrA	0	0	0	0	1.17881	2.01534	0	180.907	44.4237	151.661	470.714	327.471	240.734	174.13	212.936	0	1.47824	0	0	3.54647	1.15956	5.81011	29.1449	20.3812	16.6681
21_NODE_33_length_4044_cov_34.282767_g21_i1_1	3.86283	1.6205e-11	2.18546e-09	Candidatus Thioglobus	Dissimilatory sulfite reductase	DsrA	0	0	0	0	1.08924	0	0	196.469	29.3203	171.847	517.503	386.062	231.142	183.885	241.327	0	0	0	0	2.73084	0.535728	0.894776	12.6236	18.1083	13.2014
22_NODE_730_length_718_cov_4.280431_g635_i0_1	3.63255	4.20982e-10	4.19675e-08	Candidatus Thioglobus	Dissimilatory sulfite reductase	DsrA	0	0	0	0	0	1.58288	0	90.4193	5.98134	90.4245	180.14	188.023	101.404	96.6605	83.1599	0	0	0	0	0.928486	0	0	5.72272	7.3882	9.35099
3_NODE_532_length_1360_cov_3.628195_g420_i0_1	-4.07552	1.43595e-10	1.5812e-08	Candidatus Thioglobus	Periplasmic nitrate reductase	napA	0	0	2.00035	0	3.89835	0	0	3.88483	2.09872	1.83046	13.2294	1.86716	8.89511	2.16485	1.94526	0	0	2.63412	0	8.79619	0.958671	4.80353	90.3587	32.4044	78.7452
15_NODE_48_length_2733_cov_4.353228_g31_i0_2	4.98318	1.76509e-15	5.83087e-13	Candidatus Thioglobus	Assimilatory nitrate reductase	narB	0	0	0	0	0	1.71897	0	78.1536	25.9823	107.641	209.276	196.483	201.891	93.8036	166.571	0	0	0	0	0	0	0	6.21471	2.67446	2.03098
16_NODE_134_length_1902_cov_5.853246_g42_i1_1	4.37752	1.43149e-13	3.01175e-11	Candidatus Thioglobus	Assimilatory nitrate reductase	narB	0	0	0	0	0	0	0	42.109	18.8265	42.4186	89.0057	94.9129	101.404	58.2593	88.7039	0	0	0	0	0	0	0	2.25156	1.93789	4.41489
17_NODE_20_length_6734_cov_8.315829_g4_i1_4	4.70828	1.12444e-14	3.04793e-12	Candidatus Thioglobus	Assimilatory nitrate reductase	narB	0	0	0	0	0	0	1.86481	78.6047	24.8575	68.654	145.81	184.291	215.1	126.067	149.76	0	0	2.59991	0	0	0	0	5.94568	2.55868	3.88612
18_NODE_97_length_2047_cov_4.052073_g70_i0_1	6.61571	4.81759e-16	1.79445e-13	Candidatus Thioglobus	Assimilatory nitrate reductase	narB	0	0	0	0	0	0	0	53.5857	18.7316	46.0415	82.2954	84.8394	99.2391	47.4264	86.8098	0	0	0	0	0	0	0	1.22193	0	0
15_NODE_40_length_3085_cov_13.899867_g24_i0_1	8.77217	1.58781e-34	1.58072e-30	Bathymodiolus thermophilus thioautotrophic gill symbiont	NiFe hydrogenase group 1d	[NiFe]hyd-1d	0	0	0	0	0	0	0	869.98	158.367	640.125	1459.85	1681.64	1699.69	934.475	1362.13	0	0	0	0	0	0	0	3.6658	2.1034	0
1_NODE_1_length_4990_cov_22.218452_g0_i0_7	-6.86005	2.16899e-39	4.31863e-35	Candidatus Thioglobus	NiFe hydrogenase group 1l	[NiFe]hyd-1l	0	2.87807	0.854081	2.19082	0	0.711409	0.806688	4.97607	0	3.90771	3.76568	7.17492	3.79791	0.924317	4.98336	3.19063	3.13087	7.87277	4.08926	106.411	49.5277	216.033	539.478	244.06	373.199
16_NODE_56_length_3271_cov_8.703935_g19_i1_4	3.68044	1.34598e-07	7.69897e-06	Candidatus Thioglobus	NiFe hydrogenase group 1l	[NiFe]hyd-1l	0	0	0	0	1.60437	0	0	22.3833	8.63731	22.5998	68.9649	73.7696	45.7601	32.0741	33.6242	0	2.01189	0	0	1.60893	0	0	2.47915	2.13378	3.24078
17_NODE_34_length_4831_cov_10.139227_g13_i0_7	3.66521	1.10628e-05	0.000394746	Candidatus Thioglobus	NiFe hydrogenase group 1l	[NiFe]hyd-1l	0	0	0	0	0	0	0	33.05	1.78547	18.687	88.1632	77.8354	49.1886	38.6765	16.5492	0	0	0	0	0	0	0	1.28121	2.20543	5.02441
17_NODE_125_length_2478_cov_5.240764_g80_i0_1	3.85117	3.08383e-06	0.000125665	Candidatus Thioglobus	Nitrite reductase (NADH) large subunit	nirB	0	0	0	0	0	0	0	74.7703	8.28584	25.2936	78.3456	123.475	54.8725	38.4612	46.0799	0	0	0	0	0	0	0	1.48642	6.39671	0
17_NODE_19_length_6734_cov_8.658065_g4_i0_4	5.70465	1.04102e-17	5.36474e-15	Candidatus Thioglobus	Nitrite reductase (NADH) large subunit	nirB	0	0	0	0	0	0	0	28.6563	5.6295	20.5603	42.5092	72.9345	49.2109	34.8413	49.2437	0	0	0	0	0	0	0	0.757418	0.2173	0.990105
18_NODE_465_length_1014_cov_2.842328_g397_i0_2	5.03711	3.72222e-10	3.74515e-08	Candidatus Thioglobus	Nitrite reductase (NADH) large subunit	nirB	0	0	0	0	0	0	0	35.8204	7.03687	35.2901	70.2326	53.214	29.8248	32.6637	40.7646	0	0	0	2.00704	0	0	0	1.26236	1.0865	0
19_NODE_263_length_1287_cov_2.713465_g230_i0_1	4.26876	1.43574e-07	8.15636e-06	Candidatus Thioglobus	Nitrite reductase (NADH) large subunit	nirB	0	0	0	0	0	0	0	47.0767	5.65166	14.7878	61.3553	85.4776	59.8844	52.4678	38.4151	0	0	0	0	0	0	0	4.05547	0	1.76712
15_NODE_885_length_698_cov_6.850556_g813_i0_2	2.29367	1.12398e-07	6.55237e-06	Candidatus Thioglobus	Nitrite reductase (NADH) small subunit	nirD	0	0	0	0	0	0	0	71.8168	18.4752	62.8433	83.4628	95.3332	101.796	60.9835	75.3469	0	0	0	0	0.860374	0	0	11.9315	11.4103	13.864
22_NODE_1255_length_551_cov_8.051867_g1154_i0_1	3.9672	2.52003e-11	3.24666e-09	Candidatus Ruthia endofausta	Nitrite reductase (NO-forming)	nirS	0	0	1.29568	0	0	0	0	101.91	16.3127	116.192	209.942	180.202	142.6	103.765	103.32	0	0	1.70619	0	0	0	0	5.85278	10.9144	2.55027
15_NODE_16_length_4481_cov_30.800997_g11_i0_4	4.06867	2.10338e-17	1.00805e-14	Candidatus Thioglobus	Rubisco	RbcL	0	0	0	0	0	0	1.70265	966.262	158.872	828.089	1631.35	1798.76	1288.6	1057.4	1253.42	0	0	2.37383	0	10.5693	3.45576	28.8592	84.1443	29.2024	69.1899
15_NODE_88_length_1998_cov_32.555728_g65_i0_2	4.66873	7.64209e-20	5.99912e-17	Candidatus Thioglobus	Rubisco	RbcL	0.58679	0	0	0	0.713342	2.43912	0	459.931	105.994	381.839	930.391	862.357	530.623	505.47	607.258	0.911609	0	0.964012	0	2.50378	0	0.585985	12.6763	21.8207	21.6138
1_NODE_15305_length_276_cov_1.400966_g15088_i0_1	3.63945	1.40269e-06	6.24546e-05	Candidatus Thioglobus	Rubisco	RbcL	0	0	0	0	0	0	0	30.393	3.1275	12.2748	70.6433	80.6905	34.7956	37.0996	49.2799	0	0	0	0	0.728225	0	0	2.2442	2.89733	2.93364
22_NODE_18_length_2259_cov_9.698174_g15_i0_3	3.89928	1.5676e-20	1.4071e-17	Thiomicrorhabdus Am19	Rubisco	RbcL	0	0.997979	1.18462	2.0258	1.15432	0	0	606.214	119.316	508.401	975.403	1194.21	795.431	707.686	853.631	0	1.44752	1.55995	0	5.20917	2.27093	11.3788	57.9704	32.2394	38.4726
4_NODE_1656_length_640_cov_2.232925_g1381_i0_1	4.42328	6.95518e-13	1.25272e-10	uncultured SUP05 cluster bacterium	Rubisco	RbcL	0	0	0	0	0	1.26631	0	140.242	33.4955	108.509	291.576	282.389	141.966	157.947	175.929	1.89311	0	2.00193	1.81972	0.742789	0	0	3.43363	9.85093	5.98463
5_NODE_2725_length_383_cov_1.640127_g2529_i0_1	4.3477	3.22896e-12	5.08777e-10	uncultured SUP05 cluster bacterium	Rubisco	RbcL	0	0	0	0	0	0	0	58.0592	7.29432	49.6232	144.072	119.407	66.4693	79.7562	91.9491	0	0	0	0	1.35876	0	1.11301	2.09368	2.703	5.47375
1_NODE_69_length_2429_cov_10.253814_g46_i0_2	-6.22276	6.0767e-39	1.10909e-34	Candidatus Thioglobus	L-cysteine S-thiosulfotransferase	SoxA	0	1.70765	0	0	0	0	0	15.7465	4.2534	7.41945	20.1087	41.6252	45.0686	21.9371	35.4815	0	0	0	2.42629	147.567	61.2015	95.7291	1651.19	1304.26	1923.06
15_NODE_43_length_2897_cov_43.959689_g27_i0_2	4.82252	1.31764e-19	9.81587e-17	Candidatus Thioglobus	L-cysteine S-thiosulfotransferase	SoxA	0	0	0	1.83083	0	0	0	1016.73	231.391	585.849	1937.7	1940.69	1523.44	1360.26	1684.54	0	0	0	0	0	3.07855	0	32.2407	31.9115	56.8961
15_NODE_57_length_2438_cov_12.444913_g40_i0_4	3.39503	3.39836e-12	5.3013e-10	Candidatus Thioglobus	L-cysteine S-thiosulfotransferase	SoxA	0	0	0	0	0	0	0	188.086	67.7405	105.593	355.839	307.744	317.652	257.2	332.639	1.71064	1.6786	1.80897	0	1.34239	0	0	19.6503	21.3635	17.5754
17_NODE_12034_length_234_cov_2.078788_g11848_i0_1	2.85809	1.3961e-10	1.53886e-08	Candidatus Thioglobus	L-cysteine S-thiosulfotransferase	SoxA	0	1.64902	0	0	0	0	0	87.4336	24.6441	105.679	189.868	175.401	195.845	110.156	156.088	0	0	0	0	0	1.8762	0	22.1049	11.4152	15.4111
21_NODE_1380_length_689_cov_3.596774_g1276_i0_1	7.76991	7.91582e-13	1.41412e-10	Candidatus Thioglobus	L-cysteine S-thiosulfotransferase	SoxA	0	0	0	0	0	0	0	31.2155	4.21592	31.2548	90.7992	54.3861	44.6715	54.3596	60.5687	0	0	0	0	0	0	0	0	0	0
20_NODE_218_length_1587_cov_5.272069_g184_i0_1	7.28437	6.32117e-21	6.12588e-18	uncultured SUP05 cluster bacterium	L-cysteine S-thiosulfotransferase	SoxA	0	0	0	0	0	0	0	35.6005	9.23165	71.1229	151.947	98.5571	94.5571	119.032	102.68	0	0	0	0	0	0	0	0	0.950251	0
17_NODE_699_length_996_cov_2.402373_g585_i0_1	5.98929	1.18016e-12	2.03685e-10	Bathymodiolus septemdierum thioautotrophic gill symbiont	Thiosulfohydrolase	SoxB	0	0	0	0	0	0	0	20.908	4.10736	34.0323	81.9883	51.1585	73.986	57.1966	49.4914	0	0	0	0	0	0	0	1.47366	0	0
17_NODE_205_length_1891_cov_5.287047_g144_i0_1	2.87962	8.20863e-10	7.59518e-08	Candidatus Thioglobus	Thiosulfohydrolase	SoxB	0	0	0	1.44432	0	0	0	93.4948	21.267	97.3802	195.501	225.47	146.473	113.342	151.125	0	0	0	0	0.825321	0	0	11.4454	17.5128	18.2864
5_NODE_159_length_2027_cov_10.848825_g113_i0_1	-5.15184	2.01799e-31	1.1631e-27	Candidatus Thioglobus	Thiosulfohydrolase	SoxB	0	0	0	0	0	0	0	5.5824	0	3.50709	9.50517	4.47177	4.26068	4.14778	4.65882	0	3.51236	1.26172	0	14.0443	9.18391	18.4068	163.747	104.304	160.303
17_NODE_193_length_1935_cov_12.620579_g134_i0_1	5.68115	4.86038e-23	6.9124e-20	Candidatus Thioglobus	Thiosulfohydrolase	SoxB	0	0	0	0.894417	0	0	0	158.458	41.7048	156.025	319.387	306.591	169.782	189.057	208.535	0	1.2782	0	0	0	0.501323	3.34925	3.93765	2.71127	3.0884
17_NODE_998_length_849_cov_3.338462_g850_i0_1	6.20287	2.48687e-13	4.92914e-11	Candidatus Thioglobus	Thiosulfohydrolase	SoxB	0	0	0	0	0	0	0	24.9739	3.5978	36.0861	88.826	67.2177	66.7134	38.9673	60.0252	0	0	0	0	0	0	0	0	0	1.6874
18_NODE_975_length_754_cov_5.966423_g852_i0_1	4.97845	3.21645e-10	3.2888e-08	Candidatus Thioglobus	Thiosulfohydrolase	SoxB	0	0	0	0	0	0	0	41.4381	11.1932	30.5076	70.5569	78.4206	34.0979	28.8647	47.9831	0	0	0	0	0.651569	0	0	0	1.72823	1.31242
18_NODE_14450_length_228_cov_1.358491_g14316_i0_1	-5.57649	4.35041e-20	3.56861e-17	Candidatus Thioglobus	L-cysteine S-thiosulfotransferase	SoxX	0	1.54928	0	1.57244	0	0	0	3.57153	0	0	0	1.71658	2.04444	1.99026	3.57677	0	0	0	0	5.39121	0.881359	4.41615	71.9955	59.5822	63.3454
21_NODE_7713_length_278_cov_1.813397_g7599_i0_1	-5.64374	6.77104e-26	1.51324e-22	Candidatus Thioglobus	L-cysteine S-thiosulfotransferase	SoxX	0	0	0	0	0	0	0	3.7373	0	3.52189	4.24234	3.59251	4.27866	2.08264	7.48556	0	0	0	0	13.1634	7.37813	15.4037	234.704	103.497	185.599
3_NODE_691_length_1183_cov_63.125673_g172_i3_1	-3.7165	3.55785e-11	4.42244e-09	Candidatus Thioglobus	L-cysteine S-thiosulfotransferase	soxX	0	0	0	0	0	0	1.5168	1.5594	0	1.46952	8.85066	2.99797	7.14115	3.47595	4.68506	0	0	0	0	2.35391	4.61782	2.57091	77.3776	31.2177	39.5112
4_NODE_198_length_2431_cov_4.318798_g124_i0_1	2.20438	2.60634e-06	0.000108174	Candidatus Thioglobus	L-cysteine S-thiosulfotransferase	SoxX	0	0	0	0	0	0	0	48.2334	33.1639	46.8307	97.8889	123.639	133.867	84.7077	111.246	0	0	1.98211	0	0	0	0	14.7317	20.4821	11.8508
15_NODE_57_length_2438_cov_12.444913_g40_i0_1	3.1819	6.79519e-11	7.96718e-09	Candidatus Thioglobus	L-cysteine S-thiosulfotransferase	SoxX	0	0	0	0	0	0.596377	0	54.229	31.5499	34.0689	87.6007	89.5533	103.474	64.3133	90.5141	0.891573	0.874874	0	0.857011	1.39929	0.343135	0	8.6245	5.56725	4.93239
4_NODE_267_length_2076_cov_63.696064_g172_i0_4	-5.71913	2.5098e-35	2.89311e-31	Candidatus Thioglobus	thiosulfate oxidation carrier protein	SoxY	0	0	0	0	0	0	0	9.01189	2.78202	2.42642	18.998	16.088	17.6868	18.6529	15.4716	1.65097	0	0	1.58697	41.458	23.5097	46.6948	645.802	461.333	687.624
15_NODE_43_length_2897_cov_43.959689_g27_i0_4	8.54547	1.43487e-29	5.92947e-26	Candidatus Thioglobus	thiosulfate oxidation carrier protein	SoxY	1.59638	0	0	3.40581	0	1.65892	0	502.822	160.895	461.083	972.506	931.361	1284.16	618.598	854.114	0	0	0	0	0	0	0	4.4982	0	0
15_NODE_57_length_2438_cov_12.444913_g40_i0_2	3.68814	1.12126e-08	8.13977e-07	Candidatus Thioglobus	thiosulfate oxidation carrier protein	SoxY	1.09781	0	0	0	0	2.28164	0	81.1264	24.4283	52.638	169.082	212.217	140.078	96.3455	93.2323	0	0	0	0	1.33836	0	0	3.09336	7.09977	12.131
16_NODE_90_length_2445_cov_33.604377_g53_i1_4	5.59187	1.41449e-15	4.79051e-13	Candidatus Thioglobus	thiosulfate oxidation carrier protein	SoxY	0	0	0	0	0	0	0	364.486	46.5804	223.445	794.116	574.523	453.178	248.977	370.908	0	2.46591	0	0	0.986003	0	0	10.6351	3.92294	5.95815
19_NODE_171_length_1601_cov_6.377937_g145_i0_3	8.18011	1.88429e-13	3.82279e-11	Candidatus Thioglobus	thiosulfate oxidation carrier protein	SoxY	0	0	0	0	0	0	0	32.6145	5.56404	22.6466	83.7863	70.952	94.3296	63.133	63.6055	0	0	0	0	0	0	0	0	0	0
19_NODE_76_length_2477_cov_25.560216_g59_i0_4	3.66123	2.60781e-11	3.34131e-09	Candidatus Thioglobus	thiosulfate oxidation carrier protein	SoxY	0	0	0	0	0	1.28342	0	106.229	30.715	60.6277	180.027	189.845	150.736	115.059	131.857	0	0	0	1.84431	1.50565	0	0	4.64004	8.98565	10.6146
19_NODE_80_length_2386_cov_101.112646_g61_i0_2	8.87078	8.62686e-27	2.27643e-23	Candidatus Thioglobus	thiosulfate oxidation carrier protein	SoxY	0	0	0	0	0	0	0	142.074	40.7751	141.207	289.787	259.268	397.739	181.847	240.101	0	0	1.50521	0	0	0	0	0	0.740672	0
1_NODE_69_length_2429_cov_10.253814_g46_i0_3	-2.06323	5.11099e-08	3.21021e-06	Candidatus Thioglobus	SoxZ	SoxZ	0	0	0	1.73318	0	0	0	37.3979	10.6335	29.6778	91.6063	71.898	85.6303	52.6491	61.1071	0	0	0	0	24.7596	7.77163	14.6027	209.07	144.48	277.288
15_NODE_43_length_2897_cov_43.959689_g27_i0_3	4.70669	1.51657e-18	9.35653e-16	Candidatus Thioglobus	SoxZ	SoxZ	0	1.67783	1.99161	1.70291	0	0	0	518.293	131.642	402.764	1099.83	1016.88	1383.79	666.017	968.383	0	0	0	0	1.94617	1.90897	0	22.491	28.3913	27.4405
15_NODE_57_length_2438_cov_12.444913_g40_i0_3	3.36082	1.13716e-11	1.58333e-09	Candidatus Thioglobus	SoxZ	SoxZ	0	0	0	0	0	2.28164	0	220.77	47.4196	112.796	400.061	336.223	318.221	225.3	262.382	0	0	0	0	2.00754	0.656387	0	18.5602	17.7494	24.262
2_NODE_33_length_2385_cov_5.019430_g28_i0_3	-6.82078	2.86409e-29	1.1005e-25	Candidatus Thioglobus	SoxZ	SoxZ	0	0	0	0	0	0	0	3.52885	0	3.32545	2.00286	0	2.02001	0	1.76701	0	0	0	0	11.5413	4.35412	17.4535	180.573	110.676	178.824
3_NODE_229_length_2050_cov_79.447249_g172_i0_2	-2.37626	1.94629e-10	2.07837e-08	Candidatus Thioglobus	SoxZ	SoxZ	0	0	0	0	0	0	0	26.5722	3.5888	14.607	46.5014	44.6998	39.2942	25.9132	36.5903	0	1.39324	0	0	7.24219	3.27865	4.56336	148.504	97.5242	167.196
15_NODE_2002_length_466_cov_2.624685_g1924_i0_1	7.61762	2.30381e-11	3.00164e-09	endosymbiont of Bathymodiolus septemdierum str Myojin knoll	SoxZ	SoxZ	0	0	0	0	0	0	0	20.8901	2.25711	23.6232	35.5696	52.21	76.5315	62.8623	75.3146	0	0	0	0	0	0	0	0	0	0
1_NODE_36_length_3142_cov_59.377481_g21_i0_2	-6.99934	2.45931e-24	4.52632e-21	Methylococcaceae	methane monooxygenase	PmoA	0	2.32158	19.2904	2.35629	0	2.29542	1.30142	1.33798	0	0	0	5.14456	0	1.49119	0	25.7371	23.5714	16.33	37.9337	101.657	101.034	260.291	172.2	95.5332	124.755
10_NODE_6_length_3109_cov_39.589474_g4_i0_2	6.04564	6.53125e-13	1.18318e-10	Methylococcaceae	methane monooxygenase	pmoA	2.75902	102.943	380.353	200.133	125.777	21.5033	4.87666	399.419	54.1706	100.792	455.291	681.139	237.248	234.686	294.564	10.7157	31.545	22.6634	37.0811	1.68179	4.12409	2.75523	5.18284	1.1152	5.08129
2_NODE_12_length_3244_cov_63.342362_g10_i0_2	-8.44661	6.71576e-30	2.8286e-26	Methylococcaceae	methane monooxygenase	PmoA	3.09805	0	13.5278	1.6524	0	0	0	0	0	0	0	0	2.1484	0	0	4.81298	18.8913	20.3586	23.132	104.809	97.2482	281.536	209.51	117.71	136.936
16_NODE_60_length_3108_cov_21.460020_g32_i0_1	6.06019	1.8528e-15	6.0748e-13	Methylococcaceae	methane monooxygenase	pmoB	3.6076	145.347	507.088	223.204	124.26	16.2454	1.41701	549.217	61.3874	201.808	666.432	915.841	326.895	349.082	374.949	11.2092	38.4973	19.7559	37.7113	3.66508	5.75203	2.40177	4.51793	2.91639	8.85883
2_NODE_12_length_3244_cov_63.342362_g10_i0_3	-7.85734	5.0791e-29	1.91796e-25	Methylococcaceae	methane monooxygenase	pmoB	1.54903	8.1403	27.0556	3.30479	0	1.60971	1.8253	0	0	0	0	1.80386	0	0	1.87932	14.439	33.0599	20.3586	62.4565	163.351	129.664	331.037	219.694	108.945	154.054
4_NODE_101_length_3167_cov_34.671724_g58_i0_3	-8.57899	1.32719e-31	7.85615e-28	Methylococcus	methane monooxygenase	pmoB	0.594423	0.624751	3.70796	0.634091	0	0	0.350221	0	0.38903	0	0	0.346107	0	0	0	4.1556	4.98394	3.90621	5.32601	24.2765	20.9692	55.2055	42.4318	24.9877	29.5582
10_NODE_336_length_980_cov_7.577387_g284_i0_1	-9.00697	1.37103e-36	1.85925e-32	Methylococcaceae	methane monooxygenase	pmoC	4.85808	28.0827	156.067	38.867	4.42935	7.57261	32.9161	2.94266	0	0	3.34032	2.82865	0	8.19909	0	118.87	161.079	97.7688	215.827	1179.33	887.379	1793.81	1249.11	947.457	779.891
10_NODE_6_length_3109_cov_39.589474_g4_i0_1	5.80226	9.21191e-14	2.03795e-11	Methylococcaceae	methane monooxygenase	pmoC	22.0722	830.79	2282.12	1296.45	654.04	81.7127	29.2599	551.499	166.123	152.764	660.173	856.244	327.172	281.251	351.468	75.0099	98.8409	70.2565	121.544	15.977	24.7446	2.75523	7.77426	5.576	3.38753
12_NODE_6235_length_307_cov_1.012605_g6135_i0_1	-7.87209	1.34695e-25	2.92085e-22	Methylococcaceae	methane monooxygenase	pmoC	0	1.32035	6.26913	0	0	2.61094	1.48031	1.52189	0	0	0	1.46293	0	0	0	1.95166	7.66041	0	13.132	82.7023	61.5921	130.471	105.015	78.1981	64.7821
19_NODE_9752_length_248_cov_1.575419_g9673_i0_1	-4.68841	1.26435e-10	1.40781e-08	Sulfurimonas	ATP-citrate lyase alpha-subunit	AclA	0	0	0	0	0	0	0	3.09699	0	0	0	4.46551	7.09121	1.72582	1.55077	0	0	0	0	0	0	0	51.6245	73.3653	23.5409
20_NODE_172_length_1736_cov_11.034193_g26_i1_1	-2.26374	5.04749e-07	2.51077e-05	Sulfurimonas	ATP-citrate lyase alpha-subunit	AclA	0	0	0	0	0	0	0	24.365	0	39.1682	45.5537	35.8204	52.5071	83.0629	68.8962	0	0	0	0	0	2.82948	0	236.687	249.621	100.228
21_NODE_158_length_2083_cov_14.612214_g32_i1_2	-2.77513	8.48103e-08	5.06544e-06	Sulfurimonas	ATP-citrate lyase alpha-subunit	AclA	0	0	0	0	0	0	0	6.00502	0	7.07362	11.9289	12.9878	13.7497	31.7903	13.5311	0	0	0	0	0	0.740939	0	90.7875	100.179	42.6025
3_NODE_167_length_2333_cov_78.162544_g47_i4_2	-4.80103	9.07229e-18	4.68631e-15	Sulfurimonas	ATP-citrate lyase alpha-subunit	AclA	0	0	0	0	0	0	0	10.8458	0	1.70344	12.3115	10.4256	16.5558	16.1171	21.7234	0	0	0	0	0.909538	0.892151	1.49008	327.947	342.571	144.73
3_NODE_168_length_2333_cov_71.613074_g47_i5_2	-2.25903	7.25372e-07	3.47864e-05	Sulfurimonas	ATP-citrate lyase alpha-subunit	AclA	0	0	0	0	0	0	0	11.1765	1.50949	23.6978	50.7475	34.9164	44.7842	85.6379	69.9557	0	0	0	0	0	0	2.30327	216.633	222.811	113.274
3_NODE_403_length_1585_cov_78.880607_g47_i9_1	-2.98524	3.84507e-11	4.74712e-09	Sulfurimonas	ATP-citrate lyase alpha-subunit	AclA	0	0	0	0	0	0	0	4.8667	1.75277	30.5746	25.7804	32.7471	20.4294	34.3521	47.1138	0	0	0	0	0.816252	0.800648	1.33725	230.166	243.567	101.936
3_NODE_61_length_3305_cov_64.175525_g47_i0_2	-2.94646	6.8494e-08	4.17983e-06	Sulfurimonas	ATP-citrate lyase alpha-subunit	AclA	0	0	0	0	0	0	0	7.14307	1.54357	13.4627	25.9467	24.7188	14.72	39.8053	60.0897	0	0	0	0	0	0.705087	0	210.448	224.029	75.2905
4_NODE_50_length_4042_cov_75.604833_g26_i0_2	-3.46723	2.16221e-11	2.8357e-09	Sulfurimonas	ATP-citrate lyase alpha-subunit	AclA	0	0	0	0	0	0	0	16.0719	1.92946	35.3396	28.3792	36.0482	30.6666	59.7079	85.8424	0	0	0	0	0.898535	2.64408	2.9441	447.203	521.941	173.747
4_NODE_51_length_4042_cov_72.987918_g26_i1_2	-4.74419	4.46749e-20	3.61055e-17	Sulfurimonas	ATP-citrate lyase alpha-subunit	AclA	0	0	0	0	0	0	0	5.51291	1.98551	12.122	10.4298	26.4966	29.4535	36.8653	27.6049	0	0	0	0	0	0.906958	3.02962	588.419	603.318	245.842
5_NODE_313_length_1517_cov_26.880525_g34_i4_1	-2.57187	8.21183e-10	7.59518e-08	Sulfurimonas	ATP-citrate lyase alpha-subunit	AclA	0	0	0	0	0	0	0	7.45573	0	28.104	32.1604	30.1009	42.6786	39.8857	46.2933	0	0	0	0	0	0	2.45837	189.601	211.944	87.6537
5_NODE_47_length_3182_cov_21.344041_g34_i0_2	-1.83451	9.12865e-06	0.000332227	Sulfurimonas	ATP-citrate lyase alpha-subunit	AclA	0	0	0	0	0	0	0	8.08368	0	17.9561	19.0076	21.6464	21.8145	35.394	36.4299	0	0	0	0	0.29053	0.569953	0.951939	75.6562	85.9227	42.1343
5_NODE_48_length_3182_cov_20.664632_g34_i1_1	-4.49322	5.22399e-15	1.52254e-12	Sulfurimonas	ATP-citrate lyase alpha-subunit	AclA	0	0	0	0	0	0	0	4.00787	0	5.6653	9.09896	15.4104	9.17686	22.3342	30.1031	0	0	0	0	0	0.989036	0	318.504	336.982	119.828
5_NODE_49_length_3182_cov_19.712175_g34_i2_2	-3.04724	2.45298e-08	1.64346e-06	Sulfurimonas	ATP-citrate lyase alpha-subunit	AclA	0	0	0	0	0	0	0	13.5572	0	12.7758	20.5191	21.72	36.2158	50.3659	64.8685	0	0	0	0	0	2.23038	1.24173	263.946	269.393	96.1816
5_NODE_72_length_2823_cov_21.440450_g34_i3_2	-2.26465	7.19288e-07	3.45324e-05	Sulfurimonas	ATP-citrate lyase alpha-subunit	AclA	0	0	0	0	0	0	0	18.2251	0	32.6318	24.8256	38.5418	52.1627	62.9677	73.0073	0	0	0	0	0	1.79899	1.50234	203.474	212.829	96.0496
20_NODE_11088_length_249_cov_3.150000_g10977_i0_1	-3.37517	1.11853e-05	0.000398466	Sulfurimonas	ATP-citrate lyase subB	AclB	0	0	0	0	0	0	0	0	0	1.56896	1.88992	0	3.81219	7.42234	0	0	0	0	0	0	0	0	30.9801	21.1091	8.43698
21_NODE_13123_length_226_cov_3.050955_g13009_i0_1	-4.05486	2.52603e-06	0.00010518	Sulfurimonas	ATP-citrate lyase subB	AclB	0	0	0	0	0	0	0	1.83004	0	0	0	7.03656	6.28539	0	10.9963	0	0	0	0	0	0	0	63.8485	78.1562	11.1284
3_NODE_61_length_3305_cov_64.175525_g47_i0_1	-4.7082	3.316e-11	4.1477e-09	Sulfurimonas	ATP-citrate lyase subB	AclB	0	0	0	0	0	0	0	8.57168	0	1.34627	3.24334	5.49306	24.5333	11.1455	15.7378	0	0	0	0	0	0.705087	1.17764	264.722	257.395	68.0511
3_NODE_62_length_3305_cov_61.902967_g47_i1_1	-5.06887	4.85539e-16	1.8024e-13	Sulfurimonas	ATP-citrate lyase subB	AclB	0	0	0	0	0	0	0	2.88828	0	1.81454	5.46432	6.47823	9.91999	2.14602	5.78503	0	0	0	0	0	0	2.38088	179.146	173.462	43.909
3_NODE_63_length_3305_cov_60.169963_g47_i2_1	-4.14715	6.00151e-16	2.19806e-13	Sulfurimonas	ATP-citrate lyase subB	AclB	0	0	0	0	0	0	0	7.60292	0	8.95588	23.7334	10.9625	28.2888	23.3023	22.8422	0	0	0	0	2.86914	2.8143	6.26727	337.468	320.895	123.289
4_NODE_50_length_4042_cov_75.604833_g26_i0_3	-4.884	1.07339e-15	3.75947e-13	Sulfurimonas	ATP-citrate lyase subB	AclB	0	0	0	0	0	0	0	5.3573	0	5.04851	4.05417	8.58291	16.3555	17.9124	8.94192	0	0	0	0	0	2.64408	0	274.137	314.594	86.8737
5_NODE_1417_length_604_cov_18.216822_g1223_i0_1	-3.372	3.74158e-15	1.13187e-12	Sulfurimonas	ATP-citrate lyase subB	AclB	0	0	0	0	0	0	0	0	0	4.22984	10.1902	14.3822	20.5549	16.6752	17.9805	0	0	0	0	1.50565	2.21531	6.1667	100.921	116.813	110.695
5_NODE_47_length_3182_cov_21.344041_g34_i0_1	-3.48768	1.53088e-13	3.20239e-11	Sulfurimonas	ATP-citrate lyase subB	AclB	0	0	0	0	0	0	0	4.01566	0	6.48721	7.16307	9.37449	11.165	14.0659	15.5117	0	0	0	0	0	0.283131	0.472887	102.297	120.202	44.187
5_NODE_1285_length_655_cov_6.930034_g1097_i0_1	-3.05965	8.16548e-05	0.00230551	Sulfurimonas	Arsenate reductase	ArsC	0	0	0	0	0	0	0	0	0	3.02423	0	0	3.67407	5.36506	6.42782	0	0	0	0	0	0	1.32271	6.22034	16.0613	42.2827
5_NODE_470_length_1234_cov_41.762232_g366_i0_2	-2.8636	2.38703e-07	1.28358e-05	Sulfurimonas	Ferritin like domain	Cft	0	0	0	0	0.594133	0	0	8.28901	1.27943	22.8758	17.4741	18.2123	22.3686	24.4153	20.16	0	0	0.802914	0	4.17074	3.7988	8.29701	51.8717	46.2256	274.229
6_NODE_17346_length_268_cov_2.552764_g17158_i0_1	-3.11996	4.40457e-07	2.22021e-05	Sulfurimonas	Ferritin like domain	Cft	0	0	0	0	0	0	0	1.21556	0	4.582	3.67954	1.94745	5.10269	3.6127	1.62313	0	0	0	0	0.611629	0.599937	1.00202	10.681	11.6264	51.332
6_NODE_6676_length_371_cov_2.003311_g6488_i0_1	-3.21674	3.26335e-07	1.69609e-05	Sulfurimonas	Ferritin like domain	Cft	0	0	0	0	0	0	0	14.1342	0	5.91977	8.91343	13.5866	16.1815	15.7527	6.29105	0	0	0	0	2.3706	2.32529	5.17828	29.2224	37.727	181.449
2_NODE_5894_length_312_cov_1.102881_g5803_i0_1	-4.72905	6.26414e-11	7.404e-09	Sulfurimonas	Cytochrome aa3 oxidase	CoxA/COX1	0	0	0	0	0	0	0	1.61044	0	1.51761	0	0	1.84371	3.58971	1.6128	0	0	0	0	1.62063	0	3.98257	29.9662	47.2845	17.9539
15_NODE_70_length_2277_cov_7.420290_g50_i0_2	2.99795	2.84306e-06	0.000117045	Sulfurimonas	Cytochrome aa3 oxidase	ctaD/CoxA/COX1	0	0	0	0	0	0	0.873776	73.662	4.85301	109.204	151.937	138.162	234.485	362.43	388.642	0	0	0	0	0.452002	0.443361	0	22.9837	29.9724	10.0149
3_NODE_33_length_4320_cov_42.155258_g24_i0_4	-4.00825	4.03855e-14	9.64575e-12	Sulfurimonas	Cytochrome aa3 oxidase	ctaD/CoxA/COX1	0	0	0	0	0	0	0	11.4535	0	14.3912	17.3351	36.6993	39.3379	53.1881	63.0868	0	0	0	0	0	0	4.72071	552.045	561.758	222.489
4_NODE_39_length_4185_cov_43.355199_g21_i0_2	-4.80601	3.46755e-18	1.95736e-15	Sulfurimonas	Cytochrome aa3 oxidase	ctaD/CoxA/COX1	0	0	0	0	0	0	0	8.78711	0	6.62451	7.97964	15.204	8.04796	13.7107	29.92	0	0	0	0	0.884273	4.33684	2.89737	343.363	365.892	151.397
5_NODE_29_length_3606_cov_14.868533_g22_i0_3	-4.57412	6.12516e-22	7.21247e-19	Sulfurimonas	Cytochrome aa3 oxidase	ctaD/CoxA/COX1	0	0	0	0	0	0	0	9.87814	0	6.20586	11.213	17.4083	16.9635	23.8536	16.4877	0	0	0	0	0.828389	4.06277	4.0714	301.24	347.163	175.201
5_NODE_52_length_3118_cov_16.540833_g22_i2_2	-3.80986	3.2872e-14	7.97294e-12	Sulfurimonas	Cytochrome aa3 oxidase	ctaD/CoxA/COX1	0	0	0	0	0	0	0	15.8168	0	21.5296	13.9644	38.8547	54.3237	43.0908	54.5599	0	0	0	0	5.30564	3.46948	7.24342	479.618	494.892	210.175
6_NODE_14273_length_287_cov_1.068807_g14085_i0_1	-4.32536	9.5929e-08	5.65854e-06	Sulfurimonas	Cytochrome aa3 oxidase	ctaD/CoxA/COX1	0	0	0	0	0	0	0	3.20147	0	0	0	0	3.66522	1.18936	2.13744	0	0	0	0	0	0.526691	0	14.8929	32.0452	7.57092
6_NODE_8861_length_337_cov_1.097015_g8673_i0_1	-4.44908	1.43306e-13	3.01215e-11	Sulfurimonas	Cytochrome aa3 oxidase	cyoB/CoxA/COX1	0	0	0	0	0	0	0	0	0	0	4.42923	1.87538	2.23357	2.17439	7.81532	0	0	0	0	0	2.88868	0	57.4793	61.1886	43.5006
15_NODE_29_length_3858_cov_33.239905_g17_i0_3	4.38865	1.4886e-08	1.0433e-06	Sulfurimonas	FCSD-flav bind	FccB	0	0	0	0	0	0	0	505.432	60.4805	842.445	854.059	906.814	2291.96	2543.16	2618.25	0	0	0	0	1.65678	0.812554	0	22.976	39.5502	123.475
6_NODE_4915_length_417_cov_1.261494_g4727_i0_1	-2.83686	5.06553e-05	0.00151212	Sulfurimonas	FCSD-flav bind	FccB	0	0	0	0	0	0	0	0	0	0	1.94852	1.65005	7.8608	7.65249	3.43813	0	0	0	0	0	3.38879	0	9.31605	20.6182	33.0547
2_NODE_8706_length_273_cov_1.068627_g8615_i0_1	-6.82665	4.82936e-12	7.25955e-10	Sulfurimonas	Cytochrome cbb3 oxidase	FixN/CcoN/COX1	0	0	0	0	0	0	0	0	0	0	0	0	0	0	0	0	0	0	0	0	0	3.24505	24.4169	24.9557	15.959
5_NODE_474_length_1228_cov_12.326143_g75_i5_1	-3.18685	9.03242e-11	1.03357e-08	Sulfurimonas	Cytochrome cbb3 oxidase	FixN/CcoN/COX1	0	0	0	0	0	0	0	0	0	2.2931	4.14328	3.50862	5.57166	2.71201	7.31076	0	0	0	1.49977	0	0	1.00294	28.2991	31.6637	30.8274
3_NODE_1380_length_732_cov_13.197587_g186_i8_1	-6.91967	4.29297e-12	6.54761e-10	Sulfurimonas	Cytochrome cbb3 oxidase	FixN/CcoN/COX1	0	0	0	0	0	0	0	0	0	0	0	0	0	0	0	0	0	0	0	0	0.962894	0	22.6892	29.9434	15.8184
3_NODE_447_length_1505_cov_10.604457_g186_i2_1	-2.99346	6.37822e-08	3.93063e-06	Sulfurimonas	Cytochrome cbb3 oxidase	FixN/CcoN/COX1	0	0	0	0	0	0	0	3.60057	0	1.69652	2.04357	10.3832	2.06106	10.0322	10.8175	0	0	0	0	0	0	1.48402	36.2904	39.644	40.1408
3_NODE_663_length_1209_cov_11.079825_g186_i5_1	-3.93653	7.15901e-09	5.44995e-07	Sulfurimonas	Cytochrome cbb3 oxidase	FixN/CcoN/COX1	0	0	0	0	0	0	0	0	0	0	0	2.84757	3.39145	1.65079	1.48334	0	0	0	0	0	0	1.22097	13.7805	24.7097	21.0163
3_NODE_665_length_1207_cov_9.283831_g186_i6_2	-3.99103	9.5769e-09	7.05283e-07	Sulfurimonas	Cytochrome cbb3 oxidase	FixN/CcoN/COX1	0	0	0	0	0	0	0	3.9192	0	3.69331	0	5.65105	0	0	1.96247	0	0	0	0	0	0	0	30.3861	31.3835	19.8605
4_NODE_31_length_4349_cov_16.503271_g18_i0_1	-3.58695	4.31402e-12	6.57514e-10	Sulfurimonas	Cytochrome cbb3 oxidase	FixN/CcoN/COX1	0	0	0	0	0	0	0	1.90892	0	1.7989	6.50066	3.66993	8.74175	10.6376	5.73516	0	0	0	0	0.960503	1.88428	0	47.3604	63.6914	59.9753
4_NODE_32_length_4349_cov_16.165888_g18_i1_1	-4.38656	2.72438e-13	5.35147e-11	Sulfurimonas	Cytochrome cbb3 oxidase	FixN/CcoN/COX1	0	0	0	0	0	0	0	0.907521	0	1.71043	2.06032	3.48944	2.07796	0	1.8177	0	0	0	0	0.456633	0.447904	0	33.0698	41.1801	19.3152
4_NODE_34_length_4349_cov_14.406075_g18_i3_1	-2.43381	0.000227344	0.00562817	Sulfurimonas	Cytochrome cbb3 oxidase	FixN/CcoN/COX1	0	0	0	0	0	0	0	1.91305	1.03349	5.40834	1.08578	0	4.38032	6.39636	10.5372	1.22664	0	0	0	0.481289	0	0	13.3489	24.8933	20.3581
4_NODE_35_length_4349_cov_14.255140_g18_i4_6	-3.04097	4.7476e-09	3.75654e-07	Sulfurimonas	Cytochrome cbb3 oxidase	FixN/CcoN/COX1	0	0	0	0	0	0	0	1.45681	0	5.49137	3.30735	4.20111	8.33917	12.9891	4.37684	0	0	0	0	0	0	0	37.273	47.6344	38.3883
4_NODE_49_length_4046_cov_13.315564_g18_i6_6	-2.79455	1.32635e-05	0.000462717	Sulfurimonas	Cytochrome cbb3 oxidase	FixN/CcoN/COX1	0	0	0	0	0	0	0	3.01272	0	1.41954	1.70992	4.344	1.72456	10.0732	15.0857	0	0	0	0	0.757948	0.743459	0	25.6938	39.2027	25.9538
5_NODE_107_length_2436_cov_10.383185_g75_i0_3	-4.43939	2.20858e-12	3.60447e-10	Sulfurimonas	Cytochrome cbb3 oxidase	FixN/CcoN/COX1	0	0	0	0	0	0	1.51148	3.10786	0	0	5.29176	0	3.55805	3.46376	7.78104	1.99274	0	0	0	0	0	2.56189	59.0343	70.5119	37.7977
5_NODE_108_length_2436_cov_9.128010_g75_i1_1	-2.82454	8.81919e-07	4.13876e-05	Sulfurimonas	Cytochrome cbb3 oxidase	FixN/CcoN/COX1	0	0	0	0	0	0	0	4.61323	0	1.44911	3.49109	11.8253	5.28147	17.1384	16.94	0	0	0	0	0	1.5179	0	45.3048	59.516	45.1964
5_NODE_488_length_1209_cov_7.423684_g75_i6_1	-2.15251	8.94158e-05	0.00249601	Sulfurimonas	Cytochrome cbb3 oxidase	FixN/CcoN/COX1	0	0	0	0	0	0	0	3.12982	0	2.94943	5.32916	6.01713	1.7916	6.97647	12.5376	0	0	0	0	0	0	0	18.1994	24.0182	19.0324
2_NODE_11_length_3292_cov_5.779088_g9_i0_2	-2.2012	9.89972e-05	0.00272972	Sulfurimonas	NiFe hydrogenase group 1b	[NiFe]hyd-1b	0	0	0	0	0	0	0	344.669	47.8507	261.294	472.117	633.015	1657.74	1744.72	1930.27	0	0	0	0	16.4705	35.1624	93.648	4118.86	3789.18	3516.62
3_NODE_186_length_2238_cov_5.774550_g138_i0_2	-4.13565	3.25389e-13	6.28449e-11	Sulfurimonas	NiFe hydrogenase group 1b	[NiFe]hyd-1b	0	0	0	0	0	0	0	0	0	0.500412	2.41112	1.02089	3.0397	4.73463	3.72258	0	0	0	0	1.87033	1.04833	8.31691	47.3462	16.6545	43.0549
6_NODE_48_length_2542_cov_4.776789_g33_i0_2	-2.40856	4.46231e-05	0.0013527	Sulfurimonas	NiFe hydrogenase group 1b	[NiFe]hyd-1b	0	1.73856	2.06371	0	0	0	0	320.63	47.6342	245.496	359.409	604.858	1670.19	1572.33	1932.62	0	0	2.71755	0	17.1413	47.4737	89.2023	4417.11	4162.8	3972.6
3_NODE_242_length_1996_cov_6.006227_g182_i0_1	-2.02606	0.000133696	0.00353561	Sulfurimonas	Assimilatory nitrate reduction	nasA	0	0	0	0	0	0	0	4.38485	0	5.78496	3.98192	10.1159	15.06	22.4801	26.3477	1.12462	0	0	0	0.441261	0.432826	1.44582	36.0361	43.3051	49.7732
4_NODE_46_length_4077_cov_6.978543_g24_i0_2	-1.72295	8.03153e-05	0.0022715	Sulfurimonas	Assimilatory nitrate reduction	nasA	0	0	0	0	0	0	0	4.72395	0.85068	5.56458	8.9372	7.94663	17.1261	16.6722	17.3465	0	0	0	0	0	0.971453	1.62253	31.1316	35.726	23.5396
5_NODE_334_length_1464_cov_5.980645_g250_i0_1	-2.3403	7.74621e-06	0.000287212	Sulfurimonas	Assimilatory nitrate reduction	nasA	0	0	0	0	0	0	0	4.61323	0	14.4911	10.4733	8.869	12.3234	41.1321	26.18	0	0	0	0	0	0	1.2676	61.9961	64.6467	98.1854
3_NODE_270_length_1922_cov_5.242310_g201_i0_1	-2.349	2.10775e-07	1.14578e-05	Sulfurimonas	Ferredoxin-nitrite reductase	nirA	0	0	0	0	1.14539	0	0	10.2728	1.23327	6.45377	9.06965	13.1664	26.1351	17.8098	16.0033	0	0	0	0	1.14864	3.9434	3.76359	40.708	54.8402	76.3503
4_NODE_64_length_3670_cov_11.616495_g37_i0_4	-2.17891	3.89748e-06	0.000154922	Sulfurimonas	Ferredoxin-nitrite reductase	nirA	0	1.04125	0	0	0	0	0	2.40038	1.29677	10.1791	8.17427	17.3054	30.2289	24.0773	22.837	0	0	0	1.47945	1.20779	2.3694	7.91477	43.7346	53.6595	99.7439
5_NODE_55_length_3059_cov_14.435786_g39_i0_1	-1.80541	2.33305e-05	0.000766777	Sulfurimonas	Ferredoxin-nitrite reductase	nirA	0	0	0	0	0	0	0	8.82798	1.58973	23.5709	25.0524	25.4579	32.0047	36.076	30.9432	0	0	0	0	0.740321	2.17851	2.42571	39.9259	76.582	117.804
20_NODE_9_length_5822_cov_24.769164_g7_i0_3	4.43033	0.000341255	0.00801771	Sulfurimonas	L-cysteine S-thiosulfotransferase	SoxA	0	0	0	0	0	0	0	17.9058	1.28978	5.62458	25.7456	41.309	291.093	360.544	325.168	0	0	0	0	0	0.589156	0.984012	3.70203	5.576	8.46882
18_NODE_3311_length_403_cov_1.002994_g3177_i0_1	6.97402	0.000128022	0.00341027	Sulfurimonas	thiosulfohydrolase	soxB	0	0	0	0	0	0	0	1.58735	0	0.747928	1.80186	4.57755	18.1728	31.8442	23.0503	0	0	0	0	0	0	0	0	0	0
19_NODE_27_length_3879_cov_23.365617_g22_i0_2	4.22301	0.000189327	0.00480209	Sulfurimonas	thiosulfohydrolase	SoxB	0	0	0	0	0	0	0	23.8469	2.45388	14.9816	36.0925	43.6628	386.116	423.977	332.071	0	0	0	0	0	0.560454	0	11.4454	6.06211	6.90534
21_NODE_12_length_5473_cov_25.600851_g10_i0_5	4.26826	0.000167019	0.00430102	Sulfurimonas	thiosulfohydrolase	SoxB	0	0	1.93254	0	0	0	0	30.0251	0	19.4525	51.1238	79.3701	629.48	524.957	482.985	0	0	0	0	0	0	1.5469	7.27464	11.2701	15.2152
3_NODE_504_length_1397_cov_8.348645_g397_i0_2	-1.84085	1.63449e-06	7.16558e-05	Sulfurimonas	sulfite dehydrogenase	soxC	0	0	0	0	0	0	0	16.7121	0	18.3736	34.7792	29.4518	30.2937	31.0431	37.6573	0	0	0	0	0.700745	4.12409	8.0361	57.2272	68.7707	125.621
4_NODE_620_length_1293_cov_8.204248_g447_i0_2	-2.77575	2.4621e-06	0.000102831	Sulfurimonas	thiosulfate oxidation carrier protein	SoxY	0	0	0	0	0	0	0	7.83841	0	2.76998	5.56104	3.76736	4.48692	8.73603	7.8499	0	0	0	0	0.493002	0.483577	2.42302	12.1544	19.6147	58.5885
4_NODE_198_length_2431_cov_4.318798_g124_i0_3	2.08909	2.0032e-05	0.000668806	Sulfurimonas	SoxZ	SoxZ	0	0	0	0	0	0	0	80.9725	17.8547	52.9466	135.058	109.605	158.917	75.5112	86.056	0	0	0	0	0	0	0	14.0933	19.8489	20.0976

## Sheet: Suppl.Table10
Supplementary Table 10: Differential expression analysis with edgeR of NTU (SSU rRNA); cutoff: FDR < 0.01
Domain;Phylum;Class;Order;Family;Genus	logFC (PO.P / AU.P)	logCPM	P-Value	FDR
Bacteria;Proteobacteria;Gammaproteobacteria;Methylococcales;Methylococcaceae;Methylocaldum	-7.17631	4.27169	4.88e-10	9.56e-08
Bacteria;Proteobacteria;Gammaproteobacteria;Methylococcales;Methylomonaceae;IheB2-23	-6.71432	11.1293	3.84e-23	1.2e-19
Bacteria;Proteobacteria;Gammaproteobacteria;Methylococcales;Cycloclasticaceae;Cycloclasticus	-6.55106	10.5348	3.35e-26	2.1e-22
Bacteria;Proteobacteria;Gammaproteobacteria;Nitrococcales;Nitrococcaceae;uncultured	-6.15247	5.52185	1.03e-14	5.39e-12
Bacteria;Elusimicrobia;Elusimicrobia;Lineage IV;uncultured bacterium	-5.84193	3.37723	2.51e-06	0.00017856
Eukaryota;SAR;Rhizaria;Cercozoa;Phaeodina sp. Go1	-5.8177	4.11106	5.37e-05	0.00227351
Bacteria;Proteobacteria;Gammaproteobacteria;Methylococcales;Methylomonaceae;Methylomicrobium	-5.77451	5.81956	2.45e-15	1.7e-12
Bacteria;Epsilonbacteraeota;Campylobacteria;Campylobacterales;Rs-M59 termite group;uncultured bacterium	-5.48429	3.19795	6.88e-05	0.00283854
Bacteria;Dadabacteria;Dadabacteriia;Dadabacteriales;uncultured marine bacterium	-5.43269	3.17842	2.52e-05	0.00124503
Bacteria;Proteobacteria;Deltaproteobacteria;Desulfobacterales;Desulfobulbaceae;Desulfocapsa	-5.07867	10.7272	4.1e-15	2.34e-12
Bacteria;Proteobacteria;Gammaproteobacteria;Methylococcales;Methylococcaceae;Methylogaea	-4.8192	3.45161	5.6e-06	0.00034735
Bacteria;Epsilonbacteraeota;Campylobacteria;Campylobacterales;Campylobacteraceae;Campylobacter	-4.44732	4.98536	5.37e-09	8.42e-07
Bacteria;Bacteroidetes;Bacteroidia;Sphingobacteriales;ST-12K33;uncultured bacterium	-4.37915	3.84244	7.55e-06	0.00045523
Eukaryota;SAR;Stramenopiles;Ochrophyta;MOCH-2;uncultured marine eukaryote	-4.25635	3.49937	1.77e-05	0.00092615
Bacteria;Epsilonbacteraeota;Campylobacteria;Campylobacterales;Sulfurovaceae;Sulfurovum	-4.20829	8.69313	3.23e-15	2.03e-12
Bacteria;Epsilonbacteraeota;Campylobacteria;Campylobacterales;Sulfurospirillaceae;Sulfurospirillum	-4.19575	4.87979	1.8e-07	1.92e-05
Bacteria;Dadabacteria;Dadabacteriia;Dadabacteriales;marine metagenome	-4.11574	3.88785	2.83e-05	0.00137471
Bacteria;Proteobacteria;Gammaproteobacteria;211ds20;uncultured bacterium	-4.0345	4.06851	1.12e-06	8.86e-05
Bacteria;Proteobacteria;Gammaproteobacteria;Methylococcales;Methylomonaceae;Methylomonas	-3.98208	4.94923	4.2e-08	5.27e-06
Bacteria;Epsilonbacteraeota;Campylobacteria;Campylobacterales;Thiovulaceae;Sulfuricurvum	-3.96111	4.19313	1.03e-06	8.35e-05
Bacteria;Proteobacteria;Gammaproteobacteria;Chromatiales;Sedimenticolaceae;uncultured	-3.90035	5.52936	6.57e-09	1.01e-06
Bacteria;Proteobacteria;Deltaproteobacteria;Oligoflexales;053A03-B-DI-P58;uncultured delta proteobacterium	-3.82242	6.06413	1.1e-10	2.38e-08
Bacteria;Proteobacteria;Gammaproteobacteria;Cardiobacteriales;Wohlfahrtiimonadaceae;Wohlfahrtiimonas	-3.67199	3.47221	0.00027933	0.00898017
Bacteria;Lentisphaerae;Oligosphaeria;SS1-B-02-17;uncultured Lentisphaerae bacterium	-3.63418	3.64556	7.51e-05	0.00305831
Bacteria;Acidobacteria;Acidobacteriia;Subgroup 13;uncultured bacterium	-3.58607	4.21564	2.09e-05	0.00105759
Bacteria;Epsilonbacteraeota;Campylobacteria;Campylobacterales;Thiovulaceae;Sulfurimonas	-3.54212	18.8632	5.69e-12	1.7e-09
Bacteria;Proteobacteria;Gammaproteobacteria;AT-s2-59;uncultured bacterium	-3.49465	6.16032	3.67e-07	3.65e-05
Bacteria;Proteobacteria;Gammaproteobacteria;Methylococcales;Methylomonaceae;pItb-vmat-59	-3.43792	4.11646	4.25e-05	0.00191656
Bacteria;Proteobacteria;Gammaproteobacteria;Methylococcales;Methylococcaceae;Methyloparacoccus	-3.36915	3.96603	3.86e-05	0.00175486
Bacteria;Bacteroidetes;Bacteroidia;Sphingobacteriales;Lentimicrobiaceae;uncultured deep-sea archaeon	-3.21372	5.66669	1.85e-08	2.57e-06
Bacteria;Proteobacteria;Gammaproteobacteria;Methylococcales;Methylomonaceae;Methylovulum	-3.20881	3.85998	8.98e-05	0.00352
Bacteria;Proteobacteria;Alphaproteobacteria;uncultured;marine sediment metagenome	-3.18493	4.10775	0.0001617	0.00569507
Bacteria;Proteobacteria;Gammaproteobacteria;Alteromonadales;Alteromonadaceae;Rheinheimera	-3.16353	7.66727	0.00013345	0.00486385
Bacteria;Proteobacteria;Gammaproteobacteria;Pseudomonadales;Moraxellaceae;uncultured	-3.13442	4.58363	1.43e-05	0.00077522
Bacteria;Proteobacteria;Gammaproteobacteria;Alteromonadales;Alteromonadaceae;Alishewanella	-3.13115	4.13894	0.00012307	0.00456523
Bacteria;Dadabacteria;Dadabacteriia;Dadabacteriales;metagenome	-3.01761	3.89176	0.0002129	0.00717575
Bacteria;Proteobacteria;Gammaproteobacteria;Beggiatoales;Beggiatoaceae;uncultured	-2.96784	4.40663	2.86e-05	0.00137772
Bacteria;Proteobacteria;Gammaproteobacteria;Ectothiorhodospirales;Ectothiorhodospiraceae;Thioalkalivibrio	-2.96395	4.16571	0.00029332	0.00936215
Bacteria;Proteobacteria;Deltaproteobacteria;Myxococcales;P3OB-42;uncultured marine microorganism	-2.92577	7.43118	2.59e-08	3.38e-06
Bacteria;Schekmanbacteria;uncultured proteobacterium	-2.86579	5.53143	6.17e-07	5.61e-05
Bacteria;Proteobacteria;Gammaproteobacteria;Thiomicrospirales;Thioglobaceae;V38	-2.82332	5.47011	1.24e-06	9.59e-05
Bacteria;Proteobacteria;Gammaproteobacteria;Immundisolibacterales;Immundisolibacteraceae;Immundisolibacter	-2.66737	5.20809	7.21e-05	0.00295294
Bacteria;Proteobacteria;Alphaproteobacteria;Thalassobaculales;uncultured;uncultured Rhodospirillaceae bacterium	-2.6066	4.96507	5.53e-05	0.00231158
Bacteria;Elusimicrobia;Endomicrobia;Endomicrobiales;Endomicrobiaceae;Candidatus Endomicrobium	-2.5602	5.72003	2e-05	0.00102081
Bacteria;Proteobacteria;Gammaproteobacteria;SAR86 clade;uncultured gamma proteobacterium HF0770 40P16	-2.48173	6.15399	2.54e-05	0.00124503
Bacteria;Proteobacteria;Alphaproteobacteria;Rhodospirillales;Magnetospiraceae;Magnetospira	-2.4658	8.61098	7.2e-06	0.00043814
Bacteria;Proteobacteria;Alphaproteobacteria;Thalassobaculales;Nisaeaceae;OM75 clade	-2.41944	5.59388	3.09e-05	0.0014596
Bacteria;Proteobacteria;Alphaproteobacteria;uncultured;uncultured Rhodospirillales bacterium	-2.40478	4.86851	0.00031125	0.00975619
Bacteria;Bacteroidetes;Bacteroidia;Sphingobacteriales;Lentimicrobiaceae;uncultured bacterium	-2.32809	7.0109	4e-06	0.00026393
Bacteria;Proteobacteria;Alphaproteobacteria;Rhodovibrionales;Kiloniellaceae;uncultured	-2.07503	7.09835	5.48e-05	0.00230751
Bacteria;Proteobacteria;Alphaproteobacteria;Rhodospirillales;Magnetospiraceae;uncultured	-2.00905	10.6633	0.00023066	0.00769164
Bacteria;Proteobacteria;Deltaproteobacteria;Myxococcales;P3OB-42;uncultured delta proteobacterium	-1.73806	7.86672	0.00029979	0.00949196
Eukaryota;SAR;Alveolata;Ciliophora;Intramacronucleata;Conthreep	2.09887	12.4622	0.00013272	0.00486385
Eukaryota;SAR;Alveolata;Dinoflagellata;Incertae Sedis;Paulsenella	2.22067	7.04058	0.00031952	0.00995162
Eukaryota;Incertae Sedis;Telonema;uncultured eukaryote	2.30202	7.44816	0.00012174	0.00454281
Eukaryota;SAR;Stramenopiles;MAST-3;MAST-3I;uncultured stramenopile	2.35302	7.89006	0.00020447	0.00700462
Bacteria;Proteobacteria;Gammaproteobacteria;Cellvibrionales;Porticoccaceae;SAR92 clade	2.40757	6.84908	0.00015192	0.00541134
Bacteria;Proteobacteria;Gammaproteobacteria;Enterobacteriales;Enterobacteriaceae;Escherichia-Shigella	2.56082	8.85425	3.1e-05	0.0014596
Bacteria;Bacteroidetes;Bacteroidia;Flavobacteriales;Cryomorphaceae;NS10 marine group	2.58296	7.05709	8.15e-05	0.00327652
Bacteria;Bacteroidetes;Bacteroidia;Cytophagales;Cyclobacteriaceae;uncultured	2.61756	7.40977	8.22e-05	0.00328215
Bacteria;Bacteroidetes;Bacteroidia;Flavobacteriales;Flavobacteriaceae;uncultured	2.79604	7.52513	1.12e-05	0.00063793
Bacteria;Bacteroidetes;Bacteroidia;Flavobacteriales;NS9 marine group;uncultured bacterium	2.81672	8.31794	3.32e-06	0.00022623
Bacteria;Proteobacteria;Gammaproteobacteria;Cellvibrionales;Cellvibrionaceae;uncultured	2.87372	7.36871	9.44e-06	0.00055296
Bacteria;Proteobacteria;Gammaproteobacteria;Cellvibrionales;Spongiibacteraceae;BD1-7 clade	2.89997	7.72567	4.2e-06	0.00027176
Bacteria;Proteobacteria;Gammaproteobacteria;Oceanospirillales;Saccharospirillaceae;uncultured	2.91477	9.2103	5.2e-07	4.94e-05
Bacteria;Proteobacteria;Deltaproteobacteria;Bdellovibrionales;Bacteriovoracaceae;Halobacteriovorax	3.08814	6.5393	1.2e-05	0.00067305
Bacteria;Bacteroidetes;Bacteroidia;Flavobacteriales;Cryomorphaceae;uncultured	3.20989	9.2926	6.14e-07	5.61e-05
Bacteria;Proteobacteria;Gammaproteobacteria;Alteromonadales;Pseudoalteromonadaceae;uncultured	3.26769	7.17155	1.48e-06	0.00010951
Bacteria;Proteobacteria;Deltaproteobacteria;Bdellovibrionales;Bacteriovoracaceae;Peredibacter	3.34315	8.27034	1.31e-07	1.52e-05
Bacteria;Bacteroidetes;Bacteroidia;Flavobacteriales;Crocinitomicaceae;Crocinitomix	3.44347	7.44111	5.84e-07	5.46e-05
Bacteria;Proteobacteria;Alphaproteobacteria;Rhodospirillales;Terasakiellaceae;uncultured	3.49012	5.51295	0.00014074	0.00509682
Bacteria;Bacteroidetes;Bacteroidia;Flavobacteriales;Flavobacteriaceae;[Polaribacter] huanghezhanensis	3.58318	5.12733	0.00024657	0.00813559
Bacteria;Aquificae;Aquificae;Aquificales;Aquificaceae;uncultured	3.59147	5.13462	0.00020874	0.00711203
Eukaryota;SAR;Stramenopiles;MAST-7;MAST-7A;uncultured stramenopile	3.60885	6.95594	3.45e-06	0.00023033
Bacteria;Bacteroidetes;Bacteroidia;Flavobacteriales;NS9 marine group;uncultured marine bacterium	3.66852	5.96702	1.46e-05	0.00077945
Bacteria;Proteobacteria;Gammaproteobacteria;Oceanospirillales;Kangiellaceae;Kangiella	3.87166	5.37108	4.47e-05	0.00198836
Bacteria;Proteobacteria;Gammaproteobacteria;Gammaproteobacteria Incertae Sedis;Unknown Family;Marinicella	3.88383	7.20983	0.00011298	0.00429242
Bacteria;Epsilonbacteraeota;Campylobacteria;Nautiliales;Nautiliaceae;Caminibacter	3.9023	5.82843	1.2e-05	0.00067305
Bacteria;Patescibacteria;Gracilibacteria;JGI 0000069-P22;uncultured bacterium	4.02086	5.5233	3.67e-05	0.00169348
Eukaryota;SAR;Rhizaria;Cercozoa;Imbricatea;Silicofilosea	4.04177	5.94356	4.51e-06	0.00028304
Bacteria;Proteobacteria;Gammaproteobacteria;Enterobacteriales;Enterobacteriaceae;Serratia	4.04687	6.29238	5.96e-05	0.00247484
Bacteria;Proteobacteria;Gammaproteobacteria;Oceanospirillales;Nitrincolaceae;Amphritea	4.07129	7.10505	2.18e-05	0.00109135
Bacteria;Proteobacteria;Gammaproteobacteria;Vibrionales;Vibrionaceae;Photobacterium	4.08699	7.55959	1.41e-07	1.58e-05
Archaea;Nanoarchaeaeota;Woesearchaeia;Euryarchaeota archaeon SCGC AAA286-E23	4.08702	5.52859	1.33e-05	0.00073066
Bacteria;Verrucomicrobia;Verrucomicrobiae;Opitutales;Puniceicoccaceae;Lentimonas	4.09278	10.8856	5.57e-11	1.4e-08
Bacteria;Bacteroidetes;Bacteroidia;Flavobacteriales;NS9 marine group;hydrothermal vent metagenome	4.10265	6.68119	4.29e-06	0.00027431
Eukaryota;SAR;Rhizaria;Cercozoa;Thecofilosea;Cryomonadida	4.11314	6.00878	2.24e-05	0.00111665
Bacteria;Proteobacteria;Gammaproteobacteria;Alteromonadales;Shewanellaceae;Ferrimonas	4.16315	6.05191	1.47e-06	0.00010951
Bacteria;Bacteroidetes;Bacteroidia;Flavobacteriales;Flavobacteriaceae;Polaribacter 4	4.21629	6.50593	3.5e-07	3.54e-05
Bacteria;Proteobacteria;Alphaproteobacteria;Caulobacterales;Caulobacteraceae;Brevundimonas	4.26795	9.24694	4.15e-06	0.00027127
Bacteria;Proteobacteria;Gammaproteobacteria;Alteromonadales;Moritellaceae;Moritella	4.3152	9.97731	1.87e-11	5.34e-09
Bacteria;Bacteroidetes;Bacteroidia;Flavobacteriales;Flavobacteriaceae;Flavobacterium	4.32694	6.89758	4.52e-05	0.00199667
Bacteria;Bacteroidetes;Bacteroidia;Flavobacteriales;Flavobacteriaceae;Ulvibacter	4.34933	6.27964	2.89e-06	0.0002011
Bacteria;Proteobacteria;Gammaproteobacteria;Oceanospirillales;Nitrincolaceae;Neptunomonas	4.44644	5.86279	9.77e-07	8.16e-05
Bacteria;Proteobacteria;Alphaproteobacteria;Rhodobacterales;Rhodobacteraceae;Sedimentitalea	4.4683	5.84807	9.58e-06	0.00055616
Bacteria;Proteobacteria;Gammaproteobacteria;Alteromonadales;Shewanellaceae;Psychrobium	4.49283	9.59586	2.86e-12	9.44e-10
Bacteria;Proteobacteria;Alphaproteobacteria;Rhodobacterales;Rhodobacteraceae;Paracoccus	4.52226	7.04051	3.39e-05	0.00158721
Bacteria;Proteobacteria;Gammaproteobacteria;Cellvibrionales;Cellvibrionaceae;Gilvimarinus	4.54245	6.81625	1.82e-06	0.00013088
Bacteria;Proteobacteria;Alphaproteobacteria;Rhodobacterales;Rhodobacteraceae;HIMB11	4.5598	7.02529	0.00032066	0.00995162
Bacteria;Proteobacteria;Alphaproteobacteria;Caulobacterales;Hyphomonadaceae;Hirschia	4.58089	5.20037	0.00017859	0.00618551
Bacteria;Proteobacteria;Gammaproteobacteria;Cellvibrionales;Cellvibrionaceae;Cellvibrio	4.59409	7.11584	5.24e-05	0.00225113
Bacteria;Proteobacteria;Gammaproteobacteria;Oceanospirillales;Halomonadaceae;Halomonas	4.66061	8.25646	4.64e-07	4.47e-05
Bacteria;Proteobacteria;Gammaproteobacteria;Cellvibrionales;Halieaceae;uncultured bacterium	4.8093	5.39147	0.00015378	0.00544672
Bacteria;Proteobacteria;Gammaproteobacteria;Alteromonadales;Psychromonadaceae;Psychromonas	4.87765	8.02282	7.34e-11	1.7e-08
Bacteria;Proteobacteria;Gammaproteobacteria;Alteromonadales;Colwelliaceae;Thalassotalea	4.92357	8.48507	4.04e-11	1.07e-08
Bacteria;Proteobacteria;Alphaproteobacteria;Rhodobacterales;Rhodobacteraceae;Citreicella	4.95808	8.79279	0.00010558	0.00406079
Eukaryota;SAR;Rhizaria;Cercozoa;Thecofilosea;uncultured	4.99797	7.94453	5.64e-10	1.07e-07
Bacteria;Actinobacteria;Actinobacteria;Micrococcales;Microbacteriaceae;Microbacterium	5.00588	8.64744	0.00027058	0.00878896
Eukaryota;SAR;Stramenopiles;Labyrinthulomycetes;uncultured;uncultured eukaryote	5.01893	10.4044	1.94e-13	9.35e-11
Bacteria;Proteobacteria;Gammaproteobacteria;Alteromonadales;Alteromonadaceae;Paraglaciecola	5.01899	8.03563	7.45e-09	1.09e-06
Bacteria;Proteobacteria;Alphaproteobacteria;Rhodobacterales;Rhodobacteraceae;Pseudooceanicola	5.04991	8.13349	4.38e-05	0.00196351
Bacteria;Proteobacteria;Gammaproteobacteria;Oceanospirillales;Saccharospirillaceae;Oceanobacter	5.13014	5.66535	0.00017511	0.00609859
Eukaryota;SAR;Stramenopiles;Labyrinthulomycetes;Thraustochytriaceae;Thraustochytrium	5.1391	8.11682	1.2e-10	2.5e-08
Bacteria;Proteobacteria;Gammaproteobacteria;Alteromonadales;Colwelliaceae;Colwellia	5.18904	12.6894	2.01e-15	1.57e-12
Bacteria;Proteobacteria;Alphaproteobacteria;Sphingomonadales;Sphingomonadaceae;uncultured	5.19715	8.49687	6.56e-07	5.76e-05
Bacteria;Proteobacteria;Gammaproteobacteria;Alteromonadales;Marinobacteraceae;Marinobacter	5.2888	8.41589	1.8e-07	1.92e-05
Eukaryota;SAR;Stramenopiles;Ochrophyta;Chrysophyceae;Ochromonadales	5.30373	8.58963	1.29e-06	9.87e-05
Bacteria;Bacteroidetes;Bacteroidia;Flavobacteriales;Flavobacteriaceae;Polaribacter 3	5.31091	5.82942	1.77e-07	1.92e-05
Bacteria;Proteobacteria;Gammaproteobacteria;Oceanospirillales;Marinomonadaceae;Marinomonas	5.32815	8.80141	7.36e-09	1.09e-06
Bacteria;Proteobacteria;Gammaproteobacteria;Alteromonadales;Colwelliaceae;uncultured	5.43612	8.41295	2.59e-12	9.02e-10
Bacteria;Proteobacteria;Gammaproteobacteria;Alteromonadales;Idiomarinaceae;Idiomarina	5.4368	7.96403	8.1e-07	6.96e-05
Bacteria;Proteobacteria;Gammaproteobacteria;Oceanospirillales;Oleiphilaceae;Oleiphilus	5.53345	9.11172	2.03e-12	7.5e-10
Eukaryota;SAR;Stramenopiles;Labyrinthulomycetes;Thraustochytriaceae;Oblongichytrium sp. AMA-12	5.54038	6.85007	1.3e-09	2.33e-07
Bacteria;Proteobacteria;Alphaproteobacteria;Rhodobacterales;Rhodobacteraceae;Roseovarius	5.55161	8.28311	1.13e-06	8.86e-05
Bacteria;Proteobacteria;Alphaproteobacteria;Rhodobacterales;Rhodobacteraceae;Marinovum	5.68108	6.1402	3.5e-05	0.00162401
Bacteria;Proteobacteria;Alphaproteobacteria;Rhizobiales;Devosiaceae;Pelagibacterium	5.74046	6.26688	0.00014147	0.00509682
Eukaryota;SAR;Stramenopiles;Labyrinthulomycetes;uncultured;Oblongichytrium sp. BAFCcult 3519	5.77116	6.24196	2.09e-08	2.78e-06
Bacteria;Proteobacteria;Alphaproteobacteria;Caulobacterales;Caulobacteraceae;Caulobacter	5.82393	7.61953	0.00012908	0.00476009
Bacteria;Proteobacteria;Alphaproteobacteria;Rhodobacterales;Rhodobacteraceae;Pseudoruegeria	5.84995	7.14953	6.75e-06	0.00041457
Eukaryota;SAR;Stramenopiles;Ochrophyta;Dictyochophyceae;Pedinellales	5.8656	7.6246	9.78e-05	0.00378944
Bacteria;Proteobacteria;Alphaproteobacteria;Rhodobacterales;Rhodobacteraceae;Rubellimicrobium	5.88599	7.10838	0.0002444	0.00810663
Bacteria;Actinobacteria;Actinobacteria;Micrococcales;Microbacteriaceae;Leifsonia	5.93765	6.44951	9.79e-05	0.00378944
Bacteria;Proteobacteria;Alphaproteobacteria;Rhodobacterales;Rhodobacteraceae;Pelagibaca	5.94738	7.1793	1.42e-05	0.00077428
Bacteria;Proteobacteria;Gammaproteobacteria;Cellvibrionales;Spongiibacteraceae;Zhongshania	5.9586	11.4213	4.54e-07	4.45e-05
Bacteria;Proteobacteria;Gammaproteobacteria;Vibrionales;Vibrionaceae;Enterovibrio	6.0016	4.33774	0.00027222	0.00879676
Bacteria;Bacteroidetes;Bacteroidia;Flavobacteriales;Flavobacteriaceae;Polaribacter	6.0155	8.16818	4.07e-12	1.27e-09
Bacteria;Proteobacteria;Gammaproteobacteria;Oceanospirillales;Saccharospirillaceae;Oleispira	6.05062	8.19076	4.53e-10	9.17e-08
Bacteria;Cyanobacteria;Sericytochromatia;uncultured bacterium	6.19606	6.62885	1.97e-05	0.00101867
Eukaryota;SAR;Rhizaria;Cercozoa;Granofilosea;Massisteria	6.26056	7.48004	0.00024937	0.00818494
Bacteria;Proteobacteria;Gammaproteobacteria;Alteromonadales;Alteromonadaceae;Lacimicrobium	6.29967	4.56046	0.00025403	0.00829423
Bacteria;Proteobacteria;Alphaproteobacteria;Rhizobiales;Devosiaceae;Devosia	6.34175	9.95566	2.95e-05	0.0014124
Bacteria;Proteobacteria;Gammaproteobacteria;Oceanospirillales;Nitrincolaceae;Profundimonas	6.4833	10.0042	1.47e-16	1.53e-13
Bacteria;Proteobacteria;Alphaproteobacteria;Rickettsiales;Rickettsiaceae;Candidatus Megaira	6.56216	4.76351	8.58e-05	0.00338364
Bacteria;Bacteroidetes;Bacteroidia;Flavobacteriales;Cryomorphaceae;Luteibaculum	6.62123	7.83781	9.07e-06	0.00053624
Eukaryota;SAR;Stramenopiles;Labyrinthulomycetes;Thraustochytriaceae;Labyrinthuloides	6.69605	4.87025	1.32e-05	0.00073066
Bacteria;Firmicutes;Clostridia;Clostridiales;Christensenellaceae;uncultured	6.8127	4.96514	3.11e-06	0.00021393
Bacteria;Proteobacteria;Alphaproteobacteria;Caulobacterales;Caulobacteraceae;Phenylobacterium	6.84209	8.60844	7.37e-08	8.88e-06
Bacteria;Bacteroidetes;Bacteroidia;Flavobacteriales;NS9 marine group;seawater metagenome	6.86425	5.0064	3.45e-06	0.00023033
Bacteria;Proteobacteria;Gammaproteobacteria;Gammaproteobacteria Incertae Sedis;Unknown Family;Alkalimarinus	6.87527	8.09412	3.73e-13	1.56e-10
Bacteria;Proteobacteria;Alphaproteobacteria;Rhizobiales;Rhizobiaceae;Allorhizobium-Neorhizobium-Pararhizobium-Rhizobium	6.91754	9.10871	0.00010786	0.00412294
Eukaryota;SAR;Stramenopiles;Labyrinthulomycetes;Thraustochytriaceae;Schizochytrium	6.96344	8.18717	3.22e-13	1.44e-10
Eukaryota;SAR;Stramenopiles;Ochrophyta;Chrysophyceae;marine metagenome	7.0102	7.39635	4.74e-05	0.00207869
Bacteria;Bacteroidetes;Bacteroidia;Flavobacteriales;Flavobacteriaceae;Maribacter	7.01278	5.12932	1.47e-05	0.00077945
Bacteria;Proteobacteria;Alphaproteobacteria;Rhodobacterales;Rhodobacteraceae;Sulfitobacter	7.01714	7.39987	6.28e-11	1.51e-08
Bacteria;Proteobacteria;Alphaproteobacteria;Caulobacterales;Hyphomonadaceae;Maricaulis	7.07384	5.17955	1.48e-06	0.00010951
Eukaryota;SAR;Stramenopiles;Labyrinthulomycetes;uncultured;uncultured labyrinthulid	7.12732	10.2455	3.37e-18	5.28e-15
Bacteria;Proteobacteria;Gammaproteobacteria;Enterobacteriales;Enterobacteriaceae;Proteus	7.16994	5.26081	6.59e-07	5.76e-05
Eukaryota;SAR;Stramenopiles;Ochrophyta;Chrysophyceae;Chromulinales	7.20887	7.65668	1.54e-05	0.00081279
Bacteria;Proteobacteria;Gammaproteobacteria;Alteromonadales;Colwelliaceae;Thalassomonas	7.27627	7.65028	1.48e-12	5.8e-10
Bacteria;Proteobacteria;Alphaproteobacteria;Rhizobiales;Rhizobiaceae;Pseudaminobacter	7.27663	5.34919	0.0003073	0.00968083
Eukaryota;SAR;Stramenopiles;Labyrinthulomycetes;Thraustochytriaceae;uncultured	7.27861	5.35296	9.18e-07	7.77e-05
Bacteria;Proteobacteria;Alphaproteobacteria;Rhizobiales;Devosiaceae;Maritalea	7.28533	5.35912	6.61e-07	5.76e-05
Bacteria;Bacteroidetes;Bacteroidia;Flavobacteriales;Flavobacteriaceae;Polaribacter 1	7.34335	9.08693	8.88e-17	1.11e-13
Bacteria;Proteobacteria;Gammaproteobacteria;Oceanospirillales;Saccharospirillaceae;Bermanella	7.39001	5.44885	1.23e-07	1.46e-05
Bacteria;Bacteroidetes;Bacteroidia;Flavobacteriales;Flavobacteriaceae;Polaribacter 2	7.45457	5.50465	1.4e-07	1.58e-05
Bacteria;Proteobacteria;Alphaproteobacteria;Rhodobacterales;Rhodobacteraceae;Jannaschia	7.4737	5.51978	0.00021111	0.00715371
Bacteria;Actinobacteria;Actinobacteria;Micrococcales;Microbacteriaceae;Lysinimonas	7.67735	5.69893	0.00022217	0.00744811
Bacteria;Proteobacteria;Deltaproteobacteria;Myxococcales;MSB-4B10;uncultured bacterium	7.68248	5.70414	0.00018806	0.0064777
Bacteria;Proteobacteria;Alphaproteobacteria;Rhizobiales;Rhizobiaceae;Mesorhizobium	7.7662	9.89739	1.52e-06	0.0001109
Bacteria;Proteobacteria;Alphaproteobacteria;Caulobacterales;Hyphomonadaceae;Hyphomonas	7.78534	8.14729	2.53e-07	2.6e-05
Eukaryota;SAR;Stramenopiles;Bicosoecida;Pseudobodo;Pseudobodo tremulans	7.80677	8.13932	3.79e-05	0.00173429
Bacteria;Proteobacteria;Gammaproteobacteria;Alteromonadales;Alteromonadaceae;Agaribacter	7.81059	5.81592	0.00017323	0.00606708
Eukaryota;SAR;Stramenopiles;Labyrinthulomycetes;uncultured eukaryote	7.89518	5.89337	3.66e-09	6.38e-07
Bacteria;Proteobacteria;Gammaproteobacteria;Cellvibrionales;Spongiibacteraceae;Spongiibacter	7.97166	9.17582	1.93e-08	2.64e-06
Bacteria;Proteobacteria;Alphaproteobacteria;Rhodobacterales;Rhodobacteraceae;Ketogulonicigenium	7.97998	5.96892	4.8e-05	0.00208425
Eukaryota;Amoebozoa;Discosea;Longamoebia;Centramoebida;Balamuthia	8.07102	6.05149	4.01e-08	5.13e-06
Bacteria;Proteobacteria;Alphaproteobacteria;Rhizobiales;Rhizobiaceae;Hoeflea	8.31342	9.56078	0.0002942	0.00936215
Eukaryota;SAR;Stramenopiles;MAST-7;MAST-7D;uncultured stramenopile	8.35665	6.3122	8.38e-10	1.54e-07
Eukaryota;SAR;Stramenopiles;Labyrinthulomycetes;uncultured;Oblongichytrium sp. HK9	8.41692	8.77069	1.87e-15	1.57e-12
Bacteria;Proteobacteria;Gammaproteobacteria;Alteromonadales;Alteromonadaceae;Glaciecola	8.50728	6.45141	4.45e-09	7.43e-07
Eukaryota;Amoebozoa;Discosea;Flabellinia;Vannellida;Vannella	8.61947	8.94385	2.42e-07	2.53e-05
Bacteria;Proteobacteria;Alphaproteobacteria;Rhizobiales;Rhizobiaceae;Jiella	8.63155	6.56955	5.31e-05	0.00226532
Bacteria;Proteobacteria;Gammaproteobacteria;Betaproteobacteriales;Rhodocyclaceae;Methyloversatilis	8.64189	10.7794	0.00014763	0.00528858
Eukaryota;SAR;Stramenopiles;Bicosoecida;Pseudobodo;uncultured eukaryote	8.72722	9.96494	2.77e-06	0.00019522
Eukaryota;SAR;Stramenopiles;Labyrinthulomycetes;uncultured;Oblongichytrium sp. TN6	8.76257	6.68928	9.54e-11	2.14e-08
Bacteria;Tenericutes;Mollicutes;Mollicutes Incertae Sedis;Unknown Family;Candidatus Phytoplasma	8.96464	6.87713	7.85e-05	0.00317634
Eukaryota;SAR;Stramenopiles;Ochrophyta;Chrysophyceae;Synurales	9.01247	6.92688	1.09e-05	0.00062465
Bacteria;Actinobacteria;Actinobacteria;Micrococcales;Micrococcaceae;Kocuria	9.0146	6.93039	8.58e-05	0.00338364
Bacteria;Proteobacteria;Gammaproteobacteria;Betaproteobacteriales;Methylophilaceae;Methylotenera	9.26712	10.9572	4.82e-05	0.00208425
Bacteria;Proteobacteria;Alphaproteobacteria;Rhizobiales;Rhizobiaceae;Bartonella	9.51364	7.40192	7.8e-06	0.00046577
Bacteria;Bacteroidetes;Bacteroidia;Cytophagales;Cyclobacteriaceae;Roseivirga	9.75276	7.63222	9.97e-07	8.23e-05
Bacteria;Actinobacteria;Actinobacteria;Corynebacteriales;Dietziaceae;Dietzia	9.8616	7.73895	4.65e-09	7.47e-07
Eukaryota;Amoebozoa;Discosea;Flabellinia;Vannellida;Platyamoeba	9.96442	11.7315	1.27e-08	1.8e-06
Bacteria;Proteobacteria;Gammaproteobacteria;Betaproteobacteriales;Rhodocyclaceae;Denitromonas	10.3009	8.16454	0.00012013	0.00453689
Bacteria;Proteobacteria;Alphaproteobacteria;Rhodobacterales;Rhodobacteraceae;Loktanella	10.313	8.1772	2e-05	0.00102081
Bacteria;Proteobacteria;Alphaproteobacteria;Rhodobacterales;Rhodobacteraceae;Celeribacter	11.3563	9.20291	4.51e-06	0.00028304
Bacteria;Proteobacteria;Gammaproteobacteria;Nitrosococcales;Methylophagaceae;Methylophaga	13.1164	13.5122	4.08e-11	1.07e-08
Bacteria;Actinobacteria;Actinobacteria;Corynebacteriales;Nocardiaceae;Rhodococcus	13.3569	11.1915	6.25e-08	7.68e-06
Bacteria;Proteobacteria;Alphaproteobacteria;Rhizobiales;Rhizobiaceae;Aurantimonas	13.8621	11.6952	4.5e-09	7.43e-07
Bacteria;Proteobacteria;Gammaproteobacteria;Oceanospirillales;Saccharospirillaceae;Thalassolituus	13.9554	11.7883	2.79e-18	5.28e-15
